# Supplementary material for: Branched ubiquitin chain binding and deubiquitination by UCH37 facilitate proteasome clearance of stress-induced inclusions
Source: eLife. 2021 Nov 11;10:e72798. doi: 10.7554/eLife.72798 (PMC8635973; doi:10.7554/eLife.72798)
Supplement: Figure 6—source data 2. [file elife-72798-fig6-data2.xlsx]

## Sheet: WT
Time (s)	Cell5_7min_foci1	Cell5_10min_foci2	Cell5_12min_foci3	Cell6_15min_foci1	Cell6_17min_foci2	Cell6_19min_foci3	Cell7_25min_foci1	Cell7_27min_foci2	Cell7_29min_foci3	Cell8_32min_foci1	Cell8_35min_foci2	cell8_37min_foci3	cell9_40min_foci1	cell9_42min_foci2	cell9_44min_foci3	cell10_50min_foci1	cell10_52min_foci2	cell10_54min_foci3	cell11_57min_foci1	cell11_57min_foci2	cell11_59min_foci3
0	0	0	0	0	0	0	0	0	0	0	0	0	0	0	0	0	0	0	0	0	0
0.2014	0.053842	0.038361	0.052801	0.090175	0.084076	0.080442	0.043866	0.082676	0.037397	0.041289	0.04392	0.045571	0.059099	0.029309	0.045571	0.045571	0.055035	0.047755	0.024903	0.013694	0.050519
0.4016	0.066414	0.046194	0.088697	0.127317	0.120341	0.157298	0.09017	0.108211	0.068387	0.069784	0.076675	0.088149	0.098352	0.041757	0.088149	0.088149	0.090069	0.072944	0.056183	0.078008	0.049569
0.6015	0.098975	0.087218	0.093839	0.159994	0.133865	0.173439	0.134919	0.149896	0.092444	0.100748	0.103278	0.148883	0.130784	0.068164	0.148883	0.148883	0.13067	0.116219	0.086037	0.094218	0.076214
0.8017	0.13566	0.104947	0.110152	0.204295	0.172696	0.255659	0.154069	0.183295	0.106859	0.145076	0.13216	0.20167	0.147512	0.093528	0.20167	0.20167	0.114209	0.127792	0.124865	0.093947	0.130206
1.0015	0.126639	0.112511	0.115868	0.195841	0.185827	0.28138	0.184885	0.171624	0.13204	0.199057	0.165036	0.192084	0.16412	0.124275	0.192084	0.192084	0.181239	0.16045	0.158884	0.141794	0.165731
1.2017	0.141739	0.130456	0.11991	0.249153	0.209248	0.292648	0.180397	0.224325	0.127893	0.157753	0.149303	0.18627	0.189988	0.12536	0.18627	0.18627	0.206103	0.190799	0.155894	0.151758	0.152934
1.4016	0.168581	0.14711	0.148234	0.261426	0.199083	0.354005	0.210218	0.227703	0.161649	0.146295	0.152895	0.228103	0.186196	0.155259	0.228103	0.228103	0.203882	0.219546	0.168894	0.188404	0.196502
1.6018	0.181589	0.162881	0.153103	0.308515	0.227333	0.356744	0.228992	0.236496	0.18541	0.179636	0.165629	0.212708	0.202954	0.184333	0.212708	0.212708	0.235397	0.240126	0.180047	0.194216	0.198756
1.801	0.174698	0.145187	0.160587	0.304239	0.256473	0.363171	0.232295	0.236072	0.169673	0.235527	0.219559	0.179894	0.253617	0.178051	0.179894	0.179894	0.269888	0.259221	0.219141	0.210382	0.23536
2.0018	0.195379	0.166043	0.167969	0.34158	0.25996	0.327726	0.259534	0.271249	0.212449	0.198423	0.233756	0.204222	0.248762	0.200786	0.204222	0.204222	0.269415	0.237889	0.241716	0.22901	0.218216
2.2011	0.19325	0.172987	0.186287	0.361161	0.289517	0.396933	0.239034	0.260932	0.193317	0.204077	0.234309	0.198209	0.250211	0.206134	0.198209	0.198209	0.331279	0.316939	0.255461	0.2342	0.235279
2.4013	0.199215	0.184451	0.177703	0.36387	0.274335	0.435001	0.230905	0.275867	0.21383	0.221212	0.221621	0.250102	0.278424	0.21249	0.250102	0.250102	0.326674	0.252621	0.262526	0.247984	0.246918
2.6012	0.206139	0.178762	0.181326	0.408147	0.305476	0.436884	0.305906	0.282602	0.208495	0.289557	0.266028	0.249947	0.32049	0.222255	0.249947	0.249947	0.301803	0.265607	0.262884	0.24882	0.260584
2.8014	0.215045	0.197547	0.196776	0.414435	0.32543	0.472924	0.312528	0.317497	0.213312	0.324722	0.316258	0.292382	0.329417	0.256009	0.292382	0.292382	0.332966	0.314128	0.2747	0.269455	0.268889
3.0012	0.228563	0.196988	0.20641	0.422938	0.332388	0.486928	0.307398	0.331418	0.239354	0.289738	0.266092	0.291701	0.316705	0.245281	0.291701	0.291701	0.338831	0.26354	0.292132	0.272209	0.273038
3.2014	0.240098	0.218254	0.193117	0.426256	0.331816	0.480398	0.294641	0.318948	0.233138	0.295785	0.320034	0.254355	0.324054	0.230329	0.254355	0.254355	0.365636	0.349857	0.290422	0.275048	0.347859
3.4013	0.24568	0.211341	0.209341	0.419861	0.360363	0.547347	0.298707	0.338287	0.26699	0.285671	0.316611	0.319992	0.353976	0.276347	0.319992	0.319992	0.368107	0.369342	0.322224	0.301579	0.307681
3.6015	0.245859	0.239283	0.202372	0.436907	0.366709	0.525113	0.298724	0.351393	0.26589	0.369119	0.316128	0.329431	0.365484	0.291265	0.329431	0.329431	0.416835	0.344963	0.344111	0.309239	0.343113
3.8013	0.236484	0.226608	0.205118	0.455196	0.366358	0.496576	0.280896	0.36409	0.254018	0.321498	0.280996	0.353109	0.37842	0.283752	0.353109	0.353109	0.399492	0.365936	0.352678	0.308239	0.317302
4.0016	0.250281	0.243819	0.218355	0.437756	0.362709	0.541251	0.301611	0.368829	0.258642	0.334572	0.286423	0.359468	0.386774	0.316506	0.359468	0.359468	0.414475	0.361014	0.363263	0.30409	0.324641
4.2014	0.26696	0.221381	0.225987	0.451659	0.352176	0.504017	0.363195	0.373533	0.319521	0.343284	0.327631	0.364115	0.409326	0.293717	0.364115	0.364115	0.435153	0.344119	0.358568	0.328575	0.351557
4.4016	0.245876	0.228724	0.233248	0.450073	0.385969	0.543995	0.371996	0.40058	0.310286	0.352272	0.312552	0.366228	0.405753	0.353233	0.366228	0.366228	0.460099	0.359274	0.350287	0.343293	0.370612
4.6015	0.266784	0.244295	0.233129	0.444414	0.408815	0.557429	0.390303	0.40602	0.303452	0.305934	0.35351	0.361741	0.40454	0.310064	0.361741	0.361741	0.448212	0.382108	0.398646	0.321874	0.398094
4.8017	0.273217	0.260405	0.228664	0.484499	0.390633	0.499368	0.33591	0.422481	0.335812	0.371844	0.335381	0.386507	0.399954	0.322928	0.386507	0.386507	0.457683	0.396698	0.378609	0.364993	0.412875
5.0015	0.29887	0.234844	0.274275	0.485971	0.401928	0.518907	0.378343	0.428244	0.314556	0.343576	0.373862	0.376116	0.401343	0.320031	0.376116	0.376116	0.452749	0.391048	0.393455	0.349656	0.450973
5.2017	0.306207	0.251733	0.249754	0.47188	0.444223	0.554737	0.355264	0.40634	0.349166	0.386146	0.328192	0.422962	0.413642	0.341408	0.422962	0.422962	0.498322	0.427259	0.410621	0.369342	0.454506
5.4016	0.302291	0.255291	0.245397	0.511454	0.444321	0.530782	0.368009	0.382121	0.334919	0.363106	0.353462	0.422774	0.37955	0.323796	0.422774	0.422774	0.497481	0.402066	0.387968	0.3659	0.435306
5.6018	0.316319	0.276519	0.264363	0.490226	0.436092	0.495098	0.35162	0.427345	0.364202	0.372831	0.39958	0.381382	0.411913	0.353556	0.381382	0.381382	0.453746	0.434921	0.413203	0.358874	0.430302
5.8011	0.302514	0.270057	0.237806	0.529626	0.435015	0.540783	0.34828	0.420258	0.353532	0.388754	0.377982	0.416494	0.413693	0.356615	0.416494	0.416494	0.476911	0.400274	0.359939	0.382325	0.446353
6.0019	0.344638	0.298946	0.26494	0.492617	0.461305	0.564813	0.399717	0.409272	0.347835	0.424313	0.367482	0.340605	0.384535	0.384869	0.340605	0.340605	0.498521	0.447252	0.402941	0.383359	0.476726
6.2011	0.320896	0.294183	0.28168	0.495266	0.457709	0.571222	0.421174	0.383641	0.323392	0.416426	0.349384	0.378099	0.394717	0.385327	0.378099	0.378099	0.518417	0.434793	0.442921	0.412172	0.441374
6.4013	0.331137	0.287237	0.255991	0.526433	0.426621	0.509649	0.425068	0.458039	0.350744	0.36188	0.352449	0.362782	0.400267	0.396591	0.362782	0.362782	0.520276	0.433384	0.440709	0.410197	0.49773
6.6012	0.308035	0.283962	0.268897	0.505737	0.433784	0.515453	0.412824	0.409071	0.324835	0.360417	0.395453	0.40495	0.403769	0.380182	0.40495	0.40495	0.474624	0.418851	0.438034	0.404846	0.495474
6.8014	0.331252	0.280777	0.278978	0.525407	0.525078	0.578292	0.383791	0.467492	0.36072	0.39164	0.421792	0.372131	0.415543	0.370983	0.372131	0.372131	0.5061	0.461327	0.432522	0.424535	0.504006
7.0012	0.333957	0.297816	0.26922	0.537785	0.482773	0.519216	0.418022	0.486093	0.366387	0.427223	0.401192	0.422766	0.424584	0.392374	0.422766	0.422766	0.537102	0.490342	0.457358	0.428499	0.475011
7.2015	0.342391	0.309509	0.292297	0.55084	0.484009	0.550443	0.41118	0.461668	0.376982	0.403299	0.440419	0.464545	0.426143	0.35087	0.464545	0.464545	0.493263	0.442953	0.469152	0.437442	0.471982
7.4013	0.348021	0.289799	0.295915	0.576027	0.516343	0.572884	0.425982	0.45894	0.39039	0.381751	0.428652	0.424983	0.437388	0.380794	0.424983	0.424983	0.53505	0.47473	0.465118	0.449581	0.494063
7.6015	0.352811	0.302969	0.295552	0.59165	0.549428	0.558226	0.45309	0.46535	0.384659	0.392572	0.415645	0.402806	0.435155	0.392211	0.402806	0.402806	0.560974	0.432061	0.511106	0.442304	0.527764
7.8014	0.383808	0.307185	0.303787	0.582552	0.559922	0.596334	0.429564	0.451779	0.42726	0.38543	0.415437	0.472583	0.441304	0.390686	0.472583	0.472583	0.53109	0.465885	0.500729	0.460931	0.529336
8.0016	0.374157	0.311761	0.294195	0.561706	0.559936	0.579603	0.461873	0.464041	0.406799	0.386427	0.408906	0.462823	0.425963	0.435173	0.462823	0.462823	0.508228	0.45598	0.473307	0.462349	0.543651
8.2014	0.367316	0.33403	0.296713	0.558443	0.525223	0.56745	0.455206	0.46818	0.395848	0.390313	0.441074	0.381862	0.412029	0.435969	0.381862	0.381862	0.569424	0.480412	0.493268	0.510624	0.512615
8.4016	0.364136	0.326657	0.332274	0.581143	0.55615	0.608056	0.4584	0.461209	0.355746	0.420255	0.429741	0.377369	0.458947	0.408406	0.377369	0.377369	0.589125	0.539172	0.477903	0.473136	0.484803
8.6015	0.35774	0.314293	0.305491	0.60215	0.539043	0.602971	0.444591	0.49834	0.374096	0.432256	0.466765	0.442797	0.476947	0.410682	0.442797	0.442797	0.577028	0.457963	0.488619	0.47421	0.512475
8.8017	0.369469	0.318885	0.329275	0.535678	0.507436	0.569838	0.425681	0.463557	0.378729	0.428081	0.447896	0.497862	0.452036	0.422944	0.497862	0.497862	0.581088	0.482593	0.496149	0.474163	0.511134
9.0015	0.378291	0.320563	0.323119	0.564132	0.532086	0.594991	0.414935	0.477864	0.404426	0.437879	0.4445	0.476921	0.452984	0.392614	0.476921	0.476921	0.5667	0.506621	0.486345	0.458141	0.549081
9.2018	0.366058	0.356372	0.315086	0.58016	0.580561	0.562704	0.435742	0.463842	0.402941	0.446808	0.442244	0.516233	0.437384	0.404286	0.516233	0.516233	0.605365	0.500784	0.498053	0.500383	0.492139
9.401	0.366034	0.342522	0.339522	0.578596	0.527957	0.517364	0.445912	0.48197	0.393701	0.435574	0.499101	0.554785	0.468617	0.436417	0.554785	0.554785	0.570147	0.4913	0.507581	0.47061	0.524581
9.6018	0.385693	0.34345	0.329424	0.570838	0.530271	0.603836	0.506753	0.470488	0.388459	0.442382	0.42959	0.507667	0.490512	0.445867	0.507667	0.507667	0.616808	0.484482	0.514552	0.517817	0.517303
9.8011	0.378774	0.361095	0.318822	0.623168	0.550759	0.592461	0.463807	0.5021	0.402364	0.41799	0.45046	0.520321	0.469624	0.406795	0.520321	0.520321	0.590582	0.518938	0.524472	0.51683	0.509525
10.0019	0.387703	0.35386	0.339738	0.619666	0.550287	0.546995	0.476272	0.515598	0.401541	0.46092	0.462762	0.511778	0.495074	0.421324	0.511778	0.511778	0.568279	0.555128	0.533642	0.519534	0.55845
10.2011	0.382844	0.372663	0.343646	0.61627	0.606314	0.60542	0.485309	0.490232	0.437265	0.475151	0.475002	0.469999	0.476001	0.385326	0.469999	0.469999	0.590408	0.521966	0.516157	0.521805	0.594513
10.4013	0.417942	0.361583	0.332484	0.616213	0.577403	0.607866	0.477294	0.508017	0.383436	0.47169	0.456959	0.529509	0.490965	0.424485	0.529509	0.529509	0.566071	0.519152	0.534227	0.507222	0.540212
10.6012	0.404636	0.376666	0.342753	0.609403	0.550216	0.593986	0.46458	0.488405	0.417566	0.486537	0.489696	0.52107	0.505025	0.444047	0.52107	0.52107	0.638822	0.531803	0.541556	0.524297	0.543789
10.8014	0.390497	0.363635	0.348542	0.610139	0.558566	0.619731	0.455989	0.516661	0.455646	0.487723	0.479077	0.48257	0.507461	0.386	0.48257	0.48257	0.589201	0.561625	0.535183	0.547384	0.516697
11.0012	0.408441	0.376986	0.337326	0.627056	0.598557	0.597266	0.477135	0.481359	0.460866	0.452104	0.462491	0.528031	0.52835	0.404885	0.528031	0.528031	0.650863	0.508515	0.573135	0.560814	0.505173
11.2015	0.412393	0.360489	0.351008	0.617562	0.560901	0.571757	0.475013	0.519273	0.4288	0.416006	0.433646	0.487983	0.503105	0.400852	0.487983	0.487983	0.613145	0.528221	0.548032	0.542547	0.56393
11.4013	0.41262	0.356055	0.323696	0.599228	0.573952	0.620045	0.48403	0.484588	0.457616	0.412394	0.483158	0.505355	0.504695	0.434	0.505355	0.505355	0.631857	0.535333	0.55877	0.510561	0.566955
11.6015	0.418868	0.371712	0.349801	0.605449	0.640184	0.592173	0.488518	0.479773	0.461204	0.492292	0.473027	0.5341	0.521172	0.465549	0.5341	0.5341	0.635282	0.583758	0.526518	0.530558	0.595562
11.8014	0.41972	0.384894	0.35122	0.577396	0.580329	0.570365	0.496166	0.450701	0.442814	0.483846	0.486131	0.488194	0.529907	0.459681	0.488194	0.488194	0.641707	0.561147	0.561045	0.540754	0.611072
12.0016	0.432986	0.373174	0.321466	0.612145	0.606726	0.597639	0.530761	0.514501	0.432159	0.443236	0.473519	0.479947	0.514213	0.431332	0.479947	0.479947	0.650309	0.603983	0.586443	0.539694	0.604431
12.2014	0.419708	0.37344	0.329303	0.602204	0.621932	0.571508	0.521935	0.508615	0.437093	0.482288	0.470919	0.466042	0.553553	0.473799	0.466042	0.466042	0.633364	0.577891	0.565718	0.522651	0.607155
12.4016	0.389588	0.406822	0.346164	0.621633	0.572498	0.568422	0.510224	0.52646	0.441804	0.475273	0.493561	0.466437	0.556058	0.457472	0.466437	0.466437	0.678624	0.546752	0.597598	0.55773	0.594863
12.6015	0.423073	0.411052	0.342331	0.615504	0.602155	0.578098	0.477092	0.534838	0.475649	0.460042	0.492572	0.549322	0.536295	0.462682	0.549322	0.549322	0.643617	0.53	0.604135	0.570787	0.578791
12.8017	0.42494	0.394891	0.354204	0.63688	0.58165	0.629113	0.512205	0.529278	0.496	0.447833	0.464809	0.557048	0.536847	0.483718	0.557048	0.557048	0.667021	0.598007	0.554349	0.563934	0.587984
13.0015	0.419124	0.414059	0.385973	0.636493	0.632724	0.634106	0.510806	0.477884	0.450434	0.452012	0.470398	0.538246	0.539558	0.48257	0.538246	0.538246	0.674327	0.565662	0.620705	0.584097	0.582773
13.2013	0.430598	0.38509	0.330921	0.636389	0.611894	0.648128	0.48585	0.484795	0.496271	0.473683	0.519332	0.549821	0.57874	0.484444	0.549821	0.549821	0.672333	0.590687	0.579053	0.518558	0.621639
13.4015	0.410375	0.402826	0.358848	0.609322	0.592055	0.697076	0.514802	0.518322	0.464456	0.464521	0.549241	0.509172	0.543528	0.467516	0.509172	0.509172	0.640573	0.592108	0.558302	0.554974	0.633255
13.6014	0.444923	0.397326	0.331072	0.617656	0.625124	0.709378	0.519151	0.504449	0.480479	0.469971	0.530001	0.431391	0.57226	0.482695	0.431391	0.431391	0.649912	0.649512	0.567175	0.551476	0.598938
13.8012	0.420623	0.39816	0.36864	0.638898	0.611627	0.641851	0.51991	0.529679	0.44411	0.469332	0.53044	0.447951	0.582864	0.456297	0.447951	0.447951	0.611854	0.595356	0.580391	0.554535	0.595543
14.0014	0.429982	0.432958	0.353731	0.627661	0.635011	0.675054	0.538993	0.5237	0.432497	0.442868	0.525682	0.489123	0.598952	0.449925	0.489123	0.489123	0.609501	0.591141	0.588334	0.562184	0.630411
14.2013	0.429543	0.444345	0.358326	0.676838	0.58798	0.668454	0.500697	0.533311	0.446755	0.442561	0.491308	0.52504	0.59939	0.4719	0.52504	0.52504	0.635208	0.604881	0.57976	0.602728	0.641982
14.4015	0.453009	0.420641	0.356402	0.664092	0.640032	0.686219	0.516756	0.594587	0.451332	0.3822	0.533465	0.483011	0.581283	0.476612	0.483011	0.483011	0.630995	0.624259	0.56804	0.604168	0.582078
14.6013	0.430632	0.408753	0.349154	0.67366	0.583595	0.662248	0.471553	0.577367	0.478458	0.425445	0.50231	0.539596	0.572727	0.480375	0.539596	0.539596	0.686099	0.61872	0.582878	0.569585	0.617302
14.8015	0.431425	0.412937	0.337612	0.644584	0.611558	0.645461	0.519853	0.61414	0.473825	0.477235	0.500692	0.523422	0.587293	0.492788	0.523422	0.523422	0.635494	0.629431	0.573137	0.577184	0.571212
15.0011	0.433885	0.421969	0.349654	0.645709	0.620223	0.677523	0.532322	0.56809	0.485103	0.453862	0.50916	0.585507	0.572088	0.473122	0.585507	0.585507	0.636414	0.583715	0.60507	0.581585	0.619742
15.2016	0.451468	0.420388	0.348935	0.656833	0.618305	0.720577	0.536219	0.560947	0.485704	0.453541	0.492228	0.591127	0.590346	0.452212	0.591127	0.591127	0.628335	0.57223	0.590136	0.580187	0.63887
15.4012	0.449979	0.452638	0.352737	0.687146	0.57619	0.623915	0.533149	0.550976	0.478907	0.476816	0.540566	0.570181	0.559268	0.471713	0.570181	0.570181	0.651747	0.625762	0.603622	0.579255	0.610663
15.6016	0.460246	0.427283	0.35757	0.612208	0.599885	0.595005	0.499591	0.532127	0.464147	0.464694	0.555586	0.517059	0.606939	0.466249	0.517059	0.517059	0.616376	0.595588	0.595854	0.565212	0.617203
15.8012	0.47805	0.450111	0.331611	0.679223	0.606483	0.66074	0.486309	0.521503	0.44795	0.448646	0.497371	0.495631	0.573889	0.494003	0.495631	0.495631	0.633404	0.622843	0.587102	0.598572	0.575146
16.0017	0.456515	0.442179	0.349129	0.653389	0.630764	0.656274	0.492546	0.548828	0.4767	0.482212	0.500398	0.576538	0.546736	0.497906	0.576538	0.576538	0.627734	0.661378	0.580191	0.604989	0.624841
16.2013	0.455254	0.418062	0.385921	0.635159	0.645315	0.667512	0.522485	0.556123	0.445839	0.450016	0.468391	0.474992	0.612574	0.547856	0.474992	0.474992	0.602422	0.629619	0.649149	0.558162	0.64635
16.4017	0.47379	0.45531	0.364495	0.640265	0.640335	0.654354	0.482274	0.582913	0.46713	0.497666	0.532028	0.536386	0.648511	0.514849	0.536386	0.536386	0.584469	0.638248	0.629325	0.582393	0.625499
16.6014	0.449699	0.425248	0.383066	0.672661	0.665184	0.633642	0.514049	0.569532	0.511533	0.446737	0.526732	0.569082	0.606576	0.547311	0.569082	0.569082	0.631979	0.636619	0.630015	0.58091	0.634765
16.8018	0.44963	0.422747	0.365393	0.6899	0.633649	0.674437	0.523275	0.589371	0.517896	0.402849	0.536745	0.516266	0.650943	0.545021	0.516266	0.516266	0.648538	0.597654	0.586525	0.587563	0.677296
17.0014	0.439304	0.403717	0.36754	0.657553	0.616644	0.657286	0.501184	0.615167	0.484262	0.440543	0.561677	0.543363	0.646594	0.512797	0.543363	0.543363	0.611702	0.618992	0.560146	0.566496	0.675391
17.2019	0.463642	0.417046	0.345434	0.671646	0.640185	0.697265	0.505623	0.589002	0.486389	0.432121	0.553645	0.557066	0.62183	0.557912	0.557066	0.557066	0.652766	0.609303	0.592997	0.674073	0.589381
17.4015	0.437385	0.433393	0.380368	0.609745	0.62084	0.647467	0.479739	0.565996	0.484903	0.427115	0.534198	0.595047	0.620839	0.516779	0.595047	0.595047	0.582918	0.652029	0.560897	0.613336	0.611629
17.6013	0.439092	0.43689	0.345017	0.675691	0.607692	0.700299	0.483637	0.589494	0.461044	0.409074	0.569822	0.519112	0.601089	0.555517	0.519112	0.519112	0.606282	0.634309	0.622903	0.606806	0.626916
17.8015	0.420375	0.447605	0.363412	0.709976	0.63985	0.632121	0.503306	0.580591	0.476411	0.479368	0.558	0.578587	0.604988	0.519749	0.578587	0.578587	0.654439	0.642273	0.610887	0.618027	0.686381
18.0014	0.412215	0.460317	0.352013	0.684614	0.618041	0.642977	0.525504	0.618743	0.472957	0.472956	0.526652	0.560686	0.607848	0.559637	0.560686	0.560686	0.630443	0.646949	0.600449	0.618135	0.662279
18.2016	0.412266	0.434089	0.361536	0.650619	0.639291	0.72025	0.49182	0.639183	0.489253	0.501775	0.50247	0.636851	0.63066	0.546697	0.636851	0.636851	0.602843	0.654965	0.625746	0.628446	0.67564
18.4014	0.456233	0.453014	0.37281	0.678389	0.658209	0.68754	0.510832	0.592718	0.481007	0.483735	0.536372	0.575461	0.657228	0.544438	0.575461	0.575461	0.590472	0.671015	0.600924	0.603738	0.656579
18.601	0.421482	0.47663	0.369224	0.710411	0.644009	0.660647	0.504781	0.564328	0.484859	0.480846	0.597901	0.618398	0.628726	0.52423	0.618398	0.618398	0.634187	0.682944	0.623769	0.62995	0.705102
18.8015	0.466847	0.437956	0.369768	0.687371	0.649089	0.694224	0.505376	0.60508	0.482438	0.443459	0.576872	0.575679	0.619471	0.575156	0.575679	0.575679	0.615995	0.668838	0.633404	0.603162	0.632417
19.0011	0.455511	0.464451	0.368418	0.681386	0.643449	0.674559	0.500353	0.566703	0.449131	0.447527	0.54315	0.578639	0.620883	0.576633	0.578639	0.578639	0.62705	0.665357	0.68941	0.622133	0.609682
19.2015	0.475955	0.450257	0.391715	0.699253	0.69454	0.660767	0.495118	0.605932	0.47304	0.427578	0.584653	0.548439	0.60498	0.570283	0.548439	0.548439	0.633606	0.635051	0.643689	0.611431	0.669926
19.4012	0.475601	0.456934	0.36292	0.729447	0.66259	0.6895	0.477527	0.558632	0.459249	0.478305	0.589916	0.603027	0.601844	0.520702	0.603027	0.603027	0.653471	0.660096	0.689958	0.624324	0.673684
19.6016	0.420555	0.444363	0.364976	0.686247	0.662925	0.643908	0.511017	0.592782	0.470829	0.426428	0.533507	0.602718	0.601713	0.565786	0.602718	0.602718	0.665502	0.64191	0.653779	0.62249	0.6606
19.8012	0.473384	0.469161	0.360923	0.686017	0.675315	0.672039	0.517423	0.575793	0.454305	0.436846	0.57029	0.565892	0.59818	0.500934	0.565892	0.565892	0.630969	0.640703	0.700606	0.688421	0.691219
20.0017	0.445309	0.457493	0.346441	0.657001	0.669278	0.708169	0.504239	0.575006	0.442352	0.445364	0.531869	0.619582	0.600856	0.574108	0.619582	0.619582	0.64978	0.664967	0.681273	0.643657	0.689661
20.2013	0.466577	0.467063	0.371815	0.693013	0.630551	0.675541	0.502469	0.631189	0.476819	0.485946	0.551622	0.687042	0.625344	0.551239	0.687042	0.687042	0.666161	0.662493	0.694636	0.606858	0.731217
20.4017	0.445639	0.460346	0.367399	0.696205	0.651388	0.650517	0.513526	0.57989	0.49326	0.472108	0.599933	0.571535	0.645527	0.554703	0.571535	0.571535	0.661159	0.660158	0.676477	0.628722	0.692147
20.6013	0.442309	0.481454	0.375425	0.716184	0.684028	0.619706	0.551036	0.616598	0.520594	0.477325	0.55237	0.57938	0.657476	0.561595	0.57938	0.57938	0.657572	0.666304	0.666407	0.607685	0.704061
20.8018	0.439152	0.457505	0.393893	0.696854	0.684247	0.657231	0.549738	0.590079	0.510948	0.499615	0.553243	0.620165	0.645077	0.549142	0.620165	0.620165	0.613256	0.676955	0.689409	0.661708	0.728507
21.0014	0.458084	0.447486	0.379734	0.723918	0.668275	0.688017	0.518148	0.625969	0.523764	0.510097	0.564333	0.614233	0.606254	0.535033	0.614233	0.614233	0.595072	0.671421	0.672665	0.655493	0.658071
21.2018	0.440312	0.459214	0.386863	0.734416	0.707067	0.691926	0.56186	0.581518	0.529677	0.467698	0.568803	0.608448	0.646216	0.518095	0.608448	0.608448	0.634913	0.675622	0.688088	0.62571	0.66784
21.4015	0.439521	0.462827	0.404299	0.737886	0.752913	0.718376	0.543109	0.617259	0.480564	0.494699	0.535525	0.614817	0.637362	0.539913	0.614817	0.614817	0.641855	0.666967	0.675444	0.665488	0.687936
21.6013		0.467345	0.398173	0.711822	0.696568	0.722681	0.533764	0.607527	0.509282	0.483209	0.573355	0.644017	0.66886	0.526495	0.644017	0.644017	0.64659	0.648764	0.7015	0.641524	0.687001
21.8015		0.503951	0.438209	0.698467	0.665577	0.760312	0.538238	0.617027	0.505433	0.502269	0.587959	0.661386	0.656097	0.554155	0.661386	0.661386	0.621251	0.663347	0.708434	0.645395	0.680221
22.0014		0.494917	0.400332	0.754699	0.713952	0.744232	0.546287	0.653514	0.513745	0.502127	0.548223	0.64211	0.674242	0.545987	0.64211	0.64211	0.714126	0.652508	0.675619	0.607661	0.636386
22.2016		0.456704	0.404879	0.757933	0.665708	0.678876	0.521541	0.660685	0.514672	0.479409	0.594946	0.616883	0.651033	0.550034	0.616883	0.616883	0.621576	0.644272	0.703959	0.650242	0.654056
22.4014		0.456738	0.398478	0.781571	0.669929	0.693985		0.699577	0.537264	0.481303	0.571549	0.630942	0.644282	0.53576	0.630942	0.630942	0.642485	0.628953	0.672417	0.67769	0.695125
22.6011		0.486646	0.413052	0.773859	0.680129	0.755399		0.682136	0.541069	0.509202	0.594024	0.68568	0.675565	0.566384	0.68568	0.68568	0.619861	0.671115	0.709149	0.652036	0.664642
22.8015		0.491502	0.406279	0.731993	0.670902	0.748977		0.674441	0.536464	0.525932	0.601131	0.631596	0.660518	0.531226	0.631596	0.631596	0.663159	0.649178	0.702113	0.63614	0.662212
23.0011		0.48176	0.431094	0.733114	0.776569	0.743871		0.69329	0.593308	0.526661	0.588702	0.607326	0.656027	0.554635	0.607326	0.607326	0.709242	0.66414	0.697505	0.637811	0.680828
23.2015		0.47184	0.421534	0.725663	0.717451	0.738493		0.66588	0.554784	0.493212	0.580087	0.620758	0.690076	0.52614	0.620758	0.620758	0.661624	0.675205	0.642847	0.650435	0.721754
23.4012		0.510928	0.432813	0.74862	0.713227	0.753421		0.666306	0.550707	0.481669	0.529564	0.649323	0.679843	0.543376	0.649323	0.649323	0.657867	0.676346	0.669343	0.652439	0.681825
23.6016		0.478764	0.40686	0.743271	0.720216	0.751508		0.632717	0.574809	0.506419	0.589909	0.634054	0.64157	0.495527	0.634054	0.634054	0.645334	0.671826	0.667383	0.67309	0.744027
23.8012		0.474091	0.424415	0.703139	0.690199	0.781068		0.681982	0.536993	0.497154	0.596292	0.637921	0.690697	0.513817	0.637921	0.637921	0.656839	0.641849	0.682172	0.695291	0.739933
24.0017		0.478882	0.412193	0.714946	0.764281	0.800781		0.672997	0.549387	0.556925	0.611217	0.644406	0.669208	0.511006	0.644406	0.644406	0.679631	0.64955	0.707151	0.638813	0.701471
24.2013		0.480619	0.403352	0.714895	0.738084	0.746651		0.695031	0.543107	0.5332	0.623222	0.602451	0.683457	0.545243	0.602451	0.602451	0.677648	0.638423	0.717719	0.642022	0.792251
24.4017		0.510801	0.420006	0.731946	0.761334	0.751105		0.644588	0.586546	0.593506	0.559279	0.617084	0.661279	0.529261	0.617084	0.617084	0.701714	0.670766	0.717619	0.669226	0.689717
24.6014		0.475749	0.41095	0.717372	0.766387	0.783453		0.67618	0.570465	0.510459	0.609182	0.621674	0.650121	0.556005	0.621674	0.621674	0.709921	0.67548	0.685729	0.625175	0.744575
24.8018		0.472204	0.404535	0.728849	0.71332	0.86847		0.685917	0.552016	0.475277	0.584762	0.612921	0.642953	0.520384	0.612921	0.612921	0.67045	0.696996	0.695811	0.673928	0.730256
25.0014		0.485148	0.406193	0.759224	0.698606	0.761743		0.702949	0.572073	0.558334	0.577112	0.584791	0.671954	0.534805	0.584791	0.584791	0.665742	0.689574	0.705173	0.669147	0.75437
25.2018		0.483891	0.40845	0.732551	0.692013	0.756426		0.694554	0.550622	0.520249	0.602702	0.586126	0.709835	0.536302	0.586126	0.586126	0.653181	0.61366	0.750578	0.687596	0.733529
25.4015		0.487516	0.41827	0.775838	0.692812	0.877297		0.667514	0.614857	0.561871	0.597092	0.617208	0.708021	0.5559	0.617208	0.617208	0.662029	0.617199	0.70517	0.633778	0.735541
25.6013		0.489289	0.402319	0.76298	0.718783	0.800298		0.670703	0.587083	0.52618	0.597868	0.648279	0.655033	0.535333	0.648279	0.648279	0.62388		0.725061	0.685852	0.73519
25.8015		0.485738	0.409007	0.747348	0.751011	0.861997		0.703054	0.595906	0.558921	0.620625	0.648555	0.685456	0.536636	0.648555	0.648555	0.659963		0.748275	0.709438	0.708664
26.0014		0.506932	0.39613	0.771059	0.696847	0.81565		0.66974	0.550543	0.548872	0.575645	0.653634	0.64648	0.564442	0.653634	0.653634	0.653162		0.735216	0.691868	0.782727
26.201		0.467638	0.399697	0.748527	0.717005	0.86389		0.689097	0.578788	0.525575	0.620925	0.701575	0.651968	0.53646	0.701575	0.701575	0.677402		0.764173	0.716597	0.746656
26.4014		0.484756		0.716276	0.698365	0.855415		0.68984	0.579288	0.525862	0.592005	0.67287	0.646655	0.549234	0.67287	0.67287	0.703008		0.72013	0.700852	0.717435
26.6011		0.485237		0.710737	0.703	0.777962		0.705246	0.531884	0.531577	0.627497	0.664211	0.644649	0.533913	0.664211	0.664211	0.656466		0.709427	0.730608	0.758449
26.8015		0.485856		0.739641	0.705335	0.755886		0.666076	0.554214	0.579002	0.623104	0.586221	0.636375	0.572354	0.586221	0.586221	0.688071		0.752314	0.723186	0.783121
27.0011		0.49247		0.700109	0.6722	0.773444		0.678179	0.540508	0.526946	0.570735	0.685985	0.62015	0.595186	0.685985	0.685985	0.70446		0.758184	0.707944	0.777372
27.2016		0.485775		0.73022	0.706315	0.770032		0.640172	0.560709	0.523324	0.680068	0.659444	0.667769	0.564681	0.659444	0.659444	0.722628		0.720096	0.680443	0.735709
27.4012		0.509688		0.813152	0.684973	0.875947			0.54838	0.529862	0.627732	0.638499	0.623499	0.598735	0.638499	0.638499	0.643674		0.727693	0.705831	0.748911
27.6016		0.506423		0.766913	0.666664	0.826163			0.582837		0.567647	0.633487	0.618119	0.585416	0.633487	0.633487	0.67872		0.744407	0.688802	0.701147
27.8012		0.46454		0.768961	0.655816	0.820562			0.566465		0.650113	0.67059	0.661851	0.582495	0.67059	0.67059	0.673854		0.729486	0.700214	0.713857
28.0017		0.506768		0.786643	0.722859	0.764108			0.629329		0.572315	0.689425	0.610288	0.599595	0.689425	0.689425	0.689338		0.702815	0.731621	0.708764
28.2013		0.506726		0.788406	0.712806	0.790351			0.603061		0.651262	0.646739	0.674421	0.625644	0.646739	0.646739	0.682665		0.705275	0.685847	0.690708
28.4017		0.493303		0.773037	0.7051	0.746786			0.59961		0.568869	0.66613	0.638646	0.593499	0.66613	0.66613	0.649403		0.741059	0.655092	0.691676
28.6014		0.472832		0.756268	0.697925	0.819722			0.569864		0.644553	0.628443	0.663203	0.594008	0.628443	0.628443	0.677884		0.744277	0.685791	0.753243
28.8018		0.509068		0.786656	0.72249	0.886187			0.58948		0.584395	0.617241	0.667804	0.575989	0.617241	0.617241	0.625533		0.756837	0.630818	0.712095
29.0014		0.53523		0.745956	0.686596	0.843218			0.553811		0.577816	0.64109	0.718684	0.616146	0.64109	0.64109	0.674098		0.746951	0.670511	0.724912
29.2019		0.516326		0.737578	0.730851	0.863218			0.574274		0.636915	0.643613	0.684927	0.618241	0.643613	0.643613	0.695494		0.756107	0.686866	0.719547
29.4015		0.506721			0.765418	0.851078			0.53254		0.590792	0.637497	0.669677	0.630995	0.637497	0.637497	0.681774		0.752802	0.682494	0.64265
29.6013		0.500322			0.737231	0.823367			0.536529		0.623171	0.65694	0.677908	0.593266	0.65694	0.65694	0.705738		0.761998	0.690604	0.635458
29.8015		0.490586			0.757393	0.897119			0.560693		0.605182	0.637503	0.719952	0.649384	0.637503	0.637503	0.667929		0.728247	0.669348	0.660227
30.0014		0.495352			0.75993	0.914105			0.568197		0.619325	0.712401	0.760341	0.593847	0.712401	0.712401	0.669285		0.766726	0.68873	0.681098
30.201		0.514004			0.741984	0.886885			0.546838		0.595351	0.728501	0.713674	0.623927	0.728501	0.728501	0.629623		0.738812	0.679103	0.763679
30.4015		0.511676			0.728531	0.898505			0.509155		0.616115	0.681493	0.722476	0.591016	0.681493	0.681493	0.694477		0.751023	0.670859	0.68
30.6011		0.508295			0.766183	0.903405			0.542623		0.605717	0.672048	0.704534	0.614042	0.672048	0.672048	0.705379		0.765448	0.66556	0.720879
30.8015		0.507863			0.726858	0.885154			0.58672		0.632844	0.678531	0.664984	0.611622	0.678531	0.678531	0.702037		0.779229	0.679283	0.721303
31.0011		0.50742			0.773551	0.861468			0.565755		0.600871	0.657689	0.699841	0.637271	0.657689	0.657689	0.725402		0.743444	0.67721	0.716716
31.2015		0.477008			0.762975	0.851259			0.559998		0.581369	0.718201	0.746153	0.622985	0.718201	0.718201	0.755996		0.773899	0.714811	0.738502
31.4012		0.521178			0.788152	0.899095			0.576931		0.576224	0.683952	0.69933	0.623348	0.683952	0.683952	0.737342		0.742103	0.694234	0.759097
31.6016		0.501994			0.772231	0.897911			0.525914		0.618813	0.579599	0.71496	0.610751	0.579599	0.579599	0.72206		0.734286	0.706408	0.773386
31.8012		0.507778			0.791697	0.916579			0.569256		0.606868	0.627495	0.707242	0.628399	0.627495	0.627495	0.743984		0.746017	0.664998	0.68921
32.0017		0.493072			0.75595	0.895211			0.601297		0.589767	0.644667	0.722068	0.641795	0.644667	0.644667	0.694151		0.707781	0.667169	0.691887
32.2013		0.506597			0.824061	0.86806			0.602372		0.629928	0.691478	0.784437	0.590773	0.691478	0.691478	0.724752		0.737712	0.652992	0.710259
32.4017		0.518014			0.732593	0.832183			0.598988		0.580165	0.643826	0.707067	0.658345	0.643826	0.643826	0.725968		0.760345	0.672575	0.692727
32.6013		0.522383			0.781578	0.936643			0.593486		0.606135	0.666755	0.679101	0.64751	0.666755	0.666755	0.656499		0.74536	0.679545	0.7739
32.8018		0.523008			0.75196	0.903732			0.616472		0.58349	0.598547	0.703199	0.652447	0.598547	0.598547	0.653524		0.757131	0.660103	0.7619
33.0014		0.527784			0.786256	0.846066			0.602138		0.572409	0.643914	0.718627	0.644577	0.643914	0.643914	0.68566		0.801891	0.66808	0.70673
33.2018		0.509464			0.800287	0.91564			0.610479		0.619288	0.67744	0.73438	0.665149	0.67744	0.67744	0.681374		0.769066	0.667922	0.731705
33.4015		0.538991			0.75232	0.930885			0.591039		0.618136	0.670034	0.68107	0.669114	0.670034	0.670034	0.722675		0.780977	0.6789	0.657677
33.6013		0.532302			0.766531	0.897397			0.609876		0.632825	0.690982	0.711391	0.615061	0.690982	0.690982	0.705765		0.769905	0.624602	0.751591
33.8015		0.549258			0.792294	0.979536			0.598459		0.589679	0.677757	0.697159	0.631104	0.677757	0.677757	0.709051		0.752326	0.679604	0.741107
34.0014		0.568917			0.795169	0.969075			0.602155		0.609319	0.684347	0.719047	0.629748	0.684347	0.684347	0.749957		0.781844	0.663494	0.734472
34.2016		0.538373			0.790779	1.03729			0.579244		0.55897	0.735354	0.717025	0.650773	0.735354	0.735354	0.711352		0.781344	0.655894	0.741153
34.4014		0.513763			0.843605	0.950332			0.588927		0.552195	0.678216	0.711445	0.638091	0.678216	0.678216	0.683216		0.807702	0.634931	0.741484
34.6011		0.559442			0.790491	0.937662			0.57509		0.574092	0.642653	0.677796	0.682341	0.642653	0.642653	0.704957		0.770801	0.650625	0.707466
34.8015		0.545732			0.823269	0.936941			0.57761		0.591505	0.687003	0.726429	0.62838	0.687003	0.687003	0.679605		0.801636	0.664924	0.721909
35.0011		0.540348			0.80336	1.00096			0.573782		0.594333	0.704043	0.722449	0.633379	0.704043	0.704043	0.713496		0.776985	0.634794	0.746058
35.2015		0.551113			0.831571	0.927306			0.582998		0.607335	0.694446	0.731825	0.684517	0.694446	0.694446	0.686748		0.800105	0.636112	0.739039
35.4011		0.52423			0.798497	0.958933			0.606433		0.61289	0.69359	0.762257	0.689504	0.69359	0.69359	0.715306		0.799796	0.641205	0.750967
35.6016		0.554557			0.79288	0.960821			0.61899		0.642608	0.663321	0.745819	0.630376	0.663321	0.663321	0.723458		0.780576	0.670513	0.76307
35.8012		0.535597			0.830914	0.934671			0.608933		0.652331	0.669786	0.783256	0.634431	0.669786	0.669786	0.716314		0.779892	0.655759	0.770165
36.0016		0.529012			0.812019	1.02155			0.644962		0.614687	0.746339	0.709876	0.6764	0.746339	0.746339	0.722704		0.739941	0.697905	0.811243
36.2013		0.538992			0.829416	1.02553			0.613704		0.59771	0.679053	0.714638	0.653823	0.679053	0.679053	0.73357		0.771212	0.660244	0.787504
36.4017		0.569822			0.795766	0.997006			0.606863		0.688508	0.734026	0.70705	0.6239	0.734026	0.734026	0.772772		0.752063	0.629969	0.797009
36.6013		0.547359			0.820245	0.998844			0.631027		0.613184	0.685857	0.758276	0.623793	0.685857	0.685857	0.715696		0.715828	0.608096	0.839906
36.8018		0.553015			0.809095	0.950303			0.667719		0.634459	0.695176	0.750513	0.618081	0.695176	0.695176	0.671846		0.730531	0.671931	0.75981
37.0014		0.569915			0.816414	0.953462			0.675176		0.604886	0.706608	0.747058	0.622395	0.706608	0.706608	0.732691		0.730151	0.66414	0.82105
37.2018		0.540375			0.810289	0.949211			0.638097		0.612828	0.675935	0.707306	0.614636	0.675935	0.675935	0.702908		0.774558	0.655719	0.753288
37.4014		0.555686			0.828251	0.969488			0.625069		0.574412	0.763201	0.672005	0.645714	0.763201	0.763201	0.7309		0.751652	0.649994	0.782662
37.6019		0.550354			0.858561	0.957125			0.624632		0.577519	0.755772	0.714002	0.62671	0.755772	0.755772	0.745943		0.810146	0.639136	0.724891
37.8015		0.56299			0.784885	0.992605			0.633463		0.552682	0.704655	0.715119	0.647322	0.704655	0.704655	0.745092		0.793313	0.667801	0.781501

## Sheet: C88A
Time (s)	Cell2_1min_foci1	Cell2_3min_foci2	Cell2_4min_foci3	Cell2_6min_foci4	Cell3_8min_foci1	Cell3_10min_foci2	Cell3_12min_foci3	Cell4_16min_foci1	Cell4_18min_foci2	Cell4_20min_foci3	Cell4_22min_foci4	Cell5_31min_foci3	Cell5_31min_foci2	Cell5_30min_foci1	Cell6_35min_foci1	Cell6_36min_foci2	Cell6_39min_foci3	Cell7_42min_foci1	Cell7_44min_foci2	Cell7_46min_foci3	Cell8_52min_foci1	Cell8_53min_foci2	Cell8_55min_foci3	Cell8_57min_foci4
0	0	0	0	0	0	0	0	0	0	0	0	0	0	0	0	0	0	0	0	0	0	0	0	0
0.2014	0.041479	0.002687	0.031829	0.058962	0.058479	0.042291	0.030282	0.023305	0.06789	0.046125	0.061082	0.033291	0.0198	-0.00333	0.051865	0.051029	0.029075	0.036754	0.023766	0.027126	0.040296	0.052941	0.058945	0.056762
0.4016	0.074541	0.024447	0.06147	0.080248	0.085073	0.094408	0.070019	0.061046	0.073714	0.086418	0.079361	0.053295	0.022342	-0.00624	0.042902	0.087743	0.108155	0.070135	0.056076	0.022797	0.078414	0.099497	0.07376	0.108482
0.6015	0.120865	0.018372	0.107146	0.100424	0.118473	0.125433	0.103672	0.095146	0.107736	0.12761	0.111969	0.042787	0.047033	0.000517	0.082625	0.112775	0.132749	0.101241	0.089235	0.069333	0.109682	0.136371	0.114937	0.120314
0.8017	0.127498	0.05292	0.085438	0.147508	0.138666	0.148493	0.13975	0.128033	0.119123	0.13224	0.1253	0.057107	0.055575	0.010358	0.090462	0.153351	0.153647	0.095221	0.119035	0.095327	0.152455	0.138032	0.165708	0.187671
1.0015	0.146867	0.060464	0.123513	0.157285	0.153794	0.179618	0.160937	0.18504	0.176895	0.170856	0.151616	0.082503	0.061983	0.019793	0.089227	0.144621	0.163103	0.105894	0.109925	0.084373	0.168098	0.170625	0.175672	0.187416
1.2017	0.163974	0.06405	0.145426	0.158298	0.186035	0.189834	0.212298	0.206044	0.175465	0.188209	0.153747	0.074745	0.108245	0.039056	0.109418	0.192726	0.190901	0.121514	0.135077	0.114178	0.172044	0.160366	0.172614	0.190998
1.4016	0.181488	0.077444	0.172654	0.190197	0.198815	0.230963	0.212688	0.162844	0.202435	0.211294	0.156765	0.053244	0.114722	0.054389	0.140322	0.199362	0.220048	0.173221	0.163486	0.12175	0.241354	0.198446	0.207317	0.224903
1.6018	0.195536	0.068499	0.171721	0.19781	0.217935	0.23452	0.19409	0.194468	0.198744	0.231075	0.158523	0.081728	0.111494	0.051564	0.147604	0.208594	0.238491	0.197123	0.156281	0.160377	0.200882	0.221128	0.193964	0.239508
1.801	0.199132	0.054262	0.184006	0.229333	0.206699	0.237893	0.231407	0.215126	0.236989	0.236823	0.179904	0.104295	0.115404	0.076489	0.1581	0.233589	0.266396	0.198277	0.169537	0.189111	0.229418	0.223348	0.224506	0.24347
2.0018	0.236577	0.078144	0.182668	0.246252	0.231909	0.23875	0.240927	0.230705	0.2354	0.250295	0.212901	0.082906	0.151836	0.059191	0.176192	0.245239	0.295036	0.203981	0.191183	0.174824	0.267393	0.221302	0.229934	0.258933
2.2011	0.222298	0.104924	0.205665	0.248116	0.239699	0.259485	0.279051	0.221759	0.276797	0.283328	0.213111	0.084034	0.135663	0.082759	0.166956	0.230926	0.260289	0.2084	0.225287	0.18821	0.276478	0.25313	0.242097	0.298708
2.4013	0.2317	0.083569	0.206866	0.232912	0.268566	0.232949	0.278845	0.247145	0.274223	0.283502	0.193352	0.113356	0.161634	0.086326	0.202017	0.256247	0.33439	0.234956	0.234715	0.192629	0.284454	0.270106	0.248311	0.304585
2.6012	0.219426	0.084471	0.205948	0.261876	0.277058	0.291992	0.316211	0.241622	0.294937	0.324263	0.209729	0.105929	0.1335	0.1063	0.218201	0.257984	0.307351	0.240716	0.245361	0.20919	0.30572	0.298567	0.231501	0.31599
2.8014	0.221678	0.112848	0.215391	0.259764	0.303058	0.278323	0.308467	0.301987	0.324366	0.304401	0.207296	0.120917	0.188096	0.125512	0.214201	0.295234	0.309483	0.237708	0.241974	0.226046	0.332296	0.30687	0.296447	0.295357
3.0012	0.254723	0.094122	0.219956	0.297042	0.32209	0.342205	0.313803	0.253774	0.293313	0.335579	0.209007	0.137296	0.175904	0.10471	0.200098	0.319798	0.312584	0.24597	0.251528	0.252034	0.319834	0.282883	0.319445	0.299608
3.2014	0.286141	0.081661	0.218686	0.319686	0.31553	0.333413	0.317663	0.287278	0.330847	0.354851	0.229658	0.122009	0.192415	0.124208	0.194818	0.307709	0.326027	0.268624	0.259447	0.217226	0.320151	0.29653	0.347184	0.317126
3.4013	0.251713	0.104204	0.263801	0.300541	0.313582	0.333788	0.311277	0.293982	0.327051	0.351595	0.23302	0.145794	0.192057	0.105321	0.240256	0.293514	0.353427	0.302151	0.31117	0.219458	0.371826	0.349074	0.349389	0.309769
3.6015	0.273371	0.102479	0.256625	0.323627	0.338229	0.30815	0.370345	0.298091	0.303706	0.33606	0.2219	0.104432	0.203282	0.122579	0.227171	0.321734	0.409401	0.293546	0.329888	0.259271	0.364937	0.325012	0.300694	0.308326
3.8013	0.292491	0.080943	0.234891	0.321746	0.314021	0.371073	0.355386	0.339944	0.293807	0.363986	0.227206	0.134805	0.198617	0.092986	0.239524	0.351718	0.404199	0.316615	0.333943	0.276573	0.389482	0.329671	0.325507	0.319018
4.0016	0.312596	0.103878	0.244568	0.313464	0.33918	0.375071	0.363339	0.300749	0.361762	0.350641	0.236857	0.148452	0.242118	0.122465	0.223358	0.352117	0.367765	0.320833	0.352773	0.276523	0.411861	0.335969	0.325799	0.347306
4.2014	0.281193	0.112795	0.226006	0.338105	0.375168	0.400982	0.379537	0.304662	0.341899	0.366089	0.237205	0.141258	0.198957	0.144066	0.252051	0.362837	0.394658	0.305084	0.327509	0.295186	0.401265	0.338709	0.382413	0.338198
4.4016	0.273358	0.11747	0.253135	0.32927	0.347112	0.359295	0.439653	0.316543	0.424724	0.379787	0.252029	0.13937	0.222395	0.144258	0.24096	0.344818	0.392007	0.329296	0.382622	0.327369	0.435033	0.329005	0.381076	0.397761
4.6015	0.303405	0.100521	0.243432	0.318187	0.364388	0.397286	0.386308	0.353771	0.362876	0.380135	0.290894	0.157807	0.216013	0.153198	0.240882	0.361889	0.399418	0.297255	0.383582	0.319315	0.425496	0.334548	0.384935	0.370759
4.8017	0.280818	0.087512	0.25169	0.344286	0.357755	0.42347	0.439184	0.330516	0.345186	0.39742	0.273205	0.168092	0.240102	0.166633	0.276018	0.388358	0.398196	0.332618	0.359566	0.323054	0.409359	0.33854	0.440203	0.379997
5.0015	0.313654	0.11254	0.256266	0.353364	0.387899	0.383165	0.456452	0.377377	0.360885	0.367369	0.263784	0.172171	0.223655	0.153221	0.256609	0.384609	0.390563	0.317099	0.373119	0.325271	0.449878	0.365187	0.425058	0.370101
5.2017	0.317348	0.12598	0.264934	0.348565	0.386102	0.443994	0.450226	0.375063	0.400719	0.391635	0.241411	0.171383	0.270591	0.153762	0.23973	0.391959	0.430172	0.302214	0.338836	0.307706	0.448642	0.373337	0.414321	0.393333
5.4016	0.331178	0.140615	0.283421	0.343167	0.375917	0.412296	0.468491	0.38349	0.374289	0.37967	0.24012	0.173699	0.259058	0.180211	0.264458	0.389458	0.413027	0.347811	0.392185	0.347043	0.439109	0.387241	0.390246	0.412842
5.6018	0.328205	0.133212	0.303479	0.339209	0.393441	0.462561	0.500089	0.359537	0.353058	0.408764	0.241449	0.172261	0.274323	0.16947	0.251454	0.416348	0.431032	0.349134	0.34361	0.331393	0.464595	0.367699	0.390745	0.37851
5.8011	0.336826	0.12074	0.290073	0.323022	0.41635	0.440645	0.489524	0.393986	0.373696	0.389965	0.239654	0.194182	0.265326	0.190425	0.261925	0.411281	0.431506	0.363552	0.399141	0.312867	0.477696	0.37302	0.426468	0.41399
6.0019	0.370285	0.111112	0.290143	0.365501	0.398838	0.409818	0.51274	0.397705	0.402657	0.413379	0.270114	0.172157	0.257952	0.201715	0.260157	0.420406	0.418512	0.344355	0.360859	0.338491	0.48229	0.420521	0.394437	0.416676
6.2011	0.311276	0.111103	0.305975	0.349541	0.412751	0.414565	0.478605	0.408847	0.409289	0.42901	0.30249	0.168022	0.301201	0.216137	0.286258	0.404422	0.461266	0.343684	0.399499	0.371181	0.50005	0.390345	0.414386	0.432419
6.4013	0.367505	0.115436	0.288847	0.398349	0.427038	0.415869	0.450262	0.406353	0.454385	0.411936	0.289238	0.219812	0.28547	0.223042	0.28191	0.400368	0.489784	0.338907	0.419446	0.34006	0.514958	0.388859	0.473506	0.435501
6.6012	0.369229	0.133645	0.316627	0.316456	0.421496	0.404683	0.452195	0.409851	0.461887	0.425581	0.307539	0.191264	0.277851	0.218059	0.266816	0.389215	0.418536	0.379395	0.42053	0.358786	0.511732	0.416447	0.467756	0.432902
6.8014	0.380145	0.108723	0.310144	0.333009	0.444388	0.45252	0.491779	0.42887	0.472631	0.442607	0.312106	0.198036	0.285742	0.200889	0.304221	0.397216	0.435936	0.364422	0.447938	0.36717	0.50524	0.424186	0.441286	0.428524
7.0012	0.356056	0.121391	0.315085	0.314717	0.461786	0.447853	0.494034	0.425515	0.478857	0.454234	0.310916	0.204391	0.304771	0.190254	0.291103	0.435334	0.484719	0.365105	0.417435	0.375847	0.570511	0.418141	0.476272	0.469884
7.2015	0.391585	0.113363	0.3175	0.405182	0.419021	0.425132	0.50449	0.410094	0.433937	0.499943	0.324229	0.192838	0.312833	0.213653	0.31984	0.433883	0.496772	0.380991	0.433391	0.372964	0.534509	0.422405	0.480262	0.472122
7.4013	0.372523	0.127688	0.367763	0.368418	0.493272	0.460415	0.478219	0.458303	0.489356	0.496248	0.352489	0.199139	0.298026	0.211007	0.300714	0.429696	0.522401	0.383241	0.41442	0.386034	0.54107	0.397122	0.485461	0.461718
7.6015	0.377498	0.144527	0.33546	0.352363	0.448409	0.443207	0.487669	0.472932	0.470477	0.534931	0.343522	0.238662	0.30639	0.21692	0.299853	0.47369	0.5401	0.377355	0.433136	0.401703	0.538428	0.396148	0.468761	0.45403
7.8014	0.333363	0.128131	0.306341	0.378518	0.449413	0.45267	0.500302	0.419304	0.465096	0.485101	0.336546	0.222621	0.329715	0.21807	0.292527	0.474665	0.582361	0.37103	0.460052	0.416983	0.516591	0.398368	0.512636	0.486354
8.0016	0.381397	0.119253	0.326777	0.4014	0.45361	0.511249	0.528936	0.441762	0.456124	0.465787	0.330475	0.191098	0.298617	0.195495	0.2854	0.454313	0.637906	0.393475	0.470258	0.393156	0.56016	0.408948	0.491756	0.474999
8.2014	0.374167	0.124309	0.311211	0.396815	0.415629	0.452142	0.549451	0.452376	0.43875	0.523343	0.353377	0.245737	0.33834	0.217594	0.27851	0.453396	0.531802	0.459572	0.455464	0.446302	0.546155	0.431662	0.513296	0.506252
8.4016	0.384572	0.150958	0.325084	0.433526	0.459148	0.455322	0.525852	0.471898	0.445358	0.486364	0.375863	0.222528	0.371058	0.223358	0.318876	0.484498	0.570066	0.425306	0.44493	0.442962	0.538176	0.452159	0.51002	0.527727
8.6015	0.369735	0.149418	0.318857	0.394995	0.447105	0.494217	0.55079	0.474104	0.449619	0.52261	0.360986	0.226721	0.335109	0.214341	0.321714	0.492841	0.627369	0.44737	0.458928	0.455666	0.553165	0.441101	0.508268	0.544021
8.8017	0.369418	0.159686	0.348925	0.400236	0.478247	0.472532	0.52111	0.476454	0.514727	0.545022	0.358073	0.246946	0.375318	0.225895	0.30282	0.456524	0.567794	0.453821	0.447934	0.412379	0.574175	0.443435	0.528066	0.512396
9.0015	0.375189	0.139391	0.366734	0.385602	0.469974	0.480824	0.55848	0.490587	0.544298	0.517331	0.397844	0.25281	0.365055	0.243107	0.336197	0.464604	0.620741	0.423993	0.461252	0.42554	0.551045	0.427128	0.470098	0.517927
9.2018	0.37066	0.164305	0.358293	0.42039	0.502841	0.497691	0.530418	0.521862	0.537424	0.543143	0.404175	0.229304	0.347797	0.208729	0.327974	0.500433	0.601132	0.431536	0.443583	0.440034	0.53741	0.460388	0.485896	0.514468
9.401	0.368847	0.144487	0.363903	0.382077	0.486993	0.495399	0.540568	0.512869	0.468684	0.522941	0.389032	0.26195	0.390064	0.20438	0.337266	0.506795	0.597766	0.438203	0.47895	0.449851	0.550901	0.468488	0.502282	0.553169
9.6018	0.40927	0.142943	0.387059	0.417615	0.483346	0.51168	0.564701	0.467342	0.506047	0.540235	0.369992	0.263773	0.346846	0.185713	0.331672	0.526046	0.625061	0.452686	0.46974	0.454891	0.539365	0.49071	0.564384	0.571835
9.8011	0.390611	0.145546	0.372138	0.386746	0.46744	0.56471	0.579995	0.502885	0.494452	0.537049	0.406829	0.240208	0.330752	0.198004	0.355492	0.520688	0.687891	0.418322	0.462049	0.441461	0.512534	0.506488	0.487665	0.541802
10.0019	0.419212	0.171091	0.347689	0.424437	0.547771	0.528581	0.544822	0.517232	0.500567	0.554701	0.375726	0.271919	0.370159	0.222622	0.330985	0.522651	0.563457	0.445825	0.493931	0.49952	0.553381	0.498919	0.542171	0.588789
10.2011	0.411267	0.156226	0.354673	0.397914	0.544219	0.580107	0.554356	0.480466	0.550287	0.582971	0.433346	0.25942	0.403723	0.207276	0.356869	0.498917	0.595117	0.446993	0.481899	0.465821	0.548499	0.492922	0.528961	0.553096
10.4013	0.38895	0.166295	0.376748	0.404619	0.533456	0.534361	0.573403	0.489081	0.591551	0.510908	0.410675	0.277329	0.417224	0.205582	0.335165	0.535197	0.697596	0.437519	0.461304	0.466791	0.518638	0.530513	0.512064	0.547173
10.6012	0.39043	0.154179	0.364854	0.413248	0.485109	0.565479	0.569138	0.479211	0.576023	0.563425	0.418401	0.263097	0.391755	0.230747	0.332166	0.529321	0.581241	0.447719	0.473806	0.474693	0.57289	0.513616	0.548847	0.577404
10.8014	0.416323	0.152199	0.373106	0.410878	0.508328	0.517021	0.590486	0.481374	0.560986	0.544529	0.412427	0.24492	0.354083	0.233606	0.352972	0.511623	0.550451	0.466178	0.494636	0.464806	0.538476	0.518857	0.531888	0.591058
11.0012	0.437009	0.15331	0.390459	0.401299	0.504425	0.536661	0.588334	0.473295	0.564261	0.544593	0.44409	0.276626	0.403407	0.216269	0.342325	0.541325	0.63938	0.497689	0.49261	0.417233	0.572979	0.532228	0.563003	0.558489
11.2015	0.427222	0.167916	0.381958	0.413392	0.549878	0.550603	0.59786	0.446692	0.604664	0.621031	0.466732	0.243303	0.389913	0.243042	0.380514	0.552972	0.660525	0.48995	0.531765	0.450934	0.558092	0.516848	0.528358	0.587042
11.4013	0.430392	0.162925	0.366935	0.455285	0.511263	0.540826	0.603537	0.494061	0.556142	0.612692	0.455235	0.259644	0.413167	0.249126	0.372723	0.54964	0.648134	0.490865	0.480864	0.430454	0.523274	0.554565	0.530385	0.594137
11.6015	0.420986	0.156493	0.386032	0.457977	0.56025	0.564935	0.580488	0.503413	0.637487	0.602488	0.453338	0.256617	0.420783	0.246323	0.383109	0.510353	0.657197	0.509904	0.555221	0.436383	0.556854	0.512392	0.533398	0.606
11.8014	0.385343	0.15106	0.410945	0.415889	0.522302	0.569513	0.574163	0.530201	0.548511	0.593171	0.433778	0.292853	0.416089	0.247573	0.359979	0.541283	0.686182	0.522066	0.568309	0.458522	0.566325	0.500294	0.571521	0.560044
12.0016	0.412354	0.144573	0.378157	0.472236	0.476849	0.569914	0.612929	0.514607	0.589925	0.611901	0.475618	0.268525	0.380741	0.239344	0.369219	0.541889	0.771927	0.500795	0.532347	0.464078	0.566756	0.538224	0.543294	0.526655
12.2014	0.443528	0.158356	0.371947	0.478957	0.493105	0.576811	0.635678	0.491863	0.57921	0.568857	0.503614	0.279248	0.406496	0.250326	0.349968	0.527946	0.809891	0.527606	0.553832	0.47348	0.570867	0.492596	0.590781	0.579639
12.4016	0.434399	0.14639	0.40355	0.520554	0.535587	0.663221	0.655013	0.530668	0.619859	0.563339	0.487704	0.301005	0.40289	0.23556	0.376888	0.531028	0.788598	0.469867	0.544953	0.489937	0.57318	0.546571	0.55738	0.544731
12.6015	0.422043	0.151701	0.430578	0.462358	0.509951	0.60682	0.644205	0.541229	0.672102	0.586677	0.496434	0.283855	0.417627	0.251019	0.379366	0.527904	0.779158	0.561901	0.600029	0.474213	0.554683	0.522864	0.603159	0.579538
12.8017	0.438103	0.14452	0.42511	0.453114	0.560708	0.570465	0.617457	0.487618	0.69124	0.614744	0.473236	0.319087	0.437567	0.264211	0.390146	0.516801	0.736202	0.557354	0.556141	0.445305	0.584105	0.551926	0.531212	0.57637
13.0015	0.432119	0.154971	0.426785	0.475488	0.522793	0.601879	0.553093	0.504915	0.707896	0.595353	0.513975	0.285182	0.468797	0.266284	0.384925	0.515922	0.714533	0.542782	0.570475	0.47969	0.599277	0.588398	0.580514	0.606662
13.2013	0.413794	0.152956	0.459212	0.479398	0.546612	0.55969	0.582582	0.528326	0.701191	0.593974	0.530795	0.265914	0.447892	0.289599	0.390861	0.512205	0.711162	0.51139	0.538709	0.475134	0.599081	0.549438	0.587888	0.577332
13.4015	0.441387	0.167183	0.412959	0.478733	0.534385	0.635673	0.625207	0.487586	0.69875	0.600785	0.518867	0.257009	0.464847	0.281422	0.380462	0.521657	0.75944	0.479787	0.591982	0.492742	0.596643	0.530522	0.552493	0.58763
13.6014	0.419255	0.165928	0.447272	0.492133	0.530114	0.611519	0.580401	0.506254	0.737877	0.613861	0.517582	0.295978	0.454842	0.275261	0.392151	0.524062	0.715251	0.524174	0.576116	0.451453	0.592462	0.547526	0.547444	0.579292
13.8012	0.447185	0.176298	0.447391	0.481662	0.559348	0.641743	0.587203	0.522023	0.734226	0.570215	0.524788	0.292097	0.439781	0.286655	0.375394	0.541511	0.743788	0.51389	0.559791	0.505433	0.575452	0.5442	0.564808	0.554855
14.0014	0.424681	0.167569	0.434721	0.477039	0.533486	0.657861	0.616287	0.528215	0.718155	0.578252	0.507746	0.294308	0.432176	0.266534	0.384066	0.538071	0.649044	0.519094	0.578988	0.515383	0.603328	0.572288	0.572881	0.606071
14.2013	0.457718	0.153874	0.413188	0.484872	0.535047	0.611555	0.597052	0.490669	0.698595	0.599608	0.521822	0.322028	0.478528	0.242947	0.352515	0.588075	0.673455	0.525962	0.587821	0.503793	0.614446	0.526432	0.535675	0.642249
14.4015	0.483415	0.159285	0.43437	0.455878	0.559816	0.594888	0.608727	0.505133	0.777331	0.617494	0.549531	0.278622	0.44719	0.250837	0.384465	0.584431	0.604677	0.532502	0.63734	0.543311	0.613573	0.551939	0.573677	0.65882
14.6013	0.437421	0.186335	0.418138	0.442571	0.522119	0.614429	0.618679	0.525706	0.719672	0.615561	0.561622	0.278979	0.430389	0.247947	0.399035	0.573995	0.645867	0.479741	0.607903	0.531489	0.638735	0.520457	0.57924	0.605965
14.8015	0.458785	0.181461	0.423776	0.427442	0.536414	0.675367	0.607771	0.52253	0.762131	0.623346	0.556817	0.319303	0.443427	0.273314	0.391778	0.599466	0.613759	0.515852	0.63175	0.546652	0.647474	0.558686	0.621064	0.633188
15.0011	0.405028	0.151292	0.436499	0.448617	0.544961	0.60754	0.60891	0.449066	0.752089	0.628397	0.558126	0.285692	0.44455	0.25892	0.378673	0.590035	0.595013	0.516531	0.639012	0.541268	0.623826	0.50371	0.600324	0.63285
15.2016	0.460955	0.160815	0.468236	0.463776	0.54495	0.63642	0.635998	0.508619	0.769471	0.624764	0.575039	0.325044	0.495789	0.269579	0.373876	0.591572	0.585436	0.528006	0.67267	0.468481	0.621101	0.519691	0.559341	0.65589
15.4012	0.468609	0.133637	0.480157	0.47421	0.585334	0.615844	0.559957	0.487216	0.766356	0.600355	0.597289	0.328479	0.427721	0.298991	0.363203	0.556129	0.651338	0.537161	0.657611	0.555532	0.632024	0.534554	0.596935	0.664339
15.6016	0.511543	0.146995	0.434036	0.464969	0.570569	0.625158	0.594668	0.487471	0.741227	0.56173	0.608788	0.294865	0.46166	0.281452	0.392087	0.574221	0.569724	0.523381	0.60867	0.516121	0.61648	0.536127	0.593526	0.663291
15.8012	0.465921	0.179955	0.43168	0.449305	0.590938	0.624444	0.6316	0.518895	0.725541	0.576388	0.631742	0.322303	0.443822	0.293218	0.411126	0.569538	0.6253	0.561003	0.615555	0.553648	0.620789	0.551702	0.645046	0.649109
16.0017	0.465616	0.140958	0.465683	0.446417	0.566868	0.622757	0.585163	0.529073	0.727369	0.591183	0.601261	0.288251	0.480424	0.326188	0.391504	0.559078	0.616368	0.511115	0.615032	0.544456	0.623983	0.52178	0.615255	0.677599
16.2013	0.448568	0.168959	0.464677	0.430178	0.501273	0.586211	0.631866	0.500081	0.786536	0.619725	0.599719	0.310425	0.500976	0.305662	0.369044	0.584943	0.623054	0.566162	0.665051	0.588718	0.65179	0.507306	0.611187	0.679415
16.4017	0.466047	0.171738	0.469585	0.462669	0.560599	0.587152	0.590471	0.538287	0.715387	0.59614	0.59404	0.317835	0.463169	0.306059	0.370091	0.587312	0.629435	0.561447	0.663473	0.518763	0.636536	0.552447	0.612698	0.614107
16.6014	0.498773	0.164825	0.461738	0.437489	0.550276	0.644067	0.663404	0.54189	0.726132	0.593836	0.585114	0.297244	0.484697	0.304663	0.404553	0.603055	0.628684	0.56169	0.632905	0.543934	0.655477	0.564921	0.638628	0.614569
16.8018	0.50496	0.170227	0.44832	0.497758	0.492862	0.623477	0.694222	0.522191	0.71264	0.586014	0.573395	0.325157	0.492462	0.298369	0.404719	0.605066	0.637946	0.53692	0.630252	0.525299	0.644935	0.578562	0.595232	0.6326
17.0014	0.466362	0.178048	0.482353	0.496756	0.58162	0.60077	0.683729	0.521191	0.729668	0.592781	0.55712	0.35152	0.491384	0.287099	0.396778	0.601772	0.651717	0.523195	0.668073	0.544215	0.620404	0.622001	0.672655	0.646411
17.2019	0.477725	0.189174	0.419814	0.493383	0.527815	0.62849	0.709836	0.580208	0.698903	0.572186	0.585753	0.324042	0.456506	0.304964	0.388625	0.561807	0.643313	0.527136	0.671626	0.510255	0.688325	0.583095	0.63625	0.63613
17.4015	0.461456	0.172034	0.457613	0.513835	0.565955	0.627285	0.714472	0.58456	0.776262	0.599619	0.566966	0.328039	0.47703	0.333665	0.360403	0.58625	0.65082	0.511581	0.697096	0.541884	0.649553	0.550448	0.621288	0.643278
17.6013	0.509743	0.186993	0.460766	0.460615	0.537341	0.625179	0.689635	0.537943	0.761944	0.598675	0.575162	0.291448	0.502837	0.345517	0.380508	0.555668	0.647775	0.519426	0.671265	0.481907	0.639883	0.602446	0.635944	0.683118
17.8015	0.495989	0.184409	0.457958	0.525799	0.558921	0.624836	0.644721	0.531144	0.697159	0.571415	0.588659	0.317632	0.472582	0.338239	0.386997	0.549611	0.656335	0.55692	0.672769	0.485358	0.674621	0.535619	0.666326	0.672035
18.0014	0.508156	0.152694	0.460392	0.493795	0.56325	0.586483	0.687456	0.603387	0.753843	0.623413	0.566087	0.338096	0.482208	0.308873	0.384876	0.570505	0.713421	0.498057	0.653889	0.471855	0.662832	0.567754	0.610066	0.668582
18.2016	0.459235	0.181902	0.461501	0.516833	0.574217	0.615486	0.713506	0.54174	0.718559	0.605711	0.588514	0.360026	0.491163	0.321396	0.393323	0.587966	0.695857	0.503796	0.679394	0.442336	0.694344	0.551305	0.571177	0.691625
18.4014	0.561348	0.143411	0.464101	0.532838	0.560911	0.620028	0.698316	0.558602	0.75812	0.612792	0.597283	0.332688	0.509553	0.339216	0.408121	0.538976	0.661863	0.547176	0.644886	0.457954	0.695625	0.552968	0.612181	0.664317
18.601	0.539523	0.179715	0.490859	0.531816	0.593371	0.607107	0.664505	0.525666	0.746384	0.639398	0.589678	0.320692	0.452836	0.305689	0.394887	0.606798	0.697061	0.56176	0.666207	0.474484	0.645577	0.582686	0.618202	0.721668
18.8015	0.515496	0.147729	0.517312	0.497528	0.609133	0.582325	0.693099	0.521987	0.733444	0.661556	0.576849	0.31115	0.476472	0.328524	0.384925	0.57661	0.705215	0.540425	0.694911	0.501095	0.630313	0.544778	0.621168	0.736159
19.0011	0.537649	0.162322	0.503627	0.506025	0.583355	0.632443	0.722181	0.562599	0.768266	0.682963	0.574498	0.32626	0.470698	0.346394	0.404333	0.600976	0.647883	0.540814	0.700748	0.499331	0.677637	0.585457	0.661332	0.738483
19.2015	0.504437	0.167693	0.463729	0.500404	0.589563	0.601801	0.671223	0.549735	0.744061	0.647285	0.597285	0.35611	0.515177	0.338899	0.43423	0.556805	0.67975	0.547487	0.734799	0.497133	0.678126	0.526927	0.637357	0.698694
19.4012	0.50555	0.163384	0.450512	0.500992	0.553092	0.66633	0.71819	0.560537	0.731182	0.687195	0.602907	0.349168	0.483136	0.345591	0.389249	0.568023	0.668334	0.558987	0.696031	0.471338	0.627633	0.620339	0.624474	0.705516
19.6016	0.503737	0.163369	0.51019	0.52562	0.606162	0.621072	0.727755	0.527511	0.781257	0.660738	0.605734	0.310417	0.507542	0.360936	0.422259	0.583743	0.594224	0.54387	0.671537	0.45374	0.68606	0.586002	0.669746	0.767803
19.8012	0.511391	0.175546	0.508863	0.476015	0.598678	0.628676	0.723532	0.569709	0.744844	0.661961	0.56155	0.350882	0.512292	0.367232	0.369418	0.567308	0.656971	0.582308	0.684638	0.469677	0.704558	0.617317	0.631358	0.672319
20.0017	0.499983	0.183015	0.513116	0.472243	0.601001	0.663346	0.710173	0.550647	0.715508	0.70543	0.594137	0.339871	0.490486	0.378933	0.414929	0.583662	0.638988	0.580058	0.690391	0.509866	0.699738	0.673615	0.654455	0.682451
20.2013	0.508144	0.1599	0.494913	0.492448	0.597554	0.673249	0.716096	0.547768	0.7387	0.705962	0.604161	0.413995	0.569626	0.356021	0.400298	0.58897	0.59068	0.562291	0.683013	0.502628	0.686617	0.675722	0.657371	0.667499
20.4017	0.506227	0.163723	0.513625	0.508161	0.569031	0.675538	0.737964	0.560241	0.770133	0.691357	0.600267	0.362861	0.517737	0.371174	0.39837	0.603986	0.630387	0.565792	0.670207	0.532287	0.687741	0.615647	0.679367	0.666015
20.6013	0.477957	0.183637	0.518086	0.497328	0.580646	0.67284	0.781921	0.572538	0.805038	0.652539	0.634997	0.329444	0.520978	0.364891	0.425113	0.587602	0.571266	0.579928	0.720433	0.524377	0.698222	0.640813	0.698382	0.689625
20.8018	0.467501	0.176131	0.539843	0.494699	0.577311	0.65802	0.770922	0.575029	0.784027	0.659655	0.620244	0.349617	0.580524	0.375869	0.386096	0.571953	0.63288	0.596112	0.69875	0.505541	0.700279	0.585177	0.717802	0.705272
21.0014	0.489397	0.198049	0.524466	0.491917	0.590778	0.644463	0.727264	0.579228	0.793269	0.68234	0.606833	0.361787	0.549103	0.353658	0.442156	0.590702	0.615779	0.538807	0.703653	0.500839	0.704111	0.668568	0.695423	0.709514
21.2018	0.508531	0.195813	0.502097	0.509083	0.592218	0.622583	0.789351	0.621045	0.766942	0.669956	0.614982	0.393394	0.530071	0.359834	0.413687	0.589083	0.604562	0.599475	0.704007	0.542649	0.700575	0.644257	0.714692	0.696961
21.4015	0.498617	0.180559	0.494033	0.484686	0.613448	0.65734	0.719748	0.627678	0.75484	0.64538	0.637869	0.404275	0.548184	0.38503	0.370423	0.573332	0.645249	0.593054	0.658691	0.546243	0.727145	0.669116	0.671481	0.672756
21.6013	0.495758	0.175217	0.512664	0.514242	0.623247	0.688247	0.725403	0.556824	0.758803	0.660301	0.627356	0.367879	0.574502	0.376801	0.402741	0.615934	0.603356	0.57064	0.693665	0.530557	0.696349	0.661751	0.724371	0.679435
21.8015	0.482308	0.154145	0.491376	0.459001	0.606724	0.662505	0.747647	0.622953	0.773483	0.683414	0.675534	0.389115	0.543406	0.366808	0.392293	0.587416	0.646684	0.558679	0.692742	0.534278	0.732921	0.671012	0.742346	0.698608
22.0014	0.516982	0.183694	0.447044	0.483036	0.637372	0.665746	0.773534	0.604345	0.801251	0.645284	0.666322	0.418259	0.505021	0.364314	0.40194	0.564933	0.633291	0.561781	0.685825	0.548616	0.699885	0.68858	0.681173	0.659359
22.2016	0.535217	0.161566	0.534586	0.516693	0.578962	0.697812	0.777014	0.644312	0.823738	0.667597	0.658105	0.386415	0.509454	0.348019	0.401902	0.579296	0.712953	0.548357	0.690253	0.569366	0.715543	0.683787	0.714999	0.641422
22.4014	0.514245	0.160992	0.529735	0.511211	0.640673	0.661482	0.800543	0.604493	0.806298	0.662026	0.662579	0.399726	0.546544	0.363491	0.409934	0.553076	0.607394	0.547196	0.675121	0.524067	0.73063	0.689411	0.721125	0.63336
22.6011	0.537325	0.153395	0.553598	0.486272	0.641676	0.668274	0.7512	0.627509	0.794043	0.708245	0.672677	0.393189	0.598078	0.377843	0.416528	0.541343	0.623881	0.580784	0.698078	0.59305	0.681354	0.677158	0.698342	0.685786
22.8015	0.543635	0.175963	0.562514	0.528239	0.625842	0.694469	0.800021	0.615747	0.790053	0.664415	0.638693	0.423725	0.527018	0.392272	0.40315	0.59992	0.695732	0.593751	0.726805	0.519145	0.729221	0.681916	0.756189	0.721513
23.0011	0.525317	0.187766	0.535637	0.449227	0.588656	0.672807	0.775831	0.593056	0.771377	0.674966	0.608912	0.42668	0.552917	0.368473	0.399928	0.611595	0.618623	0.616209	0.727662	0.559943	0.699637	0.656041	0.729408	0.669281
23.2015	0.537742	0.159716	0.512414	0.514788	0.623261	0.719854	0.749014	0.62752	0.766058	0.67947	0.693591	0.386015	0.512838	0.387451	0.376404	0.605315	0.645716	0.613037	0.723899	0.561074	0.701282	0.676759	0.698489	0.676945
23.4012	0.517449	0.160361	0.510673	0.503108	0.548465	0.67388	0.740897	0.612754	0.833965	0.710192	0.679268	0.390296	0.562313	0.442077	0.400578	0.614775	0.619262	0.653679	0.715464	0.523188	0.69926	0.647733	0.695547	0.657276
23.6016	0.505264	0.16217	0.514771	0.468067	0.598038	0.685679	0.766884	0.650963	0.792501	0.694579	0.662066	0.388988	0.583136	0.415321	0.411727	0.624342	0.687389	0.620039	0.728813	0.591388	0.719622	0.673954	0.770292	0.657634
23.8012	0.538137	0.170157	0.486471	0.459368	0.624041	0.70416	0.753071	0.668129	0.778652	0.767403	0.670955	0.42592	0.570475	0.407763	0.429103	0.601519	0.61355	0.585565	0.724918	0.523482	0.731989	0.676395	0.775203	0.684233
24.0017	0.532633	0.188975	0.541489	0.506982	0.603388	0.682587	0.721852	0.679667	0.807735	0.716626	0.691828	0.369073	0.597223	0.419141	0.421167	0.611448	0.572257	0.614365	0.722187	0.535666	0.754385	0.664741	0.743659	0.670402
24.2013	0.542474	0.188462	0.486571	0.461839	0.638058	0.640762	0.795139	0.645799	0.858626	0.713552	0.667237	0.377789	0.543162	0.412067	0.420723	0.612418	0.578995	0.61332	0.725509	0.508842	0.739495	0.69962	0.737608	0.675065
24.4017	0.537289	0.165649	0.521852	0.487138	0.615277	0.652393	0.764333	0.668296	0.876944	0.755313	0.637279	0.433613	0.534318	0.429724	0.442954	0.605329	0.626667	0.610586	0.697807	0.528818	0.748533	0.699104	0.774045	0.72239
24.6014	0.514606	0.185562	0.502114	0.480417	0.593063	0.702581	0.721397	0.618191	0.851394	0.774947	0.640711	0.436449	0.545336	0.459262	0.4074	0.665361	0.605477	0.562547	0.728012	0.528172	0.747334	0.706302	0.760256	0.695236
24.8018	0.541692	0.172485	0.530231	0.514219	0.591413	0.686265	0.754915	0.668932	0.827629	0.750731	0.607452	0.398785	0.556076	0.414425	0.405852	0.65147	0.63735	0.604144	0.711833	0.547092	0.71835	0.66693	0.800964	0.669267
25.0014	0.504232	0.194494	0.539817	0.512126	0.580028	0.667283	0.782638	0.666395	0.861755	0.74373	0.624028	0.4118	0.567355	0.411253	0.43887	0.637489	0.622886	0.615313	0.688615	0.529747	0.752133	0.706212	0.744191	0.627516
25.2018	0.50031	0.176308	0.541031	0.520405	0.564366	0.677239	0.779521	0.661555	0.81625	0.721119	0.629749	0.427215	0.538906	0.402132	0.442949	0.624692	0.637376	0.611743	0.720421	0.56694	0.730226		0.769804	0.656007
25.4015	0.525006	0.195202	0.553534	0.478041	0.602201	0.664158	0.768184	0.652672	0.828097	0.763308	0.62898	0.445087	0.55057	0.392606	0.431524	0.607534	0.612031	0.625414	0.747923	0.534953			0.755736	0.69773
25.6013	0.533549	0.190553	0.56816	0.494933	0.56662	0.701775	0.726165	0.671481	0.807788	0.700635	0.609375	0.434373	0.578515	0.421037	0.441517	0.581581	0.623831	0.627609	0.724208	0.531358			0.72397	0.646896
25.8015	0.535924	0.16789	0.540958	0.483589	0.588707	0.684146	0.736622	0.646537	0.815226	0.756799	0.641786	0.425288	0.609446	0.431808	0.416433	0.599397	0.648787	0.662869	0.685202	0.509422			0.726608	0.631539
26.0014	0.542732	0.197616	0.533909	0.513161	0.586951	0.685754	0.694348	0.669869	0.810644	0.732235	0.628372	0.466429	0.591625	0.39646	0.425586	0.554188	0.601615	0.67537	0.71429	0.540923			0.769093	0.674494
26.201	0.533603	0.204554	0.57704	0.516321	0.590451	0.708824	0.720611	0.676648	0.827935	0.715996	0.704287	0.455786	0.541499	0.402688	0.442612	0.620193	0.679547	0.665718	0.72082	0.50513			0.795418	0.68531
26.4014	0.53292	0.163358	0.575049	0.464419	0.631464	0.765287	0.745133	0.636994	0.829612	0.689074	0.681785	0.424569	0.54664	0.415755	0.443285	0.621095	0.706862	0.612689	0.73517	0.541304			0.708951	0.699693
26.6011	0.559576	0.19632	0.558634	0.529243	0.598314	0.744242	0.689218	0.703202	0.839217	0.775287	0.70012	0.451586	0.54035	0.433358	0.452541	0.633059	0.675049	0.666089	0.76785	0.514209			0.77094	0.675414
26.8015	0.560535	0.194679	0.556014	0.545482	0.591461	0.746122	0.703299	0.685624	0.773436	0.715765	0.644302	0.409599	0.555974	0.400185	0.436289	0.630075	0.705807	0.630838	0.742491	0.571805			0.774922	0.739826
27.0011	0.5583	0.194105	0.531578	0.508004	0.603971	0.762066	0.684295	0.698439	0.840811	0.735762	0.689027	0.459978	0.572029	0.422966	0.440308	0.701476	0.680163	0.636809	0.740513	0.515982			0.789813	0.689219
27.2016	0.608152	0.154991	0.563663	0.519354	0.562517	0.745764	0.67766	0.673123	0.833806	0.735771	0.613949	0.439359	0.583079	0.408632	0.463566	0.699573	0.759901	0.670671	0.73683	0.568888			0.74562	0.684265
27.4012	0.569804	0.184874	0.536399	0.491436	0.604355	0.781295	0.746022	0.699186	0.81223	0.746768	0.649098	0.443551	0.565529	0.404744	0.462964	0.708072	0.73611	0.694444	0.759531	0.588567			0.806775	0.691888
27.6016	0.591048	0.180253	0.556649	0.514349	0.545157	0.687242	0.680797	0.69564	0.768599	0.751142	0.666217	0.438341	0.615755	0.446834	0.417086	0.675302	0.730472	0.720581	0.764696	0.541413			0.779077	0.68187
27.8012	0.577671	0.213361	0.58001	0.501412	0.616898	0.807565	0.747426	0.703254	0.809856	0.734737	0.65054	0.427115	0.608289	0.424205	0.444372	0.648077	0.739708	0.672309	0.772704	0.613152			0.793254	0.722164
28.0017	0.588932	0.198702	0.575549	0.492155	0.660429	0.751751	0.735951	0.682976	0.792565	0.771436	0.674769	0.433514	0.580836	0.423428	0.455762	0.696693	0.705773	0.64157	0.750258	0.577621			0.810385	0.683505
28.2013	0.553913	0.201981	0.555243	0.539545	0.568102	0.756831	0.74414	0.642336	0.829147	0.715717	0.701017	0.383826	0.653208	0.41011	0.453341	0.668087	0.626892	0.674195	0.823464	0.559931			0.777954	0.69562
28.4017	0.587295	0.198988	0.557466	0.455317	0.60913	0.745541	0.805095	0.662097	0.817304	0.748111	0.662631	0.408918	0.646787	0.394247	0.453294	0.683997	0.613199	0.703294	0.786241	0.591588			0.805093	0.707106
28.6014	0.571579	0.173633	0.59147	0.467279	0.564747	0.793892	0.750144	0.734594	0.835895	0.76136	0.703648	0.380108	0.633803	0.406146	0.460225	0.659766	0.616201	0.725476	0.805662	0.603464			0.728368	0.667134
28.8018	0.592253	0.214225	0.589637	0.4668	0.622881	0.765707	0.738028	0.7101	0.801468	0.759121	0.703135	0.428238	0.584638	0.405736	0.457061	0.667815	0.55096	0.703502	0.762636	0.527126			0.749325	0.660509
29.0014	0.582412	0.186059	0.603167	0.469078	0.566306	0.713481	0.732035	0.654208	0.801965	0.745943	0.682233	0.445403	0.61252	0.409835	0.46665	0.676432	0.623124	0.697856	0.798251	0.571412			0.775733	0.67605
29.2019	0.566653	0.182208	0.589141		0.563207	0.717493	0.675152	0.674931	0.842677	0.734811	0.657318	0.433293	0.631159	0.400851	0.474939	0.680799	0.631147	0.68953	0.755235	0.547228			0.780893	0.656644
29.4015	0.571264	0.213601	0.565575		0.582498	0.688071	0.707474	0.683312	0.812756	0.713153	0.711031	0.414175	0.601637	0.434711	0.430959	0.653681	0.640383	0.680068	0.776007	0.532214			0.746157	0.646541
29.6013	0.564804	0.157573	0.551353		0.55188	0.697991	0.727366	0.669411	0.8536	0.726518	0.68259	0.428931	0.609517	0.459143	0.437793	0.659718	0.709181	0.734963	0.758228	0.571944			0.799888	0.641828
29.8015	0.570528	0.193263	0.538295		0.586644	0.735758	0.782654	0.695161	0.857421	0.715443	0.654849	0.375469	0.598194	0.410876	0.441022	0.626903	0.727089	0.716978	0.723984	0.57392			0.754168	0.658557
30.0014	0.558237	0.177187	0.587059		0.590922	0.767137	0.716796	0.658845	0.893892	0.753789	0.65491	0.451959	0.613896	0.432162	0.446153	0.661675	0.679481	0.68571	0.758311	0.549002			0.759093	0.683943
30.201	0.584367	0.179629	0.554544		0.572339	0.757449	0.721879	0.628694	0.893387	0.755569	0.706565	0.45016	0.600505	0.460237	0.493307	0.648977	0.689277	0.652277		0.563294			0.746512	0.6824
30.4015	0.558832	0.191218	0.587816		0.584346	0.739472	0.720716	0.646654	0.877763	0.759685	0.682535	0.407898	0.645799	0.438232	0.489845	0.643941	0.674079	0.705509		0.574285			0.827654	0.681691
30.6011	0.573818	0.195163	0.597828		0.588218	0.750076	0.719597	0.635654	0.878597	0.688775		0.462004	0.583355	0.458944	0.464064	0.618936	0.659668	0.689505		0.565819			0.780839	0.684689
30.8015	0.548321	0.193039	0.61405		0.619583	0.752327	0.731361	0.654363	0.827273	0.769878		0.433956	0.580725	0.441839	0.479003	0.63188	0.62576	0.733112		0.589128			0.734868	0.69826
31.0011	0.544155	0.193647	0.630862		0.607158	0.724023	0.707999	0.628185	0.84836	0.755755		0.437831	0.658723	0.439367	0.509864	0.642733	0.604356	0.677106		0.571678			0.778583	0.708841
31.2015	0.584332	0.19066	0.574426		0.611492	0.781691	0.729217	0.61793	0.853456	0.731476		0.45298	0.613677	0.420522	0.468914	0.664307	0.614294	0.724909		0.637288			0.755606	0.743703
31.4012	0.603135	0.191133	0.573291		0.611997	0.73743	0.753604	0.579082	0.888488	0.7302		0.428534	0.625883	0.430504	0.508651	0.654024	0.679928	0.708837		0.605188			0.754783	0.75336
31.6016	0.588312	0.196867	0.598471		0.599074	0.802078	0.713141	0.631914	0.896399	0.696618		0.440583	0.626226	0.434605	0.48419	0.639787	0.648576	0.737474		0.626223			0.722401	0.75479
31.8012	0.585119	0.19432	0.603308		0.596814	0.720236	0.720724	0.667701	0.832585	0.686665		0.387393	0.624658	0.478685	0.494288	0.703032	0.617891	0.67171		0.571123			0.820435	0.741301
32.0017	0.564669	0.184173	0.614927		0.545503	0.751351	0.743729	0.631149	0.905637	0.709723		0.428629	0.657702	0.473899	0.513607	0.663789	0.695535	0.706855		0.617577			0.830797	0.764893
32.2013	0.553789	0.166054	0.616193		0.609845	0.729355	0.759509	0.625454	0.879793	0.679332		0.440994	0.639424	0.47089	0.518939	0.652131	0.688612	0.669638		0.628105			0.831474	0.695739
32.4017	0.575566	0.185395	0.624638		0.579983	0.735936	0.731325	0.616068	0.905931	0.718223		0.412904	0.604431	0.421081	0.488347	0.637674	0.672155	0.702516		0.596717			0.839194	0.725921
32.6013	0.587152	0.201701	0.595189		0.560574	0.764193	0.747653	0.581604	0.839596	0.71019		0.419991	0.637706	0.455648	0.520066	0.686021	0.712604	0.723056		0.638331			0.848638	0.707599
32.8018	0.580523	0.191353	0.596604		0.605937	0.794211	0.695015	0.667483	0.901939	0.719863		0.475445	0.607661	0.443074	0.506881	0.673329	0.658313	0.682227		0.605753			0.814836	0.706798
33.0014	0.592466	0.189006	0.602649		0.585765	0.774261	0.777613	0.662708	0.824525	0.669599		0.441742	0.578594	0.46649	0.504606	0.650439	0.606802	0.704304		0.545838			0.803763	0.68637
33.2018	0.58255	0.200989	0.588457		0.602381	0.788699	0.830597	0.661948	0.871485	0.697301		0.4116	0.593172	0.437869	0.553267	0.655735	0.589934	0.736816		0.566184			0.804362	0.769624
33.4015	0.586812	0.195586	0.621496		0.6195	0.738413	0.874143	0.643896	0.851156	0.7174		0.473389	0.66217	0.435224	0.522809	0.627279	0.62063	0.684452		0.577879			0.785288	0.724988
33.6013	0.582046	0.197897	0.612889		0.643509	0.728866	0.841665	0.664219	0.885564	0.76046		0.474288	0.638316	0.449714	0.530028	0.632231	0.635983	0.733938		0.536452			0.823789	0.735467
33.8015	0.596858	0.165932	0.616849		0.600882	0.740582	0.794853	0.726458	0.881577	0.736838		0.433914	0.670271	0.431531	0.510021	0.641147	0.552178	0.769311		0.540418			0.876742	0.745012
34.0014	0.609376	0.203694	0.608215		0.624972	0.742057	0.791984	0.652539	0.880845	0.766492		0.443916	0.649987	0.468959	0.510234	0.624553	0.585415	0.750169		0.593158			0.808329	0.712108
34.2016	0.634839	0.190445	0.603435		0.623779	0.70477	0.737356	0.660581	0.834439	0.671494		0.473637	0.667336	0.439738	0.480788	0.621623	0.539547	0.781905		0.556071			0.848492	0.719063
34.4014	0.604091	0.182038	0.595384		0.672654	0.720728	0.775275	0.68646	0.829031	0.709009		0.436941	0.679193	0.480831	0.465254	0.631339	0.573734	0.738356		0.529906			0.816997	0.69673
34.6011	0.603092	0.183085	0.573303		0.626949	0.734565	0.768794	0.670939	0.828195	0.718835		0.414083	0.621872	0.462164	0.500855	0.647757	0.567104	0.756155		0.578871			0.793008	0.707388
34.8015	0.60298	0.193444	0.617193		0.638005	0.757243	0.767646	0.689749	0.819471	0.729689		0.438772	0.669775	0.45017	0.497242	0.661481	0.581991	0.767495		0.567833			0.776741	0.679974
35.0011	0.627886	0.219382	0.61314		0.632724	0.79141	0.75973	0.647319		0.749973		0.448674	0.633418	0.450298	0.517421	0.640551	0.660238	0.788124		0.585742			0.847428	0.710818
35.2015	0.612254	0.195529	0.632046		0.622348	0.746591	0.749401	0.668287		0.770817		0.449719	0.615049	0.479593	0.52667	0.693913	0.59249			0.614995			0.79648	0.693949
35.4011	0.636698	0.197468	0.588393		0.658677	0.76117	0.696818	0.646839		0.746561		0.460944	0.60144	0.477515	0.553046	0.693997	0.587029			0.553346			0.836758	0.704728
35.6016	0.6001	0.181964	0.599545		0.623429	0.747885	0.752321	0.656031		0.70869		0.408455	0.63445	0.481265	0.518972	0.696554	0.659012			0.613605			0.791384	0.741979
35.8012	0.646361	0.184701	0.618059		0.652428	0.794035	0.811397	0.658695		0.795494		0.425681	0.663099	0.50889	0.512981	0.733133	0.620156			0.568628			0.803017	0.725771
36.0016	0.568819	0.206331	0.606305		0.641187	0.751723	0.830201	0.635867		0.791327		0.462275	0.606824	0.482186	0.502182	0.697146	0.551946			0.643412			0.787171	0.692443
36.2013	0.601261	0.168046	0.572547		0.661714	0.741533	0.8693	0.702445		0.706513		0.431379	0.625641	0.471672	0.514269	0.688798	0.524314			0.608051			0.756475	0.716907
36.4017	0.6138	0.186172	0.637978		0.648531	0.74776	0.855173	0.669209		0.733498		0.455343	0.598355	0.509405	0.53319	0.70653	0.560563			0.621592			0.786456	0.686168
36.6013	0.651315	0.17445	0.607755		0.59963	0.74285	0.759925	0.668215		0.773853		0.461492	0.675873	0.49409	0.509055	0.717282	0.57978			0.654988			0.794298	0.683763
36.8018	0.620482	0.195636	0.621327		0.635171	0.779777	0.841138	0.706208		0.728162		0.442853	0.632539	0.50846	0.521359	0.677964	0.549599			0.618993			0.7617	0.680551
37.0014	0.596116	0.184611	0.59925		0.629613	0.821602	0.816111	0.701969		0.738656		0.473229	0.654313	0.477634	0.519786	0.676489	0.567752			0.66186			0.745375	0.74556
37.2018	0.602577	0.192686	0.589953		0.65578	0.785809	0.806044	0.687065		0.694793		0.455685	0.61257	0.492813	0.517066	0.705834	0.62277			0.61681			0.77204	0.696353
37.4014	0.622819	0.216006	0.614653		0.609525	0.744713	0.786084	0.685899		0.736466		0.464272	0.667588	0.450182	0.508507	0.712974	0.625712			0.60692			0.807574	0.717822
37.6019	0.587523	0.197745	0.611523		0.589922	0.824462	0.813706	0.68823		0.743605		0.450051	0.651496	0.465602	0.507952	0.689287	0.57842			0.668585			0.842226	0.775235
37.8015	0.607927	0.217415	0.616318		0.583365	0.831952	0.85323	0.711256		0.752191		0.440563	0.629002	0.455122	0.541318	0.683947	0.561448			0.645772			0.766175	0.775948

## Sheet: EWI
Time (s)	Cell2_6min_foci1	Cell2_8min_foci2	Cell2_9min_foci3	Cell2_11min_foci4	Cell3_15min_foci1	Cell3_17min_foci2	Cell3_19min_foci3	Cell4_21min_foci1	Cell4_22min_foci2	Cell4_24min_foci3	Cell6_32min_foci1	Cell6_34min_foci2	Cell6_36min_foci3	Cell7_43min_foci1	Cell7_45min_foci2	Cell7_46min_foci3	Cell9_51min_foci1	Cell9_53min_foci2	Cell9_55min_foci3	Cell10_58min_foci1	Cell10_60min_foci2	Cell10_60min_foci3
0	0	0	0	0	0	0	0	0	0	0	0	0	0	0	0	0	0	0	0	0	0	0
0.2014	0.042975	0.008262	0.008262	0.066452	0.063391	0.068985	0.050394	0.088536	0.037694	0.108986	0.043647	0.098258	0.06169	0.080711	0.101409	0.108523	0.074735	0.081942	0.044805	0.058114	0.034973	0.059158
0.4016	0.070844	0.086881	0.086881	0.099093	0.153767	0.142819	0.121987	0.148048	0.10382	0.175724	0.082015	0.12076	0.11842	0.067564	0.106969	0.11838	0.123725	0.130727	0.091922	0.084259	0.047973	0.1124
0.6015	0.079514	0.11708	0.11708	0.116453	0.182481	0.154144	0.147659	0.149019	0.128977	0.240812	0.113851	0.098183	0.12657	0.136804	0.0942	0.091375	0.149121	0.157554	0.126203	0.132724	0.045644	0.119499
0.8017	0.129107	0.130164	0.130164	0.172922	0.20508	0.195188	0.238769	0.204874	0.203785	0.282614	0.152079	0.17356	0.243511	0.147115	0.168747	0.170327	0.22427	0.188584	0.210445	0.154528	0.09269	0.147392
1.0015	0.161333	0.19568	0.19568	0.220842	0.203198	0.208149	0.185573	0.260694	0.207568	0.333367	0.150531	0.152104	0.206458	0.195785	0.14137	0.138729	0.234569	0.207824	0.184587	0.173009	0.144448	0.196235
1.2017	0.155297	0.226134	0.226134	0.218533	0.265699	0.233589	0.243718	0.332918	0.266081	0.333305	0.192088	0.219914	0.266872	0.229864	0.250694	0.168009	0.239606	0.227183	0.232662	0.188919	0.176442	0.170851
1.4016	0.136935	0.202955	0.202955	0.253757	0.290978	0.271459	0.269876	0.325829	0.279719	0.371523	0.195722	0.251563	0.296934	0.204243	0.179288	0.14145	0.287107	0.258139	0.232285	0.224824	0.196048	0.238868
1.6018	0.189526	0.223916	0.223916	0.280692	0.321045	0.300174	0.232289	0.367135	0.299982	0.392191	0.209283	0.287018	0.328061	0.28144	0.182639	0.199132	0.287319	0.304484	0.262647	0.219546	0.23035	0.245434
1.801	0.196598	0.271458	0.271458	0.292349	0.322561	0.365741	0.302744	0.400631	0.345257	0.395466	0.213588	0.292235	0.327088	0.298763	0.295636	0.30042	0.30273	0.33595	0.294581	0.266197	0.206676	0.287451
2.0018	0.205158	0.262606	0.262606	0.291962	0.338671	0.334391	0.33797	0.403882	0.331352	0.385024	0.221708	0.283083	0.31308	0.278533	0.333577	0.26532	0.339755	0.307772	0.314719	0.264774	0.270709	0.366065
2.2011	0.24362	0.258907	0.258907	0.293317	0.399959	0.347064	0.35114	0.438072	0.388906	0.414785	0.283394	0.269534	0.305128	0.299164	0.278665	0.281993	0.351794	0.389679	0.318762	0.295445	0.252972	0.309089
2.4013	0.263276	0.330577	0.330577	0.320603	0.392544	0.383571	0.354363	0.459446	0.385544	0.439341	0.254834	0.326373	0.357316	0.295052	0.25479	0.310721	0.325851	0.369294	0.383461	0.327884	0.285104	0.298341
2.6012	0.274941	0.333107	0.333107	0.315748	0.402858	0.406113	0.426204	0.464467	0.378627	0.466757	0.283833	0.302311	0.363716	0.317573	0.242822	0.326558	0.32466	0.331888	0.357065	0.319451	0.311843	0.29438
2.8014	0.276032	0.322182	0.322182	0.355259	0.408522	0.433759	0.455854	0.488714	0.40582	0.446041	0.261568	0.342568	0.414888	0.345428	0.338106	0.377613	0.340398	0.366853	0.336364	0.328071	0.302719	0.397482
3.0012	0.256291	0.310407	0.310407	0.350835	0.413009	0.416642	0.401636	0.529889	0.46792	0.503185	0.304164	0.332314	0.476419	0.356398	0.313233	0.41808	0.363488	0.434265	0.346698	0.371279	0.28214	0.419318
3.2014	0.295238	0.349231	0.349231	0.384819	0.420152	0.411174	0.412903	0.470651	0.51618	0.533092	0.275109	0.326781	0.429151	0.387544	0.375641	0.308026	0.405454	0.411364	0.395354	0.413533	0.339116	0.431616
3.4013	0.289598	0.305591	0.305591	0.370762	0.407724	0.486016	0.49704	0.496432	0.501271	0.540362	0.304046	0.371542	0.458449	0.397138	0.291817	0.442354	0.443145	0.418553	0.390191	0.399294	0.352524	0.431178
3.6015	0.286397	0.371147	0.371147	0.38688	0.43744	0.459581	0.490352	0.529311	0.466655	0.4844	0.300014	0.380465	0.474991	0.436209	0.335948	0.400903	0.446053	0.428614	0.449802	0.356229	0.366893	0.417824
3.8013	0.290034	0.350635	0.350635	0.382667	0.40873	0.498263	0.451367	0.519456	0.557433	0.54672	0.293787	0.371343	0.471062	0.39347	0.361024	0.364019	0.416757	0.439512	0.421157	0.356323	0.359749	0.440097
4.0016	0.31054	0.370805	0.370805	0.430571	0.416933	0.489067	0.456971	0.569242	0.518553	0.575718	0.321577	0.398441	0.449328	0.421541	0.359167	0.494108	0.394252	0.442977	0.39443	0.385702	0.355942	0.474577
4.2014	0.313049	0.360233	0.360233	0.425279	0.439337	0.472383	0.48527	0.538162	0.545428	0.572744	0.319367	0.38223	0.410851	0.428984	0.397579	0.449844	0.471549	0.458187	0.423344	0.379563	0.394996	0.515506
4.4016	0.318896	0.409597	0.409597	0.43914	0.447691	0.463219	0.454489	0.508557	0.55369	0.585363	0.350721	0.383784	0.544064	0.476998	0.417001	0.491408	0.425636	0.480465	0.423341	0.406097	0.358291	0.484802
4.6015	0.330732	0.376656	0.376656	0.49004	0.444024	0.506143	0.557446	0.557772	0.588471	0.610482	0.361554	0.446127	0.480677	0.43936	0.437092	0.429211	0.43167	0.486213	0.393572	0.434735	0.399373	0.502989
4.8017	0.296946	0.387292	0.387292	0.457493	0.440619	0.527218	0.534558	0.504126	0.564579	0.560144	0.352363	0.38158	0.443697	0.413534	0.399225	0.488818	0.432925	0.446458	0.437475	0.458455	0.426914	0.479566
5.0015	0.356823	0.442472	0.442472	0.465117	0.447475	0.541258	0.546706	0.516575	0.555203	0.582331	0.33977	0.406905	0.44091	0.423511	0.415651	0.44045	0.43715	0.469253	0.425809	0.457798	0.433425	0.510465
5.2017	0.347728	0.410319	0.410319	0.456347	0.491914	0.518153	0.5488	0.529295	0.581596	0.647319	0.349829	0.391275	0.490876	0.504058	0.376068	0.502413	0.474369	0.450465	0.410884	0.424551	0.482214	0.505696
5.4016	0.35917	0.409695	0.409695	0.434789	0.496434	0.545239	0.527531	0.568906	0.639497	0.578421	0.343638	0.476327	0.504431	0.533466	0.371814	0.548964	0.439966	0.508337	0.422325	0.437415	0.4231	0.533179
5.6018	0.3962	0.440119	0.440119	0.438513	0.516396	0.534214	0.572767	0.555884	0.610416	0.623546	0.396997	0.473275	0.563556	0.480123	0.431325	0.582958	0.51331	0.514253	0.394668	0.457336	0.446482	0.519396
5.8011	0.382748	0.45909	0.45909	0.442653	0.522606	0.502546	0.573073	0.572401	0.597912	0.657643	0.399194	0.386952	0.474782	0.472095	0.376442	0.470335	0.494474	0.557095	0.452035	0.517609	0.481998	0.488547
6.0019	0.406111	0.480262	0.480262	0.445456	0.515306	0.567988	0.567393	0.594442	0.62163	0.651835	0.391403	0.470998	0.512584	0.501326	0.431159	0.649807	0.473492	0.53588	0.41129	0.472488	0.443022	0.548505
6.2011	0.387962	0.463462	0.463462	0.464096	0.558392	0.5463	0.573541	0.636081	0.663003	0.615049	0.404083	0.509364	0.528992	0.480752	0.431206	0.521591	0.442542	0.565577	0.441353	0.466504	0.473526	0.543631
6.4013	0.376196	0.477298	0.477298	0.493186	0.543944	0.537283	0.536632	0.610599	0.676356	0.609327	0.345777	0.495531	0.507482	0.498823	0.475795	0.614897	0.484811	0.541425	0.444561	0.463217	0.436179	0.566646
6.6012	0.354307	0.479747	0.479747	0.510625	0.564175	0.568036	0.524228	0.629886	0.702682	0.621404	0.340719	0.443324	0.529878	0.433326	0.479198	0.554134	0.526313	0.486401	0.41009	0.450811	0.416898	0.544258
6.8014	0.359116	0.481709	0.481709	0.458919	0.553854	0.549358	0.560041	0.622659	0.675937	0.644909	0.39408	0.413917	0.516533	0.447089	0.466452	0.630289	0.497426	0.582192	0.415361	0.477789	0.464859	0.611917
7.0012	0.370943	0.482883	0.482883	0.513466	0.53111	0.590587	0.542781	0.675673	0.707569	0.617429	0.341165	0.510701	0.559453	0.44663	0.454723	0.561917	0.495485	0.600111	0.476042	0.512667	0.485813	0.638732
7.2015	0.370957	0.479853	0.479853	0.506638	0.564376	0.608149	0.562543	0.64313	0.713333	0.600281	0.384125	0.436624	0.560711	0.496612	0.492156	0.614065	0.515916	0.60586	0.465148	0.489186	0.484474	0.611588
7.4013	0.386386	0.491071	0.491071	0.505001	0.549169	0.617853	0.523542	0.638889	0.668473	0.664403	0.396006	0.473175	0.545333	0.45493	0.520017	0.561381	0.583988	0.544162	0.479883	0.523495	0.498392	0.58217
7.6015	0.383502	0.51971	0.51971	0.533189	0.53341	0.619206	0.612326	0.592584	0.706808	0.610441	0.392803	0.564259	0.566645	0.484054	0.515507	0.617872	0.512198	0.605502	0.462573	0.478298	0.499495	0.650323
7.8014	0.43457	0.507132	0.507132	0.535326	0.569594	0.601417	0.604344	0.616339	0.74195	0.59588	0.379471	0.490641	0.544815	0.463978	0.553472	0.650865	0.544266	0.637528	0.452634	0.534115	0.439568	0.650704
8.0016	0.449824	0.564064	0.564064	0.480769	0.574004	0.572786	0.576523	0.668878	0.77588	0.61908	0.404398	0.505879	0.567711	0.487553	0.500226	0.598878	0.506552	0.565452	0.463991	0.518191	0.507922	0.636515
8.2014	0.422139	0.532399	0.532399	0.535561	0.57949	0.641035	0.683528	0.677018	0.75915	0.626592	0.444746	0.47865	0.654076	0.526728	0.437139	0.654275	0.478588	0.595911	0.495023	0.531158	0.494902	0.651151
8.4016	0.42186	0.561809	0.561809	0.518219	0.556509	0.600441	0.645423	0.690946	0.816129	0.600269	0.42442	0.519241	0.629401	0.52462	0.485077	0.593055	0.467555	0.588139	0.465493	0.553289	0.430489	0.630353
8.6015	0.430538	0.536269	0.536269	0.573794	0.59007	0.59927	0.665615	0.707746	0.813797	0.585658	0.450904	0.546778	0.637303	0.50056	0.474979	0.66163	0.443609	0.604294	0.519548	0.530025	0.46751	0.617745
8.8017	0.4198	0.500529	0.500529	0.535786	0.56703	0.636368	0.620617	0.676703	0.758025	0.575443	0.434577	0.523119	0.678702	0.595689	0.537485	0.661872	0.454007	0.595777	0.525731	0.511645	0.517801	0.600575
9.0015	0.460731	0.574701	0.574701	0.535728	0.560345	0.609552	0.620784	0.725746	0.811988	0.618283	0.440688	0.505204	0.66756	0.51347	0.543711	0.68004	0.485983	0.563047	0.492251	0.555303	0.473664	0.647019
9.2018	0.441873	0.546691	0.546691	0.563802	0.569084	0.649648	0.593919	0.738808	0.829734	0.588403	0.419784	0.537647	0.681947	0.570631	0.581855	0.657821	0.489592	0.638697	0.511542	0.531213	0.562517	0.640886
9.401	0.484882	0.601928	0.601928	0.559331	0.598079	0.643385	0.60584	0.755607	0.722191	0.589369	0.450738	0.507817	0.715602	0.592208	0.489234	0.624412	0.486767	0.607656	0.487597	0.569299	0.55445	0.654755
9.6018	0.451518	0.58299	0.58299	0.544052	0.553184	0.615867	0.652973	0.732052	0.762007	0.619223	0.441655	0.572439	0.656039	0.571226	0.57003	0.654767	0.56529	0.646186	0.504871	0.550171	0.509011	0.662736
9.8011	0.423415	0.557201	0.557201	0.528353	0.581468	0.656366	0.632068	0.754762	0.771693	0.582005	0.445751	0.570578	0.558089	0.547816	0.507866	0.633298	0.537377	0.648688	0.475231	0.569374	0.520603	0.695024
10.0019	0.443868	0.598532	0.598532	0.489818	0.557556	0.614563	0.608674	0.75918	0.737799	0.591187	0.446554	0.58684	0.599725	0.541761	0.571712	0.699992	0.494905	0.659288	0.555089	0.583367	0.605663	0.733176
10.2011	0.445036	0.579253	0.579253	0.533377	0.560772	0.65536	0.599998	0.69928	0.772413	0.614935	0.431268	0.613787	0.615889	0.561379	0.563973	0.634309	0.450452	0.655926	0.519623	0.574196	0.536294	0.701749
10.4013	0.465115	0.642436	0.642436	0.54624	0.583064	0.608061	0.721508	0.701288	0.745916	0.638688	0.485274	0.600816	0.663615	0.561303	0.582596	0.67329	0.496835	0.717852	0.520873	0.594632	0.57311	0.747788
10.6012	0.431345	0.591426	0.591426	0.562206	0.572921	0.677131	0.662496	0.68387	0.74584	0.649359	0.44406	0.626241	0.722096	0.566275	0.591231	0.688291	0.526223	0.734123	0.542706	0.612425	0.549134	0.663159
10.8014	0.425866	0.575607	0.575607	0.549049	0.57012	0.685446	0.743593	0.692227	0.725918	0.633363	0.446627	0.555112	0.689187	0.638209	0.519273	0.693767	0.557514	0.74709	0.514995	0.565518	0.559478	0.793087
11.0012	0.453387	0.56518	0.56518	0.557378	0.574255	0.648429	0.766821	0.75464	0.743459	0.660527	0.440194	0.579887	0.695811	0.581532	0.54183	0.75218	0.51007	0.725404	0.554977	0.599538	0.582357	0.734906
11.2015	0.461341	0.547492	0.547492	0.513746	0.555856	0.653509	0.641428	0.712493	0.755073	0.681276	0.462044	0.587523	0.568023	0.611051	0.529286	0.710037	0.586457	0.72525	0.572659	0.563368	0.551452	0.733069
11.4013	0.502006	0.599714	0.599714	0.573867	0.571294	0.660606	0.681251	0.703228	0.739131	0.636728	0.478218	0.581625	0.658556	0.585887	0.564643	0.684363	0.513303	0.735036	0.536127	0.571329	0.574748	0.73205
11.6015	0.474574	0.592309	0.592309	0.529076	0.579523	0.634647	0.658042	0.695711	0.724161	0.666959	0.459952	0.553187	0.672591	0.595159	0.606458	0.588737	0.5353	0.708026	0.538715	0.567637	0.627369	0.754148
11.8014	0.466668	0.591837	0.591837	0.54048	0.568256	0.630264	0.651973	0.777032	0.722449	0.679042	0.448312	0.565263	0.616237	0.552163	0.543008	0.793788	0.538671	0.693738	0.558306	0.573851	0.598016	0.66809
12.0016	0.483461	0.617131	0.617131	0.513963	0.587502	0.670809	0.691839	0.78465	0.777033	0.690872	0.49078	0.624311	0.674992	0.628808	0.585159	0.724898	0.66511	0.697937	0.567467	0.644307	0.574476	0.740071
12.2014	0.479813	0.597741	0.597741	0.526229	0.638876	0.632391	0.637995	0.743185	0.750763	0.645733	0.513471	0.621827	0.704772	0.614028	0.503731	0.725152	0.565316	0.675343	0.611335	0.589782	0.588567	0.733499
12.4016	0.453583	0.581382	0.581382	0.525091	0.590816	0.651412	0.629848	0.754734	0.738346	0.677187	0.506027	0.577863	0.675549	0.618686	0.637241	0.668018	0.588774	0.773204	0.608704	0.582763	0.571542	0.696493
12.6015	0.470071	0.547981	0.547981	0.515741	0.568119	0.669944	0.633892	0.744111	0.704626	0.660541	0.473888	0.602144	0.755126	0.655411	0.62247	0.698776	0.588436	0.772616	0.612049	0.581439	0.628897	0.731814
12.8017	0.50446	0.5583	0.5583	0.506357	0.614523	0.671678	0.6647	0.747246	0.766719	0.66826	0.510266	0.65675	0.652599	0.664275	0.588898	0.62893	0.61657	0.811934	0.545948	0.616615	0.57339	0.653966
13.0015	0.462077	0.581516	0.581516	0.510178	0.617223	0.729158	0.616519	0.796716	0.733891	0.671145	0.493823	0.665605	0.687607	0.643015	0.639029	0.593321	0.575251	0.778378	0.539044	0.604217	0.598228	0.717173
13.2013	0.537188	0.553589	0.553589	0.514652	0.634326	0.729285	0.687484	0.804277	0.731967	0.724683	0.487897	0.603585	0.664158	0.680079	0.572282	0.574769	0.562623	0.832617	0.556834	0.617853	0.590536	0.780112
13.4015	0.540692	0.592756	0.592756	0.523411	0.596905	0.698432	0.690543	0.794134	0.730461	0.660839	0.507263	0.60197	0.692765	0.700505	0.687064	0.685683	0.529534	0.732991	0.544016	0.614772	0.555451	0.749296
13.6014	0.550402	0.588164	0.588164	0.544247	0.605528	0.702228	0.64305	0.774178	0.767949	0.699586	0.513538	0.671473	0.751686	0.645155	0.636271	0.648222	0.512663	0.795525	0.524611	0.596798	0.566341	0.751807
13.8012	0.533802	0.622201	0.622201	0.573378	0.583433	0.76625	0.658441	0.805558	0.726646	0.74243	0.5215	0.655606	0.739177	0.631651	0.68845	0.65994	0.556384	0.779404	0.546471	0.597059	0.599372	0.753725
14.0014	0.502846	0.630119	0.630119	0.571625	0.624628	0.709206	0.685458	0.746643	0.803311	0.708581	0.514302	0.617607	0.797371	0.685566	0.691607	0.589251	0.518149	0.791546	0.617321	0.582822	0.575354	0.79543
14.2013	0.542579	0.612519	0.612519	0.534439	0.598818	0.728471	0.691819	0.760162	0.734523	0.69599	0.515364	0.668558	0.733136	0.663459	0.684519	0.681201	0.558556	0.730181	0.540219	0.621654	0.561999	0.739654
14.4015	0.537114	0.63296	0.63296	0.584003		0.739868	0.727772	0.817061	0.794547	0.777013	0.539677	0.691307	0.736317	0.703817	0.666679	0.661248	0.525421	0.743619	0.591283	0.62389	0.559507	0.79123
14.6013	0.515447	0.655012	0.655012	0.581912		0.734849	0.670582	0.797514	0.763989	0.780531	0.512559	0.667723	0.655501	0.671786	0.655046	0.689738	0.551046	0.728512	0.576092	0.618777	0.622636	0.748079
14.8015	0.568871	0.646212	0.646212	0.556354		0.742681	0.687519	0.759452	0.801647	0.754058	0.54412	0.614112	0.726084	0.625755	0.711002	0.659159	0.595622	0.725967	0.570373	0.622355	0.588892	0.761495
15.0011	0.525182	0.614233	0.614233	0.612773		0.726822	0.678522	0.84942	0.824011	0.774309	0.546054	0.630009	0.776148	0.672799	0.706129	0.705917	0.569002	0.781244	0.544363	0.655291	0.589434	0.772588
15.2016	0.537948	0.624054	0.624054	0.598488		0.749112	0.695932	0.778614	0.808365	0.811285	0.529697	0.723573	0.664753	0.728484	0.690067	0.686374	0.523396	0.774505	0.589712	0.616156	0.583584	0.776937
15.4012	0.555986	0.707969	0.707969	0.583479		0.769601	0.68645	0.766799	0.750054	0.877239	0.553104	0.685953	0.697633	0.647528	0.723559	0.646251	0.523546	0.8142	0.602947	0.618411	0.59203	0.758873
15.6016	0.550729	0.647605	0.647605	0.594104		0.69999	0.713922	0.841165	0.777858	0.805559	0.546122	0.7342	0.653671	0.671407	0.669113	0.682092	0.481316	0.791365	0.590731	0.622438	0.562251	0.731168
15.8012	0.526112	0.662959	0.662959	0.627211		0.719307	0.780545	0.868122	0.788909	0.828919	0.515196	0.688926	0.715735	0.648443	0.660345	0.732197	0.518149	0.809175	0.560599	0.613748	0.542937	0.784183
16.0017	0.55183	0.647544	0.647544	0.635944		0.742251	0.738448	0.843398	0.803383	0.81447	0.559993	0.72134	0.767777	0.689716	0.742112	0.730104	0.520064	0.77381	0.5596	0.57547	0.56819	0.771736
16.2013	0.548566	0.645353	0.645353	0.662002		0.71674	0.719354	0.83922	0.840018	0.78349	0.56938	0.644419	0.780259	0.697065	0.794391	0.719676	0.567743	0.821605	0.57317	0.630196	0.573859	0.789438
16.4017	0.538235	0.617615	0.617615	0.619193		0.668175	0.659471	0.808663	0.816275	0.760469	0.542581	0.587802	0.816814	0.68183	0.780308	0.738374	0.566506	0.805791	0.547284	0.60405	0.529507	0.840075
16.6014	0.511903	0.621455	0.621455	0.60862		0.684664	0.651121	0.848479	0.785635	0.761959	0.561708	0.725569	0.724509	0.717212	0.7226	0.65433	0.571828	0.827444	0.557196	0.622472	0.575008	0.83722
16.8018	0.532532	0.664094	0.664094	0.634713		0.722293	0.663561	0.775241	0.826186	0.733199	0.539946	0.685412	0.772061	0.691196	0.764014	0.706626	0.571495	0.77396	0.623069	0.58338	0.573552	0.809012
17.0014	0.52639	0.665587	0.665587	0.669844		0.721609	0.630968	0.83861	0.802886	0.738884	0.563072	0.733474	0.756696	0.632791	0.705291	0.736714	0.62823	0.757709	0.554278	0.671225	0.61437	0.744053
17.2019	0.57199	0.652396	0.652396	0.665619		0.660646	0.683246	0.828221	0.794006	0.766471	0.575264	0.631024	0.799579	0.632606	0.709971	0.747011	0.538426	0.737945	0.569895	0.653743	0.602337	0.789369
17.4015	0.510441	0.64865	0.64865	0.665186		0.562827	0.680594	0.858221	0.785661	0.774518	0.522329	0.677739	0.800759	0.634431	0.631813	0.810532	0.63323	0.739503	0.600647	0.668903	0.696065	0.769718
17.6013	0.502589	0.639224	0.639224	0.639562		0.6818	0.617633	0.862807	0.795692	0.745213	0.594752	0.730158	0.858989	0.684848	0.72093	0.78817	0.56515	0.718093	0.609902	0.657472	0.660924	0.734384
17.8015	0.534499	0.60863	0.60863	0.670545		0.66946	0.650368	0.870123	0.812813	0.748567	0.58424	0.746649	0.839756	0.673539	0.763154	0.833262	0.632397	0.771054	0.540728	0.62576	0.734465	0.716751
18.0014	0.559824	0.6346	0.6346	0.652983		0.676301	0.664731	0.904691	0.772647	0.806894	0.559218	0.668037	0.87599	0.6857	0.710029	0.790145	0.56823	0.780637	0.608678	0.638892	0.657869	0.797474
18.2016	0.564966	0.663626	0.663626	0.658323		0.698362	0.664118	0.86479	0.80424	0.751616	0.594262	0.65609	0.860894	0.635788	0.699503	0.774671	0.586979	0.792784	0.631341	0.628266	0.671978	0.798731
18.4014	0.516197	0.579613	0.579613	0.621636		0.650142	0.695373	0.821323	0.829696	0.796056	0.602776	0.647991	0.82656	0.641987	0.723394	0.815787	0.624911	0.809718	0.638596	0.640348	0.634933	0.84953
18.601	0.56625	0.630647	0.630647	0.59098		0.681246	0.741639	0.861726	0.855033	0.762203	0.588932	0.723488	0.765335	0.673915	0.713746	0.713131	0.668568	0.802954	0.580074	0.667928	0.603733	0.808157
18.8015	0.559514	0.627095	0.627095	0.641884		0.665682	0.709594	0.83588	0.807168	0.760488	0.567605	0.694086	0.795459	0.68745	0.719632	0.719693	0.627069	0.725455	0.624251	0.657763	0.606449	0.872619
19.0011	0.576476	0.664964	0.664964	0.647271		0.726584	0.619479	0.871239	0.8359	0.749623	0.59305	0.652632	0.857681	0.663852	0.7222	0.695242	0.611171	0.768272	0.627277	0.683991	0.599268	0.792231
19.2015	0.549082	0.620547	0.620547	0.609975		0.651606	0.623167	0.798894	0.818564	0.8368	0.579827	0.695987	0.855313	0.667474	0.664569	0.741842	0.631928	0.754203	0.586595	0.709318	0.55243	0.764994
19.4012	0.544073	0.612755	0.612755	0.59459		0.715583	0.641179	0.843126	0.843003	0.79838	0.596364	0.657076	0.871522	0.686165	0.688007	0.738299	0.576334	0.769153	0.593001	0.69537	0.624678	0.761567
19.6016	0.55656	0.653423	0.653423	0.601179		0.689123	0.623986	0.822907	0.815696	0.789224	0.612601	0.711096	0.822834	0.6888	0.692235	0.843586	0.607232	0.737175	0.638194	0.705027	0.620932	0.821444
19.8012	0.566045	0.656642	0.656642	0.572001		0.673291	0.677697	0.838366	0.820852	0.796266	0.593493	0.656267	0.811307	0.675702	0.717002	0.794349	0.631519	0.716271	0.627028	0.666883	0.624633	0.78545
20.0017	0.606479	0.58445	0.58445	0.575937		0.642764	0.673275	0.896318	0.765631	0.805199	0.605817	0.687722	0.874106	0.691185	0.6691	0.847441	0.593307	0.771691	0.659737	0.703153	0.603238	0.774276
20.2013	0.574376	0.650322	0.650322	0.564579		0.681549	0.683871	0.944953	0.773354	0.792492	0.584141	0.698168	0.798519	0.668152	0.795119	0.756554	0.565882	0.721185	0.649583	0.704518	0.607149	0.797852
20.4017	0.60563	0.644748	0.644748	0.52861		0.669854	0.636224	0.902228	0.805425	0.785328	0.613473	0.635229	0.842382	0.702802	0.603746	0.808563	0.5915	0.675831	0.588363	0.641414	0.65131	0.843974
20.6013	0.570951	0.662426	0.662426	0.552367		0.691592	0.670505	0.930951	0.758619	0.835926	0.632796	0.719828	0.855566	0.662235	0.726036	0.644649	0.589137	0.709371	0.591495	0.705369	0.62139	0.780575
20.8018	0.586953	0.661532	0.661532	0.593719		0.687223	0.665414	0.975485	0.789026	0.820686	0.612816	0.611341	0.758456	0.742744	0.743445	0.823228	0.62977	0.708203	0.588534	0.696024	0.569014	0.806278
21.0014	0.557425	0.633061	0.633061	0.574518		0.672259	0.732031	0.949739	0.792034	0.85194	0.630002	0.72951	0.82801	0.724665	0.655008	0.758516	0.553695	0.707194	0.59511	0.639987	0.57256	0.839276
21.2018	0.60659	0.623857	0.623857	0.550291		0.701362	0.651867	0.926293	0.751676	0.874422	0.561962	0.740948	0.821191	0.708374	0.764169	0.787219	0.623731	0.756198	0.565583	0.712528	0.563638	0.856123
21.4015	0.604671	0.651423	0.651423	0.523589		0.689125	0.607499	0.919092	0.782069	0.832104	0.570985	0.700136	0.774065	0.760456	0.670492	0.819608	0.676927	0.732644	0.59001	0.697029	0.568461	0.859143
21.6013	0.585896	0.63401	0.63401	0.652209		0.717481	0.672577	0.887873	0.818815	0.821461	0.58106	0.701563	0.843182	0.725433	0.780322	0.802965	0.649119	0.741961	0.590865	0.656819	0.488948	0.806928
21.8015	0.580542	0.671479	0.671479	0.568684		0.724385	0.602102	0.922641	0.774846	0.861986	0.609253	0.699588	0.725451	0.685405	0.733007	0.732193	0.617236	0.719412	0.567669	0.687958	0.546287	0.862824
22.0014	0.58741	0.69171	0.69171	0.607875		0.698036	0.610029	0.953492	0.757749	0.838756	0.621205	0.712655	0.82867	0.716859	0.656213	0.835041	0.655973	0.697298	0.569148	0.729238	0.513806	0.815854
22.2016	0.584514	0.720445	0.720445	0.564318		0.749774	0.635892	0.920105	0.814692	0.811051	0.616522	0.756793	0.879513	0.674987	0.78223	0.746056	0.64038	0.764222	0.568626	0.674826	0.580474	0.809245
22.4014	0.561972	0.693379	0.693379	0.568628		0.766408	0.644479	0.942874	0.814588	0.761576	0.606596	0.686142	0.819746	0.673692	0.762024	0.801645	0.658735	0.762911	0.598153	0.739011	0.563785	0.878711
22.6011	0.58783	0.699767	0.699767	0.601211		0.721557	0.670574	0.930927	0.777995	0.781357	0.61952	0.67097	0.80379	0.707404	0.734759	0.766363	0.662338	0.794801	0.544263	0.687356	0.551966	0.841016
22.8015	0.550286	0.655029	0.655029	0.578689		0.733037	0.584898	0.964297	0.808745	0.769053	0.66497	0.744207	0.808885	0.620391	0.758367	0.832209	0.665505	0.741486	0.643856	0.69242	0.5331	0.890911
23.0011	0.581123	0.642232	0.642232	0.527464		0.720517	0.581952	0.944037	0.796045	0.732547	0.630821	0.756261	0.845533	0.666961	0.667163	0.758188	0.647316	0.74049	0.619844	0.718271	0.507371	0.894707
23.2015	0.571904	0.651703	0.651703	0.573416		0.68593	0.6167	0.924654	0.818168	0.719993	0.615164	0.647464	0.763347	0.628461	0.796208	0.81494	0.624029	0.799613	0.669514	0.693829	0.536508	0.887576
23.4012	0.620215	0.663076	0.663076	0.55993		0.70894	0.632389	0.963487	0.852154	0.751014	0.653821	0.647199	0.808877	0.684662	0.651288	0.833893	0.682249	0.707747	0.624757	0.68002	0.55793	0.872325
23.6016	0.630318	0.707483	0.707483	0.551501		0.695979	0.656885	0.929256	0.854502	0.730149	0.618817	0.684068	0.887395	0.676317	0.719017	0.807583	0.597807	0.720598	0.672759	0.669609	0.586861	0.889097
23.8012	0.644438	0.667567	0.667567	0.590114		0.710199	0.645769	0.931182	0.840494	0.795207	0.632849	0.751369	0.921306	0.57485	0.700362	0.865403	0.633382	0.740569	0.683064	0.737528	0.655223	0.881282
24.0017	0.575064	0.698823	0.698823	0.5984		0.758326	0.62907	0.929446	0.853312	0.762173	0.629978	0.750697	0.879961	0.635797	0.733307	0.817413	0.662157	0.75738	0.689441	0.670995	0.601757	0.877922
24.2013	0.6167	0.683616	0.683616	0.598524		0.741953	0.633623	0.88612	0.855046	0.808787	0.599877	0.723473	0.839741	0.644539	0.659618	0.791023	0.630922	0.80488	0.664424	0.687613	0.635501	0.820202
24.4017	0.599995	0.696067	0.696067	0.648467		0.773141	0.667746	0.984633	0.896903	0.796368	0.605766	0.863514	0.780559	0.655318	0.712821	0.833333	0.666792	0.749324	0.684896	0.678349	0.568086	0.785241
24.6014	0.592626	0.655282	0.655282	0.613007		0.763601	0.645972	0.92264	0.880921	0.843013	0.624999	0.742676	0.816594	0.667179	0.669688	0.761412	0.605458	0.79524	0.673074	0.667983	0.593671	0.838607
24.8018	0.612017	0.668982	0.668982	0.634016		0.780811	0.69477	0.915872	0.854687	0.874779	0.610329	0.734526	0.80813	0.663573	0.711123	0.763269	0.523306	0.738611	0.674983	0.720113	0.586364	0.829138
25.0014	0.628318	0.66326	0.66326	0.684872		0.754697	0.676873	0.946086	0.850912	0.896226	0.616666	0.751459	0.799609	0.661733	0.695471	0.769032	0.603453	0.714983	0.664059	0.685489	0.545262	0.793741
25.2018	0.643133	0.695629	0.695629	0.667594		0.77788	0.75576	0.89674	0.873282	0.887903	0.657729	0.813785	0.892078	0.615773	0.728791	0.744449	0.573965	0.700863	0.654073	0.658896	0.574461	0.838726
25.4015	0.574745	0.656423	0.656423	0.653023		0.74279	0.791794	0.917447	0.95121	0.851947	0.633473	0.778267	0.814835	0.655053	0.729411	0.758811		0.728408	0.633887	0.657398	0.563468	0.841307
25.6013	0.556265	0.656042	0.656042	0.609496		0.713864	0.845224	0.96346	0.924842	0.876251	0.636565	0.822669	0.885977	0.588318	0.662134	0.728124		0.699261	0.671187	0.663283	0.557155	0.797481
25.8015	0.586237	0.669362	0.669362	0.644132		0.788462	0.72566	0.890368	0.884471	0.880064	0.610897	0.776352	0.793237	0.606406	0.57541	0.795475		0.677696	0.61869	0.645823	0.612781	0.810962
26.0014	0.584013	0.663679	0.663679	0.625696		0.78373	0.732249	0.949321	0.928679	0.835924	0.623334	0.742618	0.884039	0.585748	0.699747	0.734953		0.692704	0.692316	0.673293	0.625008	0.890748
26.201	0.605479	0.692069	0.692069	0.611355		0.783507	0.660206	0.903141	0.877573	0.84267	0.659135	0.732227	0.828021	0.584644	0.71452	0.731015		0.738484	0.653793	0.670251	0.629078	0.729096
26.4014	0.551791	0.712629	0.712629	0.595247		0.79722	0.69674	0.867988	0.881695	0.82648	0.61896	0.691704	0.800003	0.628201	0.752166	0.787346		0.745196	0.658619	0.686914	0.632456	0.854902
26.6011	0.544029	0.687016	0.687016	0.566033		0.729648	0.726384	0.883148	0.890713	0.862796	0.631722	0.74317	0.828961	0.672621	0.659679	0.803283		0.711307	0.679143	0.692616	0.655765	0.877336
26.8015	0.536665	0.685159	0.685159	0.551471		0.772016	0.672585	0.907406	0.951452	0.918175	0.722497	0.730985	0.828362	0.649039	0.622936	0.761917		0.75272	0.697091	0.626322	0.671817	0.790216
27.0011	0.582568	0.659658	0.659658	0.599918		0.81353	0.75353	0.956572	0.810349	0.917502	0.688856	0.74297	0.844861	0.68861	0.756583	0.744086		0.759889	0.677774	0.659758	0.605778	0.796626
27.2016	0.533559	0.668277	0.668277	0.572488		0.789499	0.655246	0.950729	0.843963	0.928267	0.642757	0.804414	0.869797	0.680689	0.690056	0.830705		0.727781	0.661822	0.674915	0.596291	0.835357
27.4012	0.56851	0.652264	0.652264	0.620117		0.7751	0.704609	1.0264	0.87971	0.903705	0.654319	0.762521	0.773215	0.684316	0.716613	0.752738		0.744773	0.66535	0.676972	0.557625	0.852734
27.6016	0.565804	0.677645	0.677645	0.608863		0.76736	0.689894	0.929798	0.835991	0.935438	0.661036	0.807551	0.824968	0.684357	0.704883	0.724014		0.768318	0.672855	0.658827	0.590607	0.831451
27.8012	0.541684	0.682598	0.682598	0.576407		0.795173	0.788268	0.936563	0.958805	0.861149	0.656965	0.83393	0.774976	0.707784	0.722319	0.804271		0.713256	0.684459	0.683417	0.63419	0.820594
28.0017	0.594113	0.65995	0.65995	0.628369		0.81332	0.772088	0.904734	0.880412	0.878759	0.636708	0.802763	0.784298	0.686386	0.683543	0.771143		0.800607	0.697605	0.637724	0.557095	0.85153
28.2013	0.553471	0.656852	0.656852	0.617418		0.799676	0.749911	0.925375	0.845789	0.868892	0.618885	0.798543	0.834121	0.710438	0.69322	0.708659		0.772233	0.674764	0.658194	0.609826	0.891772
28.4017	0.567947	0.725175	0.725175	0.616123		0.814292	0.764922	0.965496	0.860698	0.845066	0.694825	0.783035	0.81823	0.661029	0.690796	0.721107		0.751758	0.649018	0.645544	0.571073	0.890749
28.6014	0.588795	0.724706	0.724706	0.603455		0.804425	0.756824	0.976687	0.805422	0.826845	0.666813	0.822183	0.802966	0.673926	0.688733	0.750446		0.70272	0.644637	0.659512	0.566855	0.909823
28.8018	0.601202	0.711566	0.711566	0.586006		0.812075	0.739759	0.987714	0.875954	0.86453	0.618866	0.813365	0.861543	0.6772	0.612707	0.712817		0.704481	0.707826	0.655283	0.592762	0.868655
29.0014	0.570009	0.695748	0.695748	0.531447		0.812837	0.743593	1.04663	0.882012	0.884013	0.661541	0.763813	0.868232	0.768829	0.643631	0.695602		0.73996	0.694747	0.660346	0.610855	0.883254
29.2019	0.598091	0.661675	0.661675	0.526871		0.792462	0.704459	0.989394	0.855217	0.877749	0.672456	0.782572	0.847261	0.687491	0.596244	0.78408		0.74275	0.71872	0.639272	0.622228	0.805007
29.4015	0.659106	0.678278	0.678278	0.495223		0.796994	0.764798	0.988977	0.871637	0.857296	0.694284	0.745296	0.805228	0.728738	0.676997	0.777638		0.757625	0.674052	0.662531	0.684721	0.884559
29.6013	0.640517	0.664754	0.664754	0.504591		0.818096	0.715574	1.00421	0.843565	0.851193	0.709171	0.726475	0.786667	0.708443	0.733162	0.805886		0.778612	0.71953	0.70513	0.659563	0.868035
29.8015	0.621038	0.653995	0.653995	0.505439		0.833702	0.831944	0.996189	0.889501	0.831682	0.713577	0.810473	0.78943	0.686861	0.72289	0.857112		0.747692	0.697716	0.703323	0.622627	0.813371
30.0014	0.634381	0.720734	0.720734	0.541306		0.81694	0.809125	1.02619	0.837465	0.789566	0.675352	0.83243	0.796751	0.690593	0.702226	0.872411		0.780623	0.683103	0.626947	0.582326	0.770491
30.201	0.63464	0.655627	0.655627	0.559024		0.812218	0.789582	1.08288	0.822029	0.814876	0.669277	0.768529	0.882992	0.691224	0.73998	0.826182		0.774765	0.68955	0.653249	0.573189	0.76307
30.4015	0.65583	0.68782	0.68782	0.550034		0.833848	0.791634	1.06366	0.838968	0.88642	0.69517	0.718476	0.849203	0.727299	0.754749	0.761303		0.784213	0.693369	0.713964	0.554028	0.866367
30.6011	0.564369	0.63857	0.63857	0.559111		0.797697	0.782524	0.982502	0.843347	0.859608	0.638116	0.71941	0.840474	0.706834	0.637154	0.828433		0.813661	0.664184	0.677286	0.589751	0.813019
30.8015	0.567965	0.633165	0.633165	0.590504		0.797003	0.868493	0.995078	0.823492	0.881828	0.677889	0.755948	0.804042	0.769995	0.740678	0.769828		0.832652	0.712062	0.689824	0.57801	0.856285
31.0011	0.613616	0.713883	0.713883	0.556931		0.78979	0.77274	1.04218	0.858552	0.800343	0.694669	0.799245	0.780615	0.716989	0.690803	0.831201		0.847518	0.691777	0.669457	0.568844	0.784006
31.2015	0.608986	0.664661	0.664661	0.529678		0.77055	0.712825	1.03938	0.860354	0.820032	0.682576	0.711655	0.809345	0.675074	0.754338			0.872978	0.706927	0.671575	0.627166	0.782803
31.4012	0.654212	0.701853	0.701853	0.55142		0.770113	0.702388	1.01418	0.811328	0.869749	0.649256	0.786179	0.822195	0.649733	0.786152			0.881007	0.766888	0.661254	0.623756	0.891681
31.6016	0.60179	0.684837	0.684837	0.554575		0.713658	0.771107	1.04584	0.824823	0.86118	0.680564	0.72333	0.842814	0.715642	0.761649			0.826129	0.729163	0.674427	0.573901	0.905177
31.8012	0.596601	0.649237	0.649237	0.557713		0.732381	0.780834	0.981172	0.800753	0.947313	0.712812	0.852304	0.851151	0.705585	0.778356			0.894069	0.695347	0.65768	0.54982	0.817121
32.0017	0.586124	0.716721	0.716721	0.544277		0.795656	0.776249	1.02212	0.762246	0.847458	0.672626	0.850191	0.827322	0.651455	0.780014			0.836152	0.699969	0.661611	0.60731	0.836886
32.2013	0.566532	0.654866	0.654866	0.532913		0.852954	0.787629	1.00298	0.787186	0.837637	0.663594	0.812384	0.863239	0.702729	0.702096			0.856065	0.679404	0.666052	0.593432	0.87135
32.4017	0.541212	0.665892	0.665892	0.579515		0.782106	0.815456	1.02316	0.849862	0.880468	0.677083	0.814926	0.875478	0.64927	0.747314			0.854553	0.63815	0.637436	0.56608	0.836614
32.6013	0.484823	0.709558	0.709558	0.587518		0.718597	0.775709	1.08303	0.861864	0.831174	0.701118	0.892931	0.898212	0.682106	0.800764			0.808381	0.637994	0.67259	0.599446	0.84872
32.8018	0.531744	0.678477	0.678477	0.551387		0.756051	0.699642	0.994948	0.792634	0.895168	0.716386	0.791115	0.845382		0.714476			0.78557	0.661899	0.672312	0.521814	0.791479
33.0014	0.518322	0.659302	0.659302	0.553516		0.776749	0.714196	1.05412	0.823717	0.891733	0.737993	0.813306	0.876022		0.705587			0.79856	0.6565	0.652292	0.602039	0.834661
33.2018	0.551783	0.729554	0.729554	0.547837		0.782751	0.650733	1.06248	0.805788	0.831806	0.698977	0.850711	0.868723		0.764369			0.799076	0.638548	0.625027	0.615984	0.817623
33.4015	0.592211	0.753687	0.753687	0.551746		0.768747	0.671488	0.995394	0.815025	0.916257	0.734504	0.864771	0.863353		0.803862			0.782431	0.649572	0.680652	0.672248	0.837416
33.6013	0.599797	0.741145	0.741145	0.544552		0.77516	0.715265	1.0403	0.846769	0.878866	0.756825	0.869647	0.883454		0.762015			0.79068	0.635609	0.676331	0.660367	0.847961
33.8015	0.619782	0.727823	0.727823	0.559218		0.750231	0.75882	1.04578	0.883386	0.866638	0.662881	0.842562	0.89068		0.845763			0.783165	0.689217	0.680806	0.602552	0.819159
34.0014	0.614537	0.700905	0.700905	0.542951		0.74843	0.702193	1.02824	0.858511	0.854824	0.679593	0.844856	0.872871		0.78921			0.810237	0.691218	0.721079	0.629128	0.819425
34.2016	0.642207	0.727476	0.727476	0.515839		0.77336	0.698014	1.09793	0.855105	0.913726	0.676563	0.869416	0.901319		0.776587			0.780879	0.646858	0.687936	0.619493	0.850204
34.4014	0.61689	0.742473	0.742473	0.545239		0.760462	0.661859	1.04706	0.871234	0.880413	0.725069	0.722106	0.947454		0.813204			0.83114	0.67281	0.678372	0.640263	0.814911
34.6011	0.539428	0.67728	0.67728	0.561742		0.752737	0.676078	1.09728	0.890356	0.863776	0.703254	0.832573	0.897938		0.773274			0.790199	0.716891	0.686695	0.649515	0.877127
34.8015	0.571287	0.717749	0.717749	0.504482		0.791519	0.690718	1.077	0.859269	0.91014	0.642497	0.831914	0.929309		0.719274			0.824666	0.69482	0.675595	0.649447	0.82791
35.0011	0.541278	0.726613	0.726613	0.565246		0.764987	0.714302	1.06444		0.893269	0.652849	0.776066	0.957522		0.801759			0.83193	0.730493	0.644496	0.612319	0.889171
35.2015	0.572667	0.74147	0.74147	0.518533		0.826745	0.768076	1.12031		0.910479	0.696693	0.866552	0.967909		0.826702			0.890905	0.691315	0.675327	0.625221	0.830361
35.4011	0.593911	0.751697	0.751697	0.576832		0.829473	0.742079	1.05581		0.900399	0.684559	0.842419	0.882904		0.752813			0.819976	0.691379	0.714782	0.671827	0.817543
35.6016	0.638821	0.739649	0.739649	0.573724		0.804505	0.776399	1.06865		0.951687	0.669785	0.85598	0.960225		0.809054			0.893627	0.686645	0.720479	0.692364	0.900798
35.8012	0.58105	0.750784	0.750784	0.525133		0.806807	0.745511	1.09902		0.907817	0.716942	0.863642	0.971238		0.793628			0.898281	0.671932	0.621702	0.624071	0.892818
36.0016	0.628412	0.759601	0.759601	0.554345		0.787445	0.78716	1.1043		0.926769	0.672212	0.903239	0.914263		0.776017			0.868953	0.70986	0.647495	0.659788	0.854207
36.2013	0.627049	0.771004	0.771004	0.519827		0.779537	0.822979	1.05005		0.92234	0.713398	0.931121	0.889651		0.765858			0.90871	0.591058	0.632312	0.677875	0.876723
36.4017	0.653478	0.762748	0.762748	0.554921		0.813408	0.815058	1.03795		0.852798	0.67314	0.842635	0.890877		0.81118			0.98028	0.714166	0.63232	0.667823	0.820219
36.6013	0.574285	0.791082	0.791082	0.53789		0.808972	0.799327	1.08433		0.794637	0.672376	0.847311	0.900657		0.764511			0.848264	0.683895	0.683439	0.673207	0.802114
36.8018	0.595808	0.758535	0.758535	0.578059		0.821921	0.797492	1.06275		0.832929	0.689411	0.84888	0.957255		0.704951			0.767631	0.679074	0.649515	0.674566	0.783307
37.0014	0.606041	0.753586	0.753586	0.583487		0.805605	0.782282	1.10112		0.772409	0.700353	0.764929	0.860559		0.761629			0.771646	0.658276	0.621125	0.64501	0.795218
37.2018	0.598219	0.706298	0.706298	0.582837		0.741815	0.770321	1.10499		0.754466	0.767417	0.816297	0.908434		0.81989			0.860162	0.677832	0.665616	0.659596	0.773774
37.4014	0.588836	0.730349	0.730349	0.580017		0.765457	0.739563	1.0928		0.833712	0.715376	0.828125	0.939895		0.798895			0.747216	0.65574	0.652131	0.69021	0.801502
37.6019	0.591289	0.749477	0.749477	0.568212		0.79764	0.781415	1.03537		0.810844	0.73179	0.887716	0.926219		0.735249			0.814651	0.673452	0.672662	0.616873	0.73206
37.8015	0.623553	0.768268	0.768268	0.570835		0.81508	0.729553	1.01259		0.854945	0.674242	0.87683	0.910151		0.76575			0.855107	0.678475	0.678693	0.602672	0.770341
