# Supplementary material for: Branched ubiquitin chain binding and deubiquitination by UCH37 facilitate proteasome clearance of stress-induced inclusions
Source: eLife. 2021 Nov 11;10:e72798. doi: 10.7554/eLife.72798 (PMC8635973; doi:10.7554/eLife.72798)
Supplement: Figure 6—source data 3. [file elife-72798-fig6-data3.xlsx]

## Sheet: Analysis summary
Quantitative proteomics analyses of UCH37-associated proteasomes by TMT.
Proteasomes were immunoprecipitated from UCH37KO, GFP-UCH37(WT), GFP-UCH37 (C88S), GFP-UCH37(EWI) stable cell lines and analyzed as described in Materials and Methods.
Thermo Scientific Proteome Discoverer 2.3 with SEQUEST was used for protein identification against a database containing all SwissProt entries for Homo Sapiens (February, 2020).
Searches were performed using a 10 ppm precursor ion tolerance, the product ion tolerance was set to 0.1 Da. TMT tags on lysine residues and peptide N termini (+229.163 Da) and carboxyamidomethylation of cysteine residues (+57.021 Da) were set as static modifications, while oxidation of methionine residues (+15.995 Da) was set as a variable modification.
Peptide-spectrum matches (PSMs) and protein false discovery rates (FDRs) were set as 1%.
"Identified proteins" table contains the raw data of all proteins quantified from two biological replicates, each analyzed by mass spectrometry in triplicate.
Grouped abundance of each identified protein was first normalized against those in the WT sample to obtain the Abundance Ratio.
"Proteasome Subunits" table contains only proteasome subunits. Average abundance of the 19S subunits was calculated and used as a measure of the amount of proteasomes in each sample, which is used to compare each identified protein on a per-proteasome basis.
"PIPs" table contains previously known proteasome interacting proteins.

## Sheet: Proteasome Subunits
						Abundance Ratio
						WT/WT	C88S/WT	EWI/WT
					Average 19S	1	1.23979	0.994263
						normalized by 19S				Grouped Abundances CV
Protein Name	Accession	Gene Name	Description		Categorization	WT	C88S	EWI		WT	C88S	EWI
Rpn2/S1	Q99460	PSMD1	26S proteasome non-ATPase regulatory subunit 1		19S	1	1.01146	1.0973		0.068	0.1191	0.0235
Rpn1/S2	Q13200	PSMD2	26S proteasome non-ATPase regulatory subunit 2		19S	1	1.03082	1.06209		0.0751	0.1214	0.0141
Rpn3/S3	O43242	PSMD3	26S proteasome non-ATPase regulatory subunit 3		19S	1	0.922737	0.887089		0.0826	0.16	0.0438
Rpn7/S10	Q15008	PSMD6	26S proteasome non-ATPase regulatory subunit 6		19S	1	1.00582	1.00678		0.0493	0.1468	0.0562
Rpn8/S12	P51665	PSMD7	26S proteasome non-ATPase regulatory subunit 7		19S	1	0.971133	1.01683		0.0454	0.1508	0.0428
Rpn12/S14	P48556	PSMD8	26S proteasome non-ATPase regulatory subunit 8		19S	1	0.900959	0.932349		0.0765	0.1474	0.0309
Rpn6/S9	O00231	PSMD11	26S proteasome non-ATPase regulatory subunit 11		19S	1	0.882408	0.894129		0.0736	0.1644	0.034
Rpn5	O00232-1	PSMD12	26s proteasome non-atpase regulatory subunit 12		19S	1	1.12116	1.14457		0.0616	0.1412	0.0138
Rpn9/S11	Q9UNM6	PSMD13	26S proteasome non-ATPase regulatory subunit 13		19S	1	1.02679	1.00678		0.0548	0.1427	0.0391
Rpn11/Poh1	O00487	PSMD14	26S proteasome non-ATPase regulatory subunit 14		19S	1	1.13406	1.26727		0.0665	0.0471	0.1557
Rpt2	P62191	PSMC1	26S proteasome regulatory subunit 4		19S	1	0.942095	0.918268		0.1116	0.1077	0.0307
Rpt1	P35998	PSMC2	26S proteasome regulatory subunit 7		19S	1	0.974359	0.935366		0.0855	0.1662	0.0344
Rpt5	P17980	PSMC3	26S proteasome regulatory subunit 6A		19S	1	0.937256	0.948441		0.094	0.1115	0.0196
Rpt3	P43686	PSMC4	26S proteasome regulatory subunit 6B		19S	1	0.950161	0.976603		0.0802	0.1113	0.0111
Rpt6	P62195-1	PSMC5	26S proteasome regulatory subunit 8		19S	1	0.952581	0.903181		0.1023	0.1247	0.0207
Rpt4	P62333	PSMC6	26S proteasome regulatory subunit 10B		19S	1	0.900153	0.874014		0.152	0.0971	0.0207
a6	P25786-1	PSMA1	Proteasome subunit alpha type-1		19S	1	1.03485	0.941401		0.1017	0.0885	0.0699
a2	P25787	PSMA2	Proteasome subunit alpha type-2		20S	1	1.11229	1.09428		0.0873	0.1273	0.0293
a7	P25788-1	PSMA3	Proteasome subunit alpha type-3		20S	1	0.983231	0.957493		0.1407	0.1249	0.0125
a3	P25789	PSMA4	Proteasome subunit alpha type-4		20S	1	1.08083	1.00175		0.1211	0.1242	0.0354
a5	P28066-1	PSMA5	Proteasome subunit alpha type-5		20S	1	1.04615	1.03393		0.103	0.1303	0.0704
a1	P60900	PSMA6	Proteasome subunit alpha type-6		20S	1	1.11632	0.959505		0.1215	0.1137	0.0449
a4	O14818-1	PSMA7	Proteasome subunit alpha type-7		20S	1	0.971939	0.897147		0.1079	0.1194	0.0311
b6	P20618	PSMB1	proteasome subunit beta type-1		20S	1	1.08647	0.988672		0.035	0.1452	0.1662
b4	P49721	PSMB2	proteasome subunit beta type-2		20S	1	1.01549	0.975597		0.0565	0.1374	0.0927
b3	P49720	PSMB3	proteasome subunit beta type-3		20S	1	1.23085	1.1154		0.1122	0.1426	0.001
b7	P28070	PSMB4	Proteasome subunit beta type-4		20S	1	1.42444	1.32058		0.0516	0.1308	0.0114
b5	P28074-1	PSMB5	proteasome subunit beta type-5		20S	1	1.21392	1.00778		0.0843	0.0889	0.0444
b1	P28072	PSMB6	Proteasome subunit beta type-6		20S	1	0.892087	0.766397		0.1028	0.0974	0.0341
b2	Q99436	PSMB7	Proteasome subunit beta type-7		20S	1	1.01146	0.958499		0.0623	0.1001	0.0544

## Sheet: PIPs
						Abundance Ratio
						WT/WT	C88S/WT	EWI/WT
					Average 19S	1	1.23979	0.994263
						normalized by 19S				Grouped abundances CV
Protein name	Accession	Gene Name	Description		Categorization	WT	C88S	EWI		WT	C88S	EWI
Ub	P62987	UBA52	Ubiquitin-60S ribosomal protein L40		Ub	1	1.55994	1.05606		0.1335	0.111	0.1687
PAC2	Q969U7	PSMG2	Proteasome assembly chaperone 2		chaperones	1	0.775132	0.891112		0.0623	0.0372	0.1113
S5B	Q16401	PSMD5	26S proteasome non-ATPase regulatory subunit 5			1	1.30829	1.29342		0.0627	0.1877	0.1172
P28/Gankyrin	O75832	PSMD10	26S proteasome non-ATPase regulatory subunit 10			1	1.33894	1.14356		0.0782	0.1867	0.0483
Rpn10	P55036-1	RPN10	26S proteasome non-ATPase regulatory subunit 4		Ub receptors	1	0.688827	0.69197		0.1219	0.1059	0.1688
Rpn13	Q16186	RPN13	Proteasomal ubiquitin receptor ADRM1			1	1.19536	1.17575		0.0355	0.0179	0.0102
HR23A	P54725	RAD23A	UV excision repair protein RAD23 homolog A			1	0.852564	1.11339		0.0097	0.1554	0.0541
HR23B	P54727	RAD23B	UV excision repair protein RAD23 homolog B			1	1.52929	1.19485		0.0991	0.1661	0.0871
Ubiquilin-1	Q9UMX0	UBQLN1	Ubiquilin-1			1	0.880795	0.740247		0.0735	0.142	0.0327
DDI2	Q5TDH0	DDI2	Protein DDI1 homolog 2			1	0.906606	0.94643		0.203	0.1647	0.0286
PA28⍺	Q06323	PSME1	Proteasome activator complex subunit 1		Regulators	1	1.60511	1.32158		0.0419	0.1333	0.1722
PA28beta	Q9UL46	PSME2	Proteasome activator complex subunit 2			1	1.38975	1.21195		0.1163	0.1195	0.0774
PA28gamma	P61289	PSME3	Proteasome activator complex subunit 3			1	1.1139	1.09931		0.0057	0.1333	0.2208
PA200	Q14997	PSME4	Proteasome activator complex subunit 4			1	0.996137	1.05807		0.0054	0.1601	0.1226
ECM29	Q5VYK3	ECM29	Proteasome adapter and scaffold protein ECM29			1	0.800136	1.00778		0.0153	0.1252	0.0936
UBLCP1	Q8WVY7	UBLCP1	Ubiquitin-like domain-containing CTD phosphatase 1			1	0.759806	0.899158		0.0909	0.04	0.0016
USP14	P54578	USP14	Ubiquitin carboxyl-terminal hydrolase 14		DUBs	1	1.40588	1.32862		0.1375	0.1263	0.0401
Uch-L5	Q9Y5K5	UCH37	Ubiquitin carboxyl-terminal hydrolase isozyme L5			1	0.724317	0.633635		0.062	0.1688	0.0701
USP5	P45974-1	USP5	Ubiquitin carboxyl-terminal hydrolase 5			1	0.921931	0.742258		0.1245	0.0479	0.2143
USP15	Q9Y4E8	USP15	ubiquitin carboxyl-terminal hydrolase 15			1	1.07518	1.17876		0.0314	0.0109	0.0053
UBE3A/E6AP	Q05086	UBE3A	Ubiquitin-protein ligase E3A		E3 Ligases	1	1.08325	1.17273		0.0226	0.1179	0.0368
UBE3C	Q15386-1	UBE3C	Ubiquitin-protein ligase E3C			1	1.1139	1.10132		0.0769	0.1823	0.1325
HUWE1	Q7Z6Z7	HUWE1	E3 ubiquitin-protein ligase HUWE1			1	0.917898	0.861945		0.0052	0.1172	0.1179
VCP	P55072	VCP	Transitional endoplasmic reticulum ATPase			1	1.07276	1.00577		0.0194	0.0998	0.0998

## Sheet: Identified proteins
Accession	Description	# Uniq	# PSMs	Cov [%]					Abundances (GFP control))						Abundances (WT)						Abundances (C88S)						Abundances (EWI)
					Protein FDR Confidence: Combined	# Peptides	MW [kDa]		R_ 1-1	R_1-2	R_2-1	R_2-2	R_3-1	R_3-2	R_ 1-1	R_1-2	R_2-1	R_2-2	R_3-1	R_3-2	R_ 1-1	R_1-2	R_2-1	R_2-2	R_3-1	R_3-2	R_ 1-1	R_1-2	R_2-1	R_2-2	R_3-1	R_3-2
Q15149-4	Isoform 4 of Plectin	98	284	27	High	101	515.9	0	2128.9	2525.9	2938.5	3490.2	2812.7	3349.2	5597.6	6870.4	7558.5	9096.7	7209.7	8849.3	2789.6	1901.6	3868.7	2730.8	3736.8	2543.3	1714.4	2095.6	2323.2	2752.7	2231.4	2744.1
Q13085-1	Acetyl-CoA carboxylase 1	62	212	31	High	62	265.4	0	483.9	598.3	755.1	963.7	577.7	664.7	1162.1	1082.9	1895.8	1773.2	1345.7	1176.5	959.5	944.4	1408.8	1453.6	1156.7	1201	717.7	774.2	1233.5	1325.3	965.3	1040
P46940	Ras GTPase-activating-like protein IQGAP1	48	138	38	High	48	189.1	0	1385.9	1731.3	1564.8	1961.5	1553.8	1905	4773.5	5337	5611.8	6290.5	5377.8	5981.1	2149.5	1200.5	2520.3	1455.9	2471.7	1433.9	976.5	1275.5	1134.5	1470.7	1122.3	1413.7
Q99460	26S proteasome non-ATPase regulatory subunit 1	46	237	67	High	46	105.8	0	520	597.2	683	856.3	578.8	655.8	3429.7	3094.6	5509.7	5220.8	4291.9	3812.6	3742	4285.7	6102	7267.9	4724.7	5663.8	3295.3	3493.1	5740.8	6043.3	4387.8	4536.4
P49327	Fatty acid synthase	42	141	26	High	42	273.3	0	482	600	911.9	1138.8	785.6	952.6	1758.5	1629.4	3073.6	2742	2831.3	2663.8	1460.6	1400.2	2631.3	2543.4	2386	2251.6	1109.2	1314.6	1980.1	2190.3	1846.3	2042.8
Q13200	26S proteasome non-ATPase regulatory subunit 2	40	242	56	High	40	100.1	0	397.3	519.1	757.6	871	479.3	630.2	4025	3651.4	5978.3	5387.5	4532.6	3941	4556.7	5376	6208.7	7383.6	4900.3	5820.4	4358.6	4273.3	5622.7	5643.7	4459.3	4371.3
P21333	Filamin-A	39	116	25	High	45	280.6	0	802.3	993.3	2220.8	2615	1480.9	1804.9	2320.3	2571.2	6288.2	6915.6	4153	4830.2	1281	671.2	3409.1	1818	2222.5	1071.4	589.6	696.5	1484	1778.3	893.6	1140.2
O43707	Alpha-actinin-4	38	251	69	High	56	104.8	0	3242.7	3290.6	5148.6	5440.1	3952.2	4161.4	8152	8687.9	13512.3	14635.5	10292.5	10944.2	4284.3	2147.4	6307.9	3087.5	4963.2	2232.7	1726.1	2157.6	2518.6	3241.2	1816.5	2470.2
Q00610-1	Clathrin heavy chain 1	32	86	28	High	32	191.5	0	293.3	407.2	399.2	549.8	371.9	479.7	1236.4	1281.6	1348.9	1356.7	1356.3	1376.4	990.8	722.9	1132.2	820.3	1144.2	836.2	607	691.9	694.6	788	707.3	825.9
O43242	26S proteasome non-ATPase regulatory subunit 3	31	160	55	High	31	60.9	0	283.2	367.7	652.3	760.3	444.4	544.2	2381.1	2088.5	4447.6	3928.5	2912.8	2599.3	2260.9	2876.3	4261.1	5360.8	2856.9	3528.1	1836.7	2019	3587.9	3756.4	2413.4	2504.8
P35998	26S proteasome regulatory subunit 7	30	153	64	High	30	48.6	0	360	403.9	374.4	454.1	456.2	471.8	3509.6	3064.7	3816.6	3294.3	3679.2	3348.4	3586	4603.6	3696.6	4597.1	3816.9	4833.7	3018.8	3210.7	3062.5	3243.7	3228.7	3389.5
Q15008	26S proteasome non-ATPase regulatory subunit 6	29	153	72	High	29	45.5	0	432.8	471.1	477.9	508.8	394.7	417.1	2525.2	2355.1	3190.5	3153	2198.9	2078.8	2723.7	3206.5	3330.1	4126.2	2616.5	3070.2	2344.9	2533.6	3037.2	3309.8	2101.1	2310
P43686	26S proteasome regulatory subunit 6B	29	137	72	High	30	47.3	0	179.7	253.8	369.5	578.2	291.1	370.5	1831.4	1584.5	3715.6	3560.4	2341.3	2090	2072.3	2432.5	3719.9	4355.6	2319.6	2720.4	1790.3	1813.1	3343.2	3291.1	2031.7	2059.6
O00231	26S proteasome non-ATPase regulatory subunit 11	27	133	69	High	27	47.4	0	237.4	270.8	345.6	388.4	281.6	331.1	2452.2	2241.5	3712.2	3362.2	2574.4	2319.8	2437.7	3097.3	3352.6	4234.6	2430.1	2910	2103.9	2177.9	3222.5	3330.2	2120.5	2224.9
O00232-1	26s proteasome non-atpase regulatory subunit 12	27	161	61	High	27	52.9	0	246	279.3	449.2	539.4	439.2	458.5	1840.7	1759.2	3377.9	3052.9	3557.2	3157.1	2364.4	2811.2	4067.9	4929.6	4135.6	5068.7	2142.1	2167.4	3545.7	3610.7	3714.8	3788.1
P17980	26S proteasome regulatory subunit 6A	26	133	69	High	26	49.2	0	139	162.9	484.7	483.1	230.6	269.1	1391.8	1226	2779.8	2372.1	1730.7	1515	1711.5	1930.5	2705.5	3109.4	1730.7	2036.9	1470.2	1480.9	2409.2	2289.6	1474.3	1506.4
P62195-1	26S proteasome regulatory subunit 8	26	136	66	High	28	45.6	0	260.6	316.1	611.6	669	422.2	508.5	2078	1798.7	3457.2	2992	2974.2	2573	2201.2	2678.9	3452.2	4070.6	2885.9	3420.9	1936.6	1801.1	2873.9	2840.6	2469.4	2370.5
P13645	Keratin, type I cytoskeletal 10	26	135	51	High	28	58.8	0	2292.3	4086.5	3992.3	6970.3	2689.4	4817.3	3112.4	2384.6	5360.5	4089.3	3614.7	2737.9	1639.7	1576.7	2667.2	2440.7	1793.9	1665.1	1359.1	1282.1	1806.1	2008.7	1336.7	1390.6
P04264	Keratin, type II cytoskeletal 1	26	123	51	High	31	66	0	3487.3	4951.4	7483.8	10854.3	5263.3	7561.8	3676.1	2567.4	8222.8	5715.8	5605.4	3961.5	1452.8	1378.8	3290.9	2888.8	2235.4	2039.5	1110.7	1264.7	2380.3	2632.3	1646.4	1950.7
Q5VYK3	Proteasome-associated protein ECM29 homolog	26	87	20	High	26	204.2	0	123.4	154.2	276.1	349.2	273.6	327.3	891.5	882.3	1589.6	1569.6	1802.8	1718.3	775.5	909.8	1440.8	1720.7	1575	1976.2	761.4	901.6	1502.1	1699.4	1673	1930.4
P35527	Keratin, type I cytoskeletal 9	25	89	53	High	26	62	0	2107.6	2582.6	3038.3	3790.6	1998.2	2548.1	2525.4	1376.5	3769.1	2002.5	2803	1545.7	769.2	669.7	1079.1	975.7	845.6	723	599.2	728.1	844.7	984.6	671.1	752.6
P05165-1	Propionyl-CoA carboxylase alpha chain, mitochondrial	25	67	41	High	25	80	0	131.5	162.7	239.7	290.2	203.2	304.6	312.2	281.1	587.9	485.2	426.8	398.8	232	248.4	407.6	473.5	408.3	343.3	200.5	197.1	293	363.8	257.5	293.9
P11498	pyruvate carboxylase, mitochondrial	25	75	31	High	25	129.6	0	172.9	250.5	300.9	362.9	173.2	208.8	451.9	391.3	709.6	641.5	457.3	444.3	344.8	359.6	552.5	582.1	407.9	453.3	246.6	281.2	417.5	503.2	327.5	348.8
P13639	Elongation factor 2	24	93	38	High	25	95.3	0	449.4	600.6	649.5	844.3	525.3	699.2	1470.4	1387.3	2222.2	2075.4	1736.7	1655.8	1411	1313.1	2050.4	1892	1598.4	1532.5	973.4	1059.5	1407.8	1668.8	1242.4	1346.4
P62191	26S proteasome regulatory subunit 4	23	98	62	High	25	49.2	0	157.3	189.2	376.9	502.3	256.9	288	1054.4	892.4	2628.5	2243.9	1950.5	1740.4	1241.7	1352.9	2601.8	2959.5	1928.6	2246.5	1045.6	1028.1	2259.3	2150.5	1661.3	1590.7
Q92616	eIF-2-alpha kinase activator GCN1	23	48	13	High	23	292.6	0	148.9	148.9	245.8	312.8	138.2	173.5	508.6	499.3	892.4	886	583.4	568.8	467.1	480.7	784.4	786.6	503.2	505.1	355	390.9	601.6	788.3	425.8	472.1
Q9UNM6	26S proteasome non-ATPase regulatory subunit 13	22	137	66	High	22	42.9	0	179	250	202.6	235.3	189.3	189.4	2625.8	2429.9	3461.8	3059.4	2472.8	2220.4	2959.6	3534	3592.8	4667.7	2754.9	3385	2460.3	2600.4	3048.5	3442.4	2278.9	2363.2
Q9Y5K5-1	Ubiquitin carboxyl-terminal hydrolase isozyme L5	20	125	68	High	20	37.6	0	248.7	267.4	262.7	261.4	219	191	4416.6	4117.3	7745	7043.3	4369.4	4002.6	3638.1	4452.2	5507.8	7078.5	3330.5	4309.1	2962.1	3173.6	4167.5	4618.6	2506.2	2767.5
Q15386-1	Ubiquitin-protein ligase E3C	20	58	23	High	20	123.8	0	78.7	103.1	151.6	197.4	166.4	178.1	731.8	656.4	1150.6	1084.4	1132.7	989.7	885.4	1089.9	1410.3	1827.8	1207.4	1548	710.5	849.6	1158.9	1398.5	1024.8	1197.3
P12814-1	Alpha-actinin-1	19	162	50	High	37	103	0	606.6	662.2	800	851	709.8	755.8	1914	2087.9	2376.8	2533.7	2104.4	2265.9	975.5	428.3	1288.5	657.6	1141.9	541.5	387	482.6	539.1	692.9	461	610
O75369-1	Filamin-B	19	54	13	High	24	278	0	194.2	267.3	475.5	574.3	434.2	536.1	679.9	903.1	1320.4	1649.1	1284.6	1519.4	343.7	181.8	712.6	505.6	692.7	456.5	137.7	185.4	380.7	491.4	345.2	447.4
P25786-1	Proteasome subunit alpha type-1	18	86	67	High	18	29.5	0	160.1	197.2	454.2	456	318.7	337.1	1279	1093.3	2107.2	1816.1	1545.9	1338.4	1380	1623.9	2403.9	2709.5	1734	1911.5	1132.7	1026	1980.4	1775.7	1397.4	1188.3
O95714	E3 ubiquitin-protein ligase HERC2	18	45	6	High	18	526.9	0	90.6	106.1	232.9	283.1	74.8	103	676	695.6	948.9	972.9	544.3	577	406.9	481.6	577.3	685.7	274.1	346.4	560.6	633.5	678	787.7	459.1	520.3
P11142-1	Heat shock cognate 71 kDa protein	18	89	50	High	23	70.9	0	372.3	439.5	750.1	928.6	476.5	555	1208	1145	2193.2	2051.4	1658.1	1533.9	849.1	887.8	1473.2	1527	1098.2	1095.9	767.5	853.7	1311.1	1336.1	951	1006.5
Q16401	26S proteasome non-ATPase regulatory subunit 5	17	59	54	High	17	56.2	0	83.6	99	178.8	180.9	94.7	103.7	510.5	469.6	942.3	846.7	676.6	632.8	724.6	886	1227.1	1618.5	939.1	1237.6	519	667.5	1066.5	1218.6	786.9	932.8
P48556	26S proteasome non-ATPase regulatory subunit 8	17	78	53	High	17	39.6	0	143.1	188.7	223	279.7	168.9	220.8	1474.8	1332	1914.4	1729.6	1346.1	1188.4	1438.3	1840	1767.3	2143	1266.4	1561.1	1279.1	1412.1	1432.6	1537.7	1141.7	1192.7
P62333	26S proteasome regulatory subunit 10B	17	66	43	High	17	44.1	0	138.6	180.4	386.1	501.7	229.8	253.7	1062.8	852.6	2214.2	1896.3	1421.2	1141.5	993.6	1140.1	1977.1	2315.2	1343.4	1572.3	840.9	816.6	1669.4	1652	1137.3	1095.1
P08238	Heat shock protein HSP 90-beta	17	74	36	High	22	83.2	0	296.2	402	536.8	717.5	235.3	306.4	1310.2	1040.4	2322	1940.9	962.5	824.8	1511.4	1562.7	2523.1	2557	1183.5	1164.8	1018.1	1116.2	1748	1806.2	765	839.5
P25788-1	Proteasome subunit alpha type-3	16	86	47	High	16	28.4	0	209.4	250.8	293.4	405.5	256.8	304.8	1490.1	1235.1	2397.6	1963.6	1605.5	1319.4	1390.5	1661.3	2421.3	2890.6	1642.7	1956.4	1135.9	1161.2	2139.2	2054.2	1408.9	1384.3
P78527	DNA-dependent protein kinase catalytic subunit	16	39	5	High	16	468.8	0	179.8	205	193.1	234.9	115.5	138.3	570.2	598.1	673.1	695	418.7	443.3	479.5	534.5	613.7	610.1	414	336.9	412.3	505.4	504	564.4	257.5	314.5
P35908	Keratin, type II cytoskeletal 2 epidermal	16	68	47	High	22	65.4	0	1080.5	2179.4	2160.6	4212.3	1099	2077.2	1583.9	1189.3	2909.6	2421.1	1379.5	1117.2	901.9	678.6	1908.6	1342	869.9	676.6	553.2	689.7	1106	1322.8	505.2	575.4
P05166-1	propionyl-CoA carboxylase beta chain, mitochondrial	16	71	41	High	16	58.2	0	99.5	102.1	338.7	395.4	257.1	297.7	267.9	274.4	610.4	588	471.1	450.3	228.4	247.1	549.8	560.6	410	416	163.5	177.5	419.2	466.1	293.8	316
Q99832	T-complex protein 1 subunit eta	16	47	41	High	16	59.3	0	230.9	286	225	289.2	317.4	321.3	679.9	595.6	807.3	730.9	739.4	629.2	615	577.2	786.2	779.2	647.3	656.8	422.7	486.3	561.6	619.8	504	531
P40227-1	T-complex protein 1 subunit zeta	16	56	43	High	16	58	0	331.2	397.8	287.7	336.1	202.4	269.8	945.7	789.5	829.4	728.6	743.3	690.2	967.5	965	847.1	813	777	719.1	696	740.9	579.9	637.4	561.7	595
P25789	Proteasome subunit alpha type-4	15	69	67	High	15	29.5	0	121.9	170.5	255	420.2	117	154.4	1223.6	976.9	2153.5	1910.6	1364.8	1149.5	1280.9	1436	2368.1	2858.3	1537.2	1833.2	984.9	944.5	1960	1968.5	1216.7	1279.1
O14818-1	Proteasome subunit alpha type-7	15	79	69	High	15	27.9	0	165.7	220.8	240.7	279.6	227.4	313.8	1158.1	988.2	2272.2	1909.8	1899.9	1630.6	1178	1413.5	2373.3	2908.3	1949.2	2296.7	936.1	939.9	1851.7	1943	1604.1	1524.5
P20618	proteasome subunit beta type-1	15	81	72	High	15	26.5	0	91.7	95.4	161.3	188.6	110.2	164.9	747.8	715	1857.8	1829.7	1099.7	1046.5	966.9	1231.7	2155.4	2687.6	1303.5	1592.6	683	875.9	1573	2019.8	964.8	1182.9
P49721	proteasome subunit beta type-2	15	100	74	High	15	22.8	0	193.4	241.7	353.1	396.2	246.2	317.6	1304	1273.5	1973.5	1837.2	1630	1479.7	1421.9	1733.7	2184.2	2654.2	1764	2139.6	1099.6	1287	1680.9	1946.9	1458	1621.9
Q9HCC0-1	Methylcrotonoyl-CoA carboxylase beta chain, mitochondrial	15	45	40	High	15	61.3	0	66.1	94.4	130.4	172.8	78.5	84.2	170.9	158.1	319.3	302.7	200.8	212.4	146.1	159.6	283.3	315.1	169.4	173.5	115	134.1	294.7	258.1	151.1	193.4
Q13813	Spectrin alpha chain, non-erythrocytic 1	15	39	9	High	15	284.4	0	191.5	219.5	448.1	524.7	213.1	235.2	587.2	702.1	1332.8	1479.5	801.6	873.9	420	286.3	864.3	602	473.1	333.8	269.7	239	530.9	537.9	314.9	305.5
P17987	T-complex protein 1 subunit alpha	15	47	30	High	15	60.3	0	226.5	287.7	242.7	324.2	294.6	360.4	857.7	685.5	754.4	679.4	898.9	806.6	836.5	818.6	761.2	737.5	813	840.3	586.9	622.5	533.4	589	621.5	635.3
P51665	26S proteasome non-ATPase regulatory subunit 7	14	91	58	High	14	37	0	125	155.1	256.6	329.7	205.4	278.9	1102.8	1050.1	1584.1	1480.9	1353.4	1269.3	1289.6	1492.3	1660.3	1999	1418.4	1757	1029.2	1109.6	1508.7	1546.2	1301.9	1385.6
P28074-1	proteasome subunit beta type-5	14	67	58	High	14	28.5	0	88.2	113.2	335.7	393.5	172.5	215.3	525.7	477.3	1579	1352.7	883.2	783.8	781.8	875.1	1754.6	2178.6	1176.2	1372.6	564.5	522.3	1413.8	1382.5	923.5	808
P53621-1	coatomer subunit alpha	14	32	14	High	14	138.3	0	395.6	440.8	444.1	532.9	298.4	329.8	431.7	389.9	528.2	500	318.5	308.5	648.3	738.4	815.4	919.8	521.9	575.7	609	693.4	734.9	886.4	510.6	545.4
P15311	Ezrin	14	74	35	High	21	69.4	0	848.1	1235.8	1751.2	2373.1	1086.4	1546.4	1935.6	1939.9	3558.1	3598	2386.3	2334.9	1831.6	977.7	3466.9	1907.2	2216.1	1240.7	705.5	951.5	1343.9	1811	884.7	1179.8
P14923	Junction plakoglobin	14	57	35	High	19	81.7	0	616.4	849.8	786	1020.2	731.2	884.3	1223	1253	1553	1674.2	1359.9	1502.7	556.8	470.5	715.5	595.2	606.1	658.9	381.1	476.6	522.5	628.8	588.6	639.7
P05783	Keratin, type I cytoskeletal 18	14	48	43	High	16	48	0	332.1	459.4	462.2	617.6	490.1	693.9	893	1366	1166.2	1694.8	1264.7	1780.5	424.7	220.1	555.4	296.4	594.8	334.9	235.7	278.2	274.1	321.5	323.9	412.1
Q14997	Proteasome activator complex subunit 4	14	43	11	High	14	211.2	0	58.7	76.7	131.2	148.1	86	113.5	336.6	346.4	571.4	577	462.1	417.1	380.5	458.9	643.2	793.9	479.5	629.9	505.9	430.9	531.6	658.5	427.9	499.7
P78371-1	T-complex protein 1 subunit beta	14	36	34	High	14	57.5	0	147.4	210.4	125.7	251.4	219.2	342.6	557.9	523.6	471.3	459.3	781.9	713.2	585	540.3	474.7	469.7	777	772.6	398.7	441.5	329.4	389.3	559.7	603.1
P60900	Proteasome subunit alpha type-6	13	65	51	High	13	27.4	0	172.1	254	211.7	279.8	183.4	217.8	1449.7	1264.8	1858.8	1513.7	1475.2	1241.9	1763.7	2081.1	2178.3	2498.6	1728.6	2030.9	1307.6	1281.3	1680	1587.8	1351.4	1187.4
P08727	Keratin, type I cytoskeletal 19	13	53	55	High	19	44.1	0	417.8	557.9	613.4	808	505.6	591.9	826.4	1089.4	1061.1	1392.8	866.5	1115.5	455.3	317.9	617.7	422.7	538.4	332	258.9	316.4	318.3	411.2	283.3	346.2
P13797	Plastin-3	13	53	36	High	18	70.8	0	560.1	652.2	1040.9	1205.3	836.8	923.1	1291.1	1266.8	2423.5	2416.7	1807.5	1714.8	1201	587.8	2398.7	1123.5	1602.9	810.6	375.7	486.9	695.3	937.5	542.2	659.3
P49368-1	T-complex protein 1 subunit gamma	13	45	29	High	13	60.5	0	142.7	211.2	321.8	415.6	210	283.7	516.8	766.1	1117.8	1341.1	805.6	931.4	582.1	545.1	1097.1	1025.5	830.7	771.1	376.9	391.5	725.3	812.6	523.2	558.4
P10809	60 kDa heat shock protein, mitochondrial	12	23	26	High	12	61	0	93.5	113.9	99.5	129.5	149.7	168.4	180.7	153.5	189.1	184.4	309.2	291.6	123.7	147.3	139.2	161.3	236.6	271.5	106.8	109.3	108.7	120.6	195.8	228.7
P27708	CAD protein	12	17	8	High	12	242.8	0	110.6	124.4	23.3	31.4	102.5	119.6	399.2	370.2	99.4	101.8	331.1	319.8	330.2	330.7	80	84.6	287.4	309.2	254.3	291.8	72.4	82.6	227.3	262.9
Q8IXB1-1	DnaJ homolog subfamily C member 10	12	35	24	High	12	91	0	583.7	721.1	764	878.6	701.4	825.9	878.7	768	1291.4	1203.5	1125.8	1016.6	542	734.5	799.8	1033.2	703.4	921.3	397.3	512.2	547.8	838	469.2	633.5
Q16658	Fascin	12	28	40	High	12	54.5	0	164.4	204.8	253	297.7	342.6	412.9	462	407.1	738.4	705.7	858.9	766.8	512	296.5	961.3	618.4	1059.4	599.6	172.7	204.9	402.3	459.1	365.9	397.4
Q14974	Importin subunit beta-1	12	38	21	High	12	97.1	0	100.2	104.1	156.3	166.4	102.8	116.6	576.9	539	846.2	771.6	433.1	403.5	600.2	683.2	868.3	1018.5	461	519.1	448.7	495.7	613.9	692.5	311	342.5
P05787	Keratin, type II cytoskeletal 8	12	72	35	High	17	53.7	0	518.2	674.5	969.9	1352.7	815.4	1200.8	1079.1	1570.3	2230.4	3172.8	1839.5	2609.4	729.2	397.6	1120.4	602.3	865.9	422.7	351.2	395.2	481.9	667.4	356.4	522.9
P14618	Pyruvate kinase PKM	12	22	29	High	12	57.9	0	61.1	83	237.2	258.1	63.5	87.6	193.1	182.5	436.4	428.8	193.6	176.1	249.1	249.4	497	500.4	267.9	257.9	141.9	170.7	307.9	328.9	169.9	189.2
P50991	T-complex protein 1 subunit delta	12	37	26	High	12	57.9	0	233.2	281.9	405.4	491.1	183.8	233.3	680.5	646.9	1226.2	1111.7	511	478.8	543.6	529.6	1034.9	993.8	421.3	401.7	360.7	420.7	670.4	740.2	306.5	310.9
P48643	T-complex protein 1 subunit epsilon	12	33	32	High	12	59.6	0	134.2	146.9	237.6	323.7	159.7	215.1	457.7	449.2	846.6	776.9	542.5	489.7	448.6	411.5	755.1	756.2	531.5	528.2	294.7	349.1	557.8	636.6	369.5	418.5
P26640	Valine--tRNA ligase	12	18	12	High	12	140.4	0	56.1	75.8	111	153.9	13.5	22.8	200.6	177	372.2	330.1	73.6	59.4	165.1	166.1	331.9	375.4	63.4	57.7	120.7	132.1	278.3	291.5	40.7	52.6
O00487	26S proteasome non-ATPase regulatory subunit 14	11	42	55	High	11	34.6	0	106.3	100.9	192	185.9	97.9	114.6	442.5	391.6	698	659	499.8	442.6	587.9	596.7	825.3	879.8	652.2	772.4	463.1	648.9	652.6	759.2	554.4	675
P55036-1	26S proteasome non-ATPase regulatory subunit 4	11	46	37	High	11	40.7	0	101.2	124.4	131.7	184.2	76.2	75	1193.2	1008.6	1281.9	1063.5	698.2	586.5	870.8	1028.2	907.2	1067.5	501	580.4	718.2	825.6	716.7	912.3	385	540.9
P25787	Proteasome subunit alpha type-2	11	63	59	High	11	25.9	0	98.1	107	123.8	142.9	56.8	84.5	1163.9	1028.6	2060.1	1819	963.8	825.1	1378.7	1651.4	2403.4	2949.3	1109.3	1342.5	1165.5	1214.9	1943.1	2131	978.8	1012.9
P07814	Bifunctional glutamate/proline--tRNA ligase	11	19	11	High	11	170.5	0	50.5	72.6	96.5	132.1	99.2	113	167.8	164.3	282.2	248.7	280	290.4	145	142.3	216.9	218.2	258.4	265.8	111.2	115	169.6	219	186.8	251.7
Q14204	Cytoplasmic dynein 1 heavy chain 1	11	15	4	High	11	532.1	0	16.4	23.1	93	121.5	52.7	62.6	76.3	75.2	350.5	378.3	195.6	188.6	79.4	67.9	361.6	359.4	176.8	169.5	53.1	63.2	264.6	329.7	147.6	180.8
Q14126	Desmoglein-2	11	29	13	High	11	122.2	0	286.6	384.1	522.5	647	308.4	426.9	518.5	582.8	1067.9	1129	658.4	686.4	189.3	129.7	537.9	459.4	282.4	256.7	131.9	188.5	414.1	495.4	212.9	267.1
O00410	Importin-5	11	25	18	High	11	123.6	0	25.6	30.1	189.6	231.4	83.9	112.2	103.2	111	707.3	649.4	359	379.6	86.8	109.9	596.3	617.3	317.9	338.7	67.3	76.7	456.8	531.6	248.1	287.4
Q16186	Proteasomal ubiquitin receptor ADRM1	11	49	22	High	11	42.1	0	46	63	127	184.9	88.7	140.4	736.4	708.6	1432.2	1363.1	1034.2	948.7	1136	1165.4	2034.5	2095.6	1433.6	1415	875.2	857.6	1621.2	1644.8	1087.3	1097
P50990	T-complex protein 1 subunit theta	11	35	26	High	11	59.6	0	92.4	120.9	180.5	215.5	242	281.8	341.4	295.2	535.6	481.2	717	594.9	323.4	280.2	481.4	476.6	647.5	603.2	210.4	236.9	341.3	368.4	443.6	476.6
P28066-1	Proteasome subunit alpha type-5	10	53	60	High	10	26.4	0	74.1	97.4	235.4	303.1	86.8	110.3	701.5	636.3	1492.3	1353	921.4	796.3	872.5	1029.8	1560.1	1748	1013.2	1218.9	767.2	683.2	1341.6	1330.1	955.7	930.7
P42704	Leucine-rich PPR motif-containing protein, mitochondrial	10	25	11	High	10	157.8	0	109.9	131.6	135.9	156.7	87.5	101.4	204.9	203.2	283.7	331.7	222.2	203.7	165.6	169.8	208.5	212.5	158.9	180.1	145.9	186.1	159.4	205.1	138.4	184
Q9UHB6	LIM domain and actin-binding protein 1	10	32	18	High	10	85.2	0	396.4	456.1	694.2	848.1	421.7	486.9	846.8	945.3	1668.3	1828.3	932.5	1084.1	260.5	177.8	543.5	359.8	296	185.7	131.8	167.5	287.6	369.2	125.5	180.7
P01130	Low-density lipoprotein receptor	10	42	19	High	10	95.3	0	440.5	517.9	877.6	1113.7	639.9	813.5	483.9	451.4	1149.1	1065.2	829.8	725.9	309.5	415	692.4	855.6	506.3	672.5	313	441.4	736.3	1039.8	532.7	663.5
P35579-1	Myosin-9	10	28	9	High	11	226.4	0	114.3	163.1	253.3	351.2	122.2	181.7	370.4	408.4	742.8	762.2	409.2	411.1	321.4	187.2	668.4	477.2	373.2	243.9	204.9	206.7	378.6	429.4	190.4	211.9
Q01082-1	Spectrin beta chain, non-erythrocytic 1	10	22	5	High	10	274.4	0	173.8	223.4	155.2	210.5	171.9	192.3	796.9	1124.3	770.3	1030.6	645.5	723.2	420.7	202	408.5	196.3	374.6	270	365.2	270.9	202.1	253.1	222.2	235.6
P35221	Catenin alpha-1	9	19	12	High	9	100	0	69.4	70.5	288.9	371.3	147.8	194.3	203.7	205.3	895.4	933.3	451.9	486.6	119.7	112.1	494.4	407.9	202.8	146.8	112.3	117	288.2	342.1	115.9	141
P41252	isoleucine--tRNA ligase, cytoplasmic	9	20	8	High	9	144.4	0	38.1	52.5	123.4	128.6	117.9	151.8	156.3	143	393.5	385.8	343.4	331.1	141.6	147.7	342.5	380	269.4	283.6	96.7	109.8	265.1	299.6	204.5	237.9
O43396	Thioredoxin-like protein 1	9	34	52	High	9	32.2	0	59.7	68.7	80.6	81	57.7	75.6	358.7	343.1	538.1	472.3	501.9	441.2	381	455.2	574.9	665.5	560.8	672.9	340.3	359.7	582.8	635.2	520	534.6
P55072	Transitional endoplasmic reticulum ATPase	9	21	13	High	9	89.3	0	72.9	82	85.5	82.3	77.2	92.2	309.3	298.7	316.7	269.6	301.3	294.9	378.2	436.7	416.5	479.7	358.5	419.1	284.8	325.2	310	344.3	277.1	325.7
P54578	Ubiquitin carboxyl-terminal hydrolase 14	9	27	26	High	9	56	0	53.7	89.5	74.8	86.5	79	104.5	499.2	416.9	443.8	395.2	508.5	401.5	759.3	943.2	605.3	694.2	735.2	879.5	590.1	624.5	481.2	527.1	602.3	626.2
Q05086	Ubiquitin-protein ligase E3A	9	23	16	High	9	100.6	0	56.6	62.9	99	123.3	34.9	50.3	223.9	221.7	406.9	394.1	211.1	180.1	266.1	309	519.1	589.7	245	289.6	246.5	267.2	454.9	451.8	228.8	260
P54727	UV excision repair protein RAD23 homolog B	9	32	35	High	10	43.1	0	61.5	77.7	90.8	120.6	99.7	127.3	312.9	293.9	354.7	301.8	548.6	476.7	463.9	640.5	607.6	727.3	867.9	1091	330.6	350.9	365.3	398.1	571	649.7
P49720	proteasome subunit beta type-3	8	46	48	High	8	22.9	0	49.7	74.1	107.3	141.6	61.7	74.7	562.4	478.6	1059.8	928.3	592.7	523.3	699.3	887.6	1392.1	1704.3	759.2	874.2	574.2	575	1110	1096.2	613.5	612.2
P28072	Proteasome subunit beta type-6	8	33	53	High	8	25.3	0	94.9	123.8	127.4	166.8	53.9	60.9	550.9	484.7	747.1	632.1	465.5	348.2	506.6	604.8	725.6	856	446.6	512.7	388	378.3	573.5	570.1	316.5	338
P35222	Catenin beta-1	8	35	23	High	13	85.4	0	37.5	57.7	195.5	227	56.9	65.2	153.1	193.2	569.3	651.3	193.8	232.4	73.1	65.4	285.2	253.4	81.1	64.6	55.4	69.3	221.2	215.6	51.6	75.4
Q6YHK3-1	CD109 antigen	8	13	9	High	8	161.6	0	83.6	117.4	67.9	86.1	21.8	30	182.3	252.1	111.1	99.1	53.3	74.7	102.1	85.3	70.2	66.2	41.2	52.8	102.1	134.2	58.1	76.4	33.2	48.2
P23528	Cofilin-1	8	29	49	High	8	18.5	0	152.6	180.4	475.2	586	232	315.4	322.3	305.9	904.4	946.2	473.8	473.5	295.3	246.8	821	667.5	426.3	386.1	170.3	231.3	423.8	562.1	229.4	317.2
Q16643	drebrin	8	26	19	High	8	71.4	0	127.5	141.3	350.2	409.5	156.6	177.3	309.4	344.4	881.8	989.5	381.5	439.5	92.5	56.4	335.4	260.6	132.5	86.7	50.1	77.3	205.4	236.6	70.9	120.1
Q86Y56	Dynein assembly factor 5, axonemal	8	21	15	High	8	93.5	0	56.4	73.2	78.9	73.8	72.8	97.7	146.1	153.7	254.4	282.7	215.2	226.1	136.9	144.9	197.3	218	182.3	182.8	115.1	129.6	170.3	219.9	137.8	176.6
P68104	Elongation factor 1-alpha 1	8	19	22	High	8	50.1	0	98.8	130	124.1	164.7	191	245.3	244.8	216.6	343.8	294.5	508.6	413.1	216.1	201.1	235.2	213.1	325.7	287.8	145.8	141.3	153.6	167.2	186.1	206.5
P26641	elongation factor 1-gamma	8	27	27	High	8	50.1	0	144.3	183.9	159.6	205.7	173.1	228.5	514.3	466.2	509.5	481.6	614.4	570.6	426.6	418.1	440.2	434.8	512.3	482.7	301.7	371.4	300.7	392.1	353.2	475.9
P55060-1	Exportin-2	8	20	12	High	8	110.3	0	23.8	34.7	126.7	142.5	116.8	150.1	126.8	107.7	643	591.9	456.4	436.2	121.9	134	681.5	744.7	437.4	439.4	107.6	132.3	564.8	628	339.6	385.5
P07900	Heat shock protein HSP 90-alpha	8	35	20	High	12	84.6	0	45.3	54	70.8	96	91.8	114.3	187.7	168.8	206.5	196.5	331.5	290.5	186	210.4	220.2	210.6	308.3	292.5	148.1	157.6	135.6	154.5	207.3	210.8
Q8TEX9-1	Importin-4	8	13	12	High	8	118.6	0	42.2	48.3	13.9	18.3	40.7	50.2	141.8	133.8	59.1	68.8	154.9	118.7	120.9	124.6	70.5	77.5	122.9	124	99.1	105.8	52.6	59.7	90.4	117
Q9Y265	RuvB-like 1	8	25	22	High	8	50.2	0	75.2	101.3	172.3	212.1	76.6	92.4	532.2	517.9	917.1	895.5	512.5	502.3	232.2	282.5	387.1	456.6	178.2	216.8	193.1	185.9	320.8	316	162.9	164.4
P10599-1	thioredoxin	8	51	87	High	8	11.7	0	1184.1	1872.8	1958.2	3016.8	838.8	1335.8	1287.3	1128.3	2094.8	1826.1	972.5	858.7	865.5	975.5	1327.9	1600	575.6	668.4	879.7	952.3	1210.3	1506.4	494.8	672.3
Q71U36	tubulin alpha-1A chain	8	78	61	High	18	50.1	0	684.8	816.8	1677.1	2042.8	1084.9	1359.3	1244.5	1060.1	2915.5	2552.8	1979.3	1672.3	772.1	868.2	1977.4	2117.9	1340	1371.7	640.2	670	1554.6	1733.2	1032.1	1117.6
P62987	Ubiquitin-60S ribosomal protein L40	8	34	47	High	8	14.7	0	185.4	224.5	134.6	171.5	222.3	267.6	898.7	759.1	742.9	625.4	969	801.8	1372.8	1656.8	1374.5	1514.7	1575.8	1814.9	937.6	737.8	788.1	623	1087.8	837.6
P28070	Proteasome subunit beta type-4	7	37	43	High	7	29.2	0	28.9	43	195.7	259.7	72.5	82.8	259.1	240.9	915.9	785.5	617.1	603.7	402.1	484.1	1172.3	1328.7	1239	1380.1	330.7	333	909.2	869.6	973.4	880.1
Q99436	Proteasome subunit beta type-7	7	39	32	High	7	29.9	0	17.3	33.7	109.9	131.6	63.4	71.5	153.8	156	906.3	829.8	724.5	647.4	201.1	193.4	1050.5	1273.7	786.9	906.8	152	156.4	876.3	875.9	667.1	617.7
P11021	78 kDa glucose-regulated protein	7	31	17	High	9	72.3	0	90.5	107.4	511.2	552.6	221.1	265.1	176.3	150.5	695.5	590.8	293.6	266.4	130.8	142.2	446.2	530.2	195.6	205.2	93.5	100.4	325.4	399.3	143.7	198.9
P61158	actin-related protein 3	7	22	31	High	7	47.3	0	164.3	136.9	222.2	233.9	139.6	148.9	662.8	909	1054.9	1426.4	645.7	951.1	115.9	55.5	370.6	281.9	172.5	106.6	46.7	84.7	203.6	264.8	113.4	143.4
P07355	Annexin A2	7	26	30	High	7	38.6	0	229.9	229	238.8	291.4	302.3	334.8	531.6	615.7	719.7	817.9	800.9	852.8	401.2	292.8	559.4	374.6	647.1	452.7	173.6	210.6	217	254.3	263.7	315.9
P35606	Coatomer subunit beta'	7	20	12	High	7	102.4	0	166.6	190.2	274.8	303.8	330.4	365.1	151.7	139.1	309.9	300.1	298.4	265.6	303.2	360.5	524.4	620.9	515.6	604.6	303	348.8	501.3	589.2	492.7	569.8
Q5T4S7-1	e3 ubiquitin-protein ligase UBR4	7	13	2	High	7	573.5	0	52.2	63.9	64.7	88.7	96.3	159.8	167.8	181.6	294.1	320	221.4	171.2	222.1	231.8	353	405	175.5	201.7	163.5	216.8	263.5	323.6	151.6	169.4
Q14157-1	Isoform 2 of Ubiquitin-associated protein 2-like	7	16	10	High	7	103.9	0	112.1	112.3	35.8	46.9	106	124.1	159.4	143.2	108.4	102.3	204.1	185.3	106.7	106.3	78.1	73.6	147.4	134.3	78	98.1	42.1	70.4	126.6	116.5
Q96RQ3	Methylcrotonoyl-CoA carboxylase subunit alpha, mitochondrial	7	31	12	High	7	80.4	0	43.9	69	118.3	150.5	73.6	98.8	127.7	119.7	325.9	298.9	204.7	200.2	103.4	108.7	308.7	331.4	169	174.6	89.7	78.6	268.8	261.2	135.3	132.8
Q04721	Neurogenic locus notch homolog protein 2	7	13	5	High	7	265.2	0	119.6	140	224.3	263.7	151.6	155.4	206.1	168.7	347.3	280.8	244.1	199.4	102.9	136.8	202.5	227.3	135	167.7	90.4	105.6	173.7	205.3	114.3	129.3
Q9Y490	Talin-1	7	18	6	High	7	269.6	0	63.6	71.9	84.8	97.2	53.9	84.1	201.3	197.6	286.5	315.4	234.6	248	205.4	153.5	290.6	231.4	237.9	160.5	113.5	141.8	164.6	216.1	123	166
P13010	X-ray repair cross-complementing protein 5	7	15	11	High	7	82.7	0	36.6	38.4	96.7	103.4	100.9	104.4	126.6	171.1	303.2	401.7	343.9	476.1	99	118.8	281.6	293.5	252.7	295.4	69.8	79.9	205.4	218.8	201.7	240.4
P12956	X-ray repair cross-complementing protein 6	7	15	13	High	7	69.8	0	54.3	67.6	131.9	138.5	57.7	60.2	227.4	313.2	468.7	622	213.7	320.1	157.2	170.2	353.6	377.9	185.1	181	120.9	152.8	261.2	301.3	116.8	143.6
O75832	26S proteasome non-ATPase regulatory subunit 10	6	21	20	High	6	24.4	0	41.5	65	96.1	103.3	32.1	44.7	351.6	305.8	628.1	568.4	309	266	453.4	615	863.9	1083.2	427.4	556.4	373.4	386.8	652	689.9	322.6	345.4
P15880	40S ribosomal protein S2	6	16	24	High	6	31.3	0	77	88.9	79.8	100.2	142.5	184.1	182.9	189.5	196.2	206.1	405.9	422	139.5	110.1	162.9	155.6	319.5	290.7	102.1	130.4	106.9	121.3	198.1	269
P60709	Actin, cytoplasmic 1	6	132	57	High	17	41.7	0	1496.9	1575.8	2090.8	2133.9	1398.5	1561.3	3346.1	4599.4	4260.3	5598.4	3437.8	4496.1	1624.8	792.1	2617.8	1236.2	1496.9	707.1	670.5	740.2	1072.8	1196.9	637.2	716.8
Q01518-1	adenylyl cyclase-associated protein 1	6	16	20	High	6	51.9	0	96.8	150	150.8	244.8	37.9	61.5	423.6	404.8	622.9	622.3	200.6	184.3	358.8	233	475.4	360.7	142.3	88.4	163.4	216.1	244.3	342.1	67.4	98.1
P49588	Alanine--tRNA ligase, cytoplasmic	6	15	11	High	6	106.7	0	10.5	19.1	77.1	92.6	24.3	42.8	43	51.7	297	296.2	160.2	150.6	50.2	42.5	233.2	252.6	144.6	147.6	30.6	42	199.9	243.2	117.1	137.4
P06733-1	alpha-enolase	6	12	23	High	6	47.1	0	75.5	97.9	242.9	305.8	43.3	45.8	171	146.2	484.4	416.2	105.3	111	152.8	160	445.7	470.1	116.4	124.7	106.2	118.7	268.6	274.4	76.3	90.9
P06576	ATP synthase subunit beta, mitochondrial	6	10	16	High	6	56.5	0	9.1	9.4	57.4	67.6	34.1	48.9	24.8	29.6	141.2	139.4	102.4	105.2	23.6	24.7	141.4	140.1	94.5	123.1	21.2	19.9	111.5	124.5	70	81.8
O75131	Copine-3	6	14	19	High	6	60.1	0	32.2	50.7	22.1	27.4	73.2	95.2	162.6	169.6	81.8	81.7	287.8	289.1	132.2	122.6	67.4	72	245.4	248.6	101.8	132.1	56.9	77.1	185.8	221.8
P15924-1	Desmoplakin	6	11	4	High	6	331.6	0	37.6	62.9	79.1	123.3	35.4	53.9	67.9	73.1	170.7	176.2	68.3	64.5	45.5	43.9	114.2	110.9	42.5	32.6	35.3	40.5	99.8	108.5	28	31.4
Q96C19	EF-hand domain-containing protein D2	6	11	28	High	6	26.7	0	21.5	20.9	159	182	149	158.1	207.6	335.8	584.4	583.9	756.2	877	22	10.3	173.9	138.6	161.3	118.4	13.9	18.3	100	139	112.9	117.8
P58107	epiplakin	6	19	12	High	8	555.3	0	12.9	15.9	19.9	32.1	32	39	57.1	67.9	81.8	107.4	88.6	110.6	48.6	44	65.4	64.8	92.5	96.3	41.3	55	46.4	73	68.1	89.3
O14980	Exportin-1	6	12	7	High	6	123.3	0	14.2	21.4	57.6	76.2	27.7	29.5	57.2	62.2	248.7	284.8	110.5	124.7	57.2	53.6	298	307.8	107.8	105	47.3	52.2	294.9	251.1	87.1	114
P47756-2	Isoform 2 of F-actin-capping protein subunit beta	6	26	21	High	6	30.6	0	203.4	215.9	311.3	337.2	271.8	289.2	747.8	884.5	1386.6	1836.2	1172.3	1449.3	329.7	169.6	591.9	305.4	495.5	244.9	142.3	190.6	272.4	348.8	235.6	292.6
Q15366-2	Isoform 2 of Poly(rC)-binding protein 2	6	27	31	High	7	38.6	0	137.6	148.9	171.4	246.9	196.1	244.5	341.8	275.3	462.2	445.9	484.4	414.7	262	293.1	386.1	371.7	362.8	363.6	187.1	222.3	270.9	278	282.2	291.4
P04259	keratin, type II cytoskeletal 6B	6	44	27	High	14	60	0	128.8	375	446.3	1176.6	204.6	577.6	160.3	132.9	575.3	446.5	268.5	205.2	96.3	89.2	335.1	303.3	149.5	124.9	79.5	79.9	250.3	280.6	115.9	139.4
Q9P2J5	Leucine--tRNA ligase, cytoplasmic	6	13	6	High	6	134.4	0	16.5	17	98.6	106.3	54.6	64.9	87.6	86.5	286.8	266.6	228	206.9	99.3	90.1	275.6	256.3	246	210.2	53.5	66.8	169.5	175	173	161.1
Q09666-1	Neuroblast differentiation-associated protein AHNAK	6	12	5	High	6	628.7	0	119.4	146.6	178.1	212.4	63.1	77.9	346.7	331.1	444.4	407.8	157.1	181.3	242.6	184.9	269.2	205.2	102.7	54.3	170.1	149.2	145.6	170.7	44.1	43.2
Q14651	Plastin-1	6	16	22	High	9	70.2	0	58.8	51.6	146.2	167.4	48.4	54.8	141.7	150.1	417.3	416.7	133.4	138.3	113.4	58.8	321.5	300.7	66.4	33.3	61.8	71	224	270.2	27.8	33.5
O60610-1	Protein diaphanous homolog 1	6	8	6	High	6	141.3	0	14.1	21.1	108.5	148.9	6.4	14.3	42.5	30.4	347.9	355.8	36	30.7	36.2	38.8	371.8	334.4	31.9	27.8	28.1	24.6	251.9	297.3	23.6	32.4
Q15084-1	Protein disulfide-isomerase A6	6	20	20	High	6	48.1	0	290.3	372	426.4	504	126.7	177.4	330.4	284.7	484.4	449.1	179.2	169.4	361.8	450.9	528.1	640.9	224.3	294.4	263.9	346.4	358.8	449.5	160.4	176.2
P13489	Ribonuclease inhibitor	6	18	20	High	6	49.9	0	51	59.5	84.9	83.7	41.6	47.7	176.1	180.8	314.4	297.6	127.4	133.3	140.4	154.7	236.8	238.6	99.5	117.4	122.2	122.2	185.4	217.6	97.6	88.9
P22102-1	trifunctional purine biosynthetic protein adenosine-3	6	13	8	High	6	107.7	0	23	32.7	68.4	82.6	58.7	74.9	97.6	94.9	257.4	259.9	235	215.4	94.3	82.9	211.2	237.4	211.4	222.2	64.5	75.4	180.5	224.3	164.7	191.5
Q8WVY7	Ubiquitin-like domain-containing CTD phosphatase 1	6	12	32	High	6	36.8	0	16.1	8.5	47.5	62.9	29	28.1	125.4	97.2	244.6	243.8	293.3	257.8	92.6	112.5	237.8	248.5	259.9	272.6	103.7	104	213.6	229.9	250.1	273.3
P23396-1	40S ribosomal protein S3	5	10	21	High	5	26.7	0	114.7	141.6	204.9	231.7	111.4	132.6	309.6	291.3	433.3	389.2	296.4	288.4	268.7	260.7	325.2	343.4	256.1	219.3	160.6	167.2	239.4	256.1	150.9	172.6
P05388	60S acidic ribosomal protein P0	5	18	19	High	5	34.3	0	158.4	181.4	167.6	195.1	88.6	105.9	391.8	381.6	429	412.3	250.6	234.1	377.9	358.7	413.9	397.6	217.8	223.6	258.4	287.4	307.8	329.1	151.1	171.5
P36578	60S ribosomal protein L4	5	11	14	High	5	47.7	0	59.2	64	106	126.1	57.8	66.7	147.5	147.5	252.4	226.3	142.7	154.8	126.6	115	218.4	203.5	96.5	87.9	91.8	105.5	145	158.9	64.3	74.1
P62424	60S ribosomal protein L7a	5	10	23	High	5	30	0	5.4	4.4	92.3	105.5	18.8	18.8	27.1	25.9	168	161.4	75.2	86.6	17.8	15.8	115.3	112.8	59.3	51.6	16.8	18.9	93.2	99.1	49.1	72.2
O15144	Actin-related protein 2/3 complex subunit 2	5	22	29	High	5	34.3	0	162.5	173.1	372.2	389	195.6	199.8	595	753.8	1418.5	1756.8	744.4	979.3	207.9	105.6	489.3	279.9	243.5	308.8	103.1	139.2	239.4	312.2	240.4	188.8
P59998	Actin-related protein 2/3 complex subunit 4	5	18	34	High	5	19.7	0	200	193	266.2	249.8	192.9	172.8	563.4	728.4	771.2	944.4	540.9	641	212.9	132.5	277.3	180.9	190.8	138.5	122.4	149.1	167.2	207.1	125	136.8
P05141	ADP/ATP translocase 2	5	26	29	High	8	32.8	0	275.9	241.5	319.1	341.7	298.8	325.4	489.4	454.3	521.6	479.4	538.8	477.5	226.5	266.1	289.6	374.4	301.8	378.1	199.1	254	256.8	338	299.5	324.8
O00203-1	AP-3 complex subunit beta-1	5	14	6	High	5	121.2	0	46.6	67.3	79.4	92.4	40.7	45.4	133.6	121.1	225.7	214.4	96.9	102.3	101.6	95.5	183.3	194.6	95.2	99.8	78.1	106.3	153.4	149.6	75	75.7
O60716-1	Catenin delta-1	5	9	6	High	5	108.1	0	7.7	10.4	106.6	127.2	44.3	43	31.7	32.8	276.1	241.5	144.2	115	31.3	46.4	203	203.5	115.3	121.4	30.8	35.2	145	181.5	84.3	93.5
A5YKK6	CCR4-NOT transcription complex subunit 1	5	9	3	High	5	266.8	0	23.5	29.6	66.3	72.5	7.3	9.7	123.7	114.6	214.8	215.1	43.6	37.4	175.3	182.4	144.8	158.9	76.9	71.4	126.5	132.7	140.8	141.5	51.3	47.9
Q7Z6Z7	E3 ubiquitin-protein ligase HUWE1	5	13	2	High	5	481.6	0	22.5	24.1	37.5	52.1	51.2	52	113.7	131.1	204.9	203.4	278	253.9	128.3	131.7	207.8	269.9	268.2	316.7	97.3	113	153.6	186.8	201.9	238.6
Q14152	Eukaryotic translation initiation factor 3 subunit A	5	11	4	High	5	166.5	0	35.5	35.5	120.3	124.4	36.2	31.9	117.2	117.4	302.9	301.7	87.5	77.2	103.5	100.8	270.9	278	82.1	73.1	84.3	88.7	222.3	257.5	56.4	74.8
P52272	Heterogeneous nuclear ribonucleoprotein M	5	15	7	High	5	77.5	0	49.7	59.4	217.1	223.7	64.4	74.1	129.7	124.6	351.4	369.7	144.5	154.9	92.9	88.9	255.6	262.2	106.4	106.4	53.7	66.6	210.6	202	74.6	83
O95373	Importin-7	5	9	10	High	5	119.4	0	21.5	23.1	21.4	20.5	12	17	102.8	97.3	64.9	74.2	58.3	57.5	120.5	90.4	66.6	73.4	53.7	59.7	56.6	95.9	58.6	73.4	53.3	55.1
P22234	multifunctional protein ADE2	5	16	15	High	5	47	0	78.6	113.1	76.1	111.5	70.2	85.2	344.1	302.7	325	296.3	263.1	253.1	357	362.4	337.5	319.3	285.8	279.6	240.4	283	228.3	270.8	187.1	188.9
Q96SB3	Neurabin-2	5	17	9	High	5	89.1	0	169.5	171	300.3	302.3	138.4	139.3	507	566.9	851	869.8	417	459	193.3	139.1	293.8	186.8	185.4	148.3	109.9	125.7	134.2	147.1	116.8	127.2
Q08752	peptidyl-prolyl cis-trans isomerase D	5	8	15	High	5	40.7	0	25.5	38.9	72.5	100.6	15.7	12.8	105.1	102.9	308.2	308.2	65.7	59.4	94.6	102.9	306.5	299.1	42.5	43	72.4	87.1	240.1	274.9	42.9	46.4
Q15365	Poly(RC)-binding protein 1	5	15	28	High	6	37.5	0	73.7	92.9	150.7	183.9	76.7	81.8	140.4	120.8	387.9	383.5	125.2	111.5	106.7	122.8	355	343.2	93.6	104.6	77	88.3	238.2	270.4	90.3	100.9
Q9H3U1	Protein unc-45 homolog A	5	15	10	High	5	103	0	12.4	16.7	35.2	56.5	41.4	57.9	78.8	77.3	170.7	163	161.1	172.2	92.4	79.1	171.1	170	161.9	148.1	63.7	79.7	122.3	152.2	113.1	135.6
Q9Y230	RuvB-like 2	5	22	14	High	5	51.1	0	86.9	100.6	145.6	165.9	97.8	110.7	476.3	462.8	756.8	729.5	512.2	553.3	226.3	221	425.2	477.7	267.9	275.4	160.5	192.1	333.7	344.9	189.1	206.3
P30153	serine/threonine-protein phosphatase 2A 65 kDa regulatory subunit A alpha isoform	5	24	22	High	8	65.3	0	53.1	56.7	67.3	94.1	46.5	75.7	237.8	224.1	318.9	312.7	266.6	253	218.7	215.3	330.6	314.5	218.3	233.9	177.4	179.3	239.9	301.6	160.2	194.6
P62136-1	serine/threonine-protein phosphatase PP1-alpha catalytic subunit	5	51	48	High	12	37.5	0	486.9	519.8	480.5	534.1	531.7	562.8	1568.3	1857.7	1691.4	2058.5	1813.2	2150.1	662.9	419	736.4	477.2	749.7	410.4	288	365.5	358.1	429.4	337.8	436.9
Q9NYL9	tropomodulin-3	5	17	26	High	5	39.6	0	80.4	129.7	140.8	140.9	172.2	198.7	270.6	392.9	359.9	409.4	443.5	531.9	100.2	83	161.5	115.9	202.5	150	69.8	92.6	86.1	128.2	117.6	137.9
Q9BTW9	Tubulin-specific chaperone D	5	14	8	High	5	132.5	0	21.4	26.5	38.1	54.3	9.9	24.3	106.4	115.8	218.4	222	90.9	83.4	100	103.7	223.3	219.1	76.3	80.6	74.5	96.3	177.5	217.1	61.1	83.7
O43795	Unconventional myosin-Ib	5	9	7	High	5	131.9	0	41.3	62.6	42.1	62.6	18.9	17.7	165.1	175.3	154.1	161.9	45.1	49.5	163.9	184.4	153.6	141.5	48.5	42.3	131.3	145.9	110.3	140	32.8	38.4
Q96QK1	Vacuolar protein sorting-associated protein 35	5	11	10	High	5	91.6	0	21.6	26	21.2	33.1	17.3	27.9	85.1	79.6	90.1	98.7	80.3	83.3	70.8	85.1	92	101.1	76.9	99.1	64.7	81.3	87.5	106.2	78	74
P62277	40S ribosomal protein S13	4	10	27	High	4	17.2	0	89	106.6	126.3	154.1	108.1	119	224.3	227.2	287.6	301.7	253.5	248.8	178.8	153.6	212.6	194.6	198.5	179.1	117	133.4	118.9	136.1	124.7	145.1
P62701	40S ribosomal protein S4, X isoform	4	10	13	High	4	29.6	0	10.2	9.9	175.9	209.6	85.7	113.5	29.7	35	427.3	393.9	206	196.9	15.8	15.4	320.6	297.8	145.4	141.1	14.5	6.9	209.6	223.9	93	91.5
P46781	40S ribosomal protein S9	4	9	16	High	4	22.6	0	134.2	160.3	106.4	129.2	86.8	102.5	307.7	269.5	295.8	278.8	192.1	187.8	256.9	239.9	329	307.5	179	153.4	185.1	202.3	197.2	217.3	114.6	125
P61313-1	60S ribosomal protein L15	4	9	21	High	4	24.1	0	28.7	33.9	107.2	125	61.6	74.3	91.5	94.3	274.9	242.7	171.5	155.7	86.4	93.6	228.9	209.3	157.8	154.9	69.3	80.2	154.7	174	121.9	151.6
Q07020	60S ribosomal protein L18	4	11	25	High	4	21.6	0	85.8	108.7	69.6	84.5	88.3	95.2	151.5	131.9	173.3	138.3	163.8	137.7	118.1	114.9	130.2	112.7	135.4	131.6	91.7	90.2	83.4	84.3	100	114
P32969	60S ribosomal protein L9	4	6	36	High	4	21.9	0	13.8	23.1	11.9	11	36.7	51.8	52.7	53.9	27.4	39.3	105	103.2	28.6	43.7	32.8	36.3	110.7	95.9	34.5	26	26.4	22.3	78.6	80.7
P61160-1	Actin-related protein 2	4	13	21	High	4	44.7	0	13.4	16.6	89.2	96.4	60.3	61.1	42.8	39.7	293.5	356.8	233.1	280.6	17.2	17.1	137	129.6	122.3	110.8	11.6	13.9	88.1	112.2	75.8	80.7
O15143	Actin-related protein 2/3 complex subunit 1B	4	11	17	High	5	40.9	0	162.2	140.4	149.8	135.6	198.1	170.9	448.6	527.8	417.7	512.2	558.6	714.2	159.4	122.1	173.2	135	214	115.8	88.8	96.7	88.6	115	88.5	129.3
P30520	adenylosuccinate synthetase isozyme 2	4	7	14	High	4	50.1	0			28.6	36.5	13.1	23.1			94.7	96.6	53	57.3			90.2	94.9	53.4	48.8			70.7	82.2	44.8	46
Q9ULA0	Aspartyl aminopeptidase	4	11	16	High	4	52.4	0	45	86.1	289.8	407.6	172.1	274	43.2	46.1	229.2	213	145	117.5	85.3	79.5	371.9	417.7	222.1	256	40.8	53.1	214.1	257.1	118.9	150
P25705-1	ATP synthase subunit alpha, mitochondrial	4	7	8	High	4	59.7	0	2.1	6.1	43.6	46.6	16.3	15.8	11.6	9.5	124.6	116.7	37.1	39.4	9.4	10.4	111.1	153.3	27.3	44.8	12	10.6	94	117.2	28	39.4
O00299	chloride intracellular channel protein 1	4	6	29	High	4	26.9	0	19.5	17.7	36.2	42.2	54.4	59.3	38	47.8	97.4	97.6	137.1	146	45.8	30.5	79.9	44.8	129.8	86	20.1	28.2	33	41.7	51.8	70.9
O95071	E3 ubiquitin-protein ligase UBR5	4	8	2	High	4	309.2	0	17.3	18.6	46.9	61.9	10.2	17.6	86.7	73.4	198.7	188.1	110.2	97	72	84.3	194.1	207.4	81.9	101.7	79.6	87	186.6	190.6	100.2	126.5
P63241-1	Eukaryotic translation initiation factor 5A-1	4	13	31	High	4	16.8	0	27.5	42.6	131.6	167.9	70.7	94.9	112.6	105.8	342.4	293.1	230.6	209.7	91.1	92.3	236.1	267.4	143.2	149.8	69.7	70.6	156.7	201.7	125.1	135.5
Q9HAV4	exportin-5	4	7	4	High	4	136.2	0	20.3	22.9	37.1	47.6	55.6	63.6	75	72.4	222.5	215.1	229.9	214.8	77.4	89.9	241.7	292	201.7	228.2	68.9	71.4	176.1	227	163.4	178.4
P52907	F-actin-capping protein subunit alpha-1	4	16	29	High	5	32.9	0	116.7	119.6	125.3	125.7	64.3	54.8	322.9	381.9	301.6	335.7	162.5	177.8	157.6	71.6	151.3	98	87.5	62.5	58.2	73	83.2	99.9	46.2	48.4
P47755	F-actin-capping protein subunit alpha-2	4	11	27	High	5	32.9	0	65.4	62.5	136.4	132.4	80.4	89.8	169.7	183.5	328.1	342.6	224.3	240.2	86.8	59.6	156.6	92.6	88.8	69.3	52.9	55.6	76.4	103.1	54.1	55.6
Q14315	Filamin-C	4	21	4	High	9	290.8	0	13.2	16	27.3	33	77.5	101	48.5	61.7	89.1	109.1	300.5	345	43.2	37.1	68.4	64.1	181.3	135.9	47.9	53.5	51.4	57.6	160	200
P08754	Guanine nucleotide-binding protein G(k) subunit alpha	4	19	27	High	6	40.5	0	52.2	60.2	100.7	118.5	129.8	167.2	114.5	129.2	233.5	274	298.9	382.6	54.6	36.7	126.3	114.4	120.1	111.3	45.8	74.4	112.1	126.7	121.8	167.6
P04792	Heat shock protein beta-1	4	8	25	High	4	22.8	0	74.2	82.4	57.1	86.5	29.5	39	120.8	118.5	149.3	127.8	55.1	54.5	113.5	89.9	141.5	139.6	47.9	51.6	61.9	64.4	100	106	37	39
P61978	Heterogeneous nuclear ribonucleoprotein K	4	8	11	High	4	50.9	0	130.5	158.3	88.9	114.1	31.6	44.2	167.9	179.6	162.6	174.7	62.5	62.5	151.3	141	146.7	136.4	56.3	45.5	92.6	141.6	110.1	144	33.3	50.2
Q5QNW6-1	Histone H2B type 2-F	4	13	21	High	4	13.9	0	300.6	307.8	224.5	238.7	277.8	322.5	488.9	915.2	410.6	769.7	501.8	1012.7	106.3	106.8	119.8	79.6	123.6	116.2	105.4	111.9	77.4	92.8	97.8	116.9
Q14573	Inositol 1,4,5-trisphosphate receptor type 3	4	6	3	High	4	303.9	0	25	22.1	12.6	16.8	25.2	29.9	66.7	112.9	51.4	46	92.4	120.2	35.1	42.5	35.2	34.7	64.5	95.2	31.2	40.7	24.7	32.6	66.4	64.6
P33176	Kinesin-1 heavy chain	4	6	6	High	4	109.6	0			33.4	43.3	57.7	56.4			127.4	118.4	95	100.2			155.5	145.9	77.4	71.7			102.5	109	58	73.1
O43813	LanC-like protein 1	4	13	16	High	4	45.3	0	217.9	203.9	205.6	186.6	214.1	189.4	202.4	211.6	248	298.7	191.7	175	190.2	222.2	238.9	299.2	164.2	221.8	158.9	214.4	192.8	282.8	144.5	203.4
Q9UBX3	Mitochondrial dicarboxylate carrier	4	6	23	High	4	31.3	0	4.1	7.9	2.9	5.9	42.1	43.1	19.5	21.1	17.2	13.5	71.3	79.8	12.4	20.3	14.1	16	58.1	62.3	8.7	13.6	19.2	15.1	44.8	53.9
Q8IVT2	Mitotic interactor and substrate of PLK1	4	7	7	High	4	75.3	0	98.9	150.5	166.7	190.5	75.4	100.3	249.6	243.6	307.5	293.7	141.6	145.2	98.3	63.1	125.4	115.3	65.3	43	47.4	57.5	96	100.4	37	35.9
P26038	Moesin	4	34	18	High	10	67.8	0	19.9	25.5	43.9	70.7	122.5	162.6	79.5	80.8	158.6	169.2	326.5	348.6	66.2	56.7	141.6	105.7	324.9	200.8	51.4	48.6	75.5	91.6	139	182.9
Q96HC4	PDZ and LIM domain protein 5	4	7	8	High	4	63.9	0	45.9	59.9	57.2	69.2	32.9	47.1	140.5	133.3	225.7	191.8	123.9	119.5	101.9	79.8	182.2	162.7	98.7	68.8	48.6	70.6	124.7	130.3	45.6	73.5
Q06830	peroxiredoxin-1	4	23	24	High	5	22.1	0	169.1	208.9	427	541	369.8	468.1	391.3	308.2	872.9	790.5	863.2	763.2	351.3	354.6	730.6	734.6	689.3	685.7	187.4	237.6	438.7	520.1	383.8	452.9
Q02809	Procollagen-lysine,2-oxoglutarate 5-dioxygenase 1	4	6	8	High	4	83.5	0	9.9	13.4	37.4	46	31.3	35	27	24.1	122.3	122.3	82.4	67.8	26.9	26.8	112	114	81.8	72.1	17.7	23.9	78.7	97.9	42.3	52.9
Q08209-1	Serine/threonine-protein phosphatase 2B catalytic subunit alpha isoform	4	10	10	High	4	58.7	0	48.7	68.9	148.8	184.3	82.3	107.4	163.4	196	433.1	494.8	240.7	254.5	70.6	52.4	186.9	111.3	111.9	71.3	35	46.8	99.3	119.9	66.5	54.1
P42224-1	Signal transducer and activator of transcription 1-alpha/beta	4	10	12	High	4	87.3	0	36.9	40.7	14	21.4	39.9	45.6	124.7	124.8	70.3	86.3	152.1	153.1	144.2	153.9	83.6	80.6	162.5	181.5	77.9	113.2	65.5	81	104.7	150.9
Q92673	Sortilin-related receptor	4	7	3	High	4	248.3	0	32.3	40.7	28.9	31.2	16.8	26.3	86.3	86.3	52.6	36.1	76.9	79.6	56.3	71.3	25.8	40.2	59.2	65.3	51.2	63.9	27.5	30.6	38.8	59.9
Q07157	Tight junction protein ZO-1	4	7	3	High	4	195.3	0	6.5	10.1	71.8	84.8	61.1	67.5	28.7	30	244.1	303.6	181.4	264.5	20.9	18.9	109.9	70.8	102.3	78.3	17.4	20.8	51.6	78.6	59.9	73.9
Q13263	Transcription intermediary factor 1-beta	4	8	5	High	4	88.5	0	31.8	29.4	49.1	58.5	7.4	9.5	121.5	131.6	214.8	211.7	34.7	33.6	86.6	100	143.1	164.2	26.7	32.5	68.9	76.2	123.9	126.6	22	23.3
Q92973-1	transportin-1	4	4	8	High	4	102.3	0			28.6	31.9					86.6	106.2					94.5	86.2					59.2	87
P07437	tubulin beta chain	4	75	55	High	17	49.6	0	947.6	1009.9	1471.1	1601.2	1245.7	1332.5	1259.7	1150.3	1837.9	1716.1	1584.6	1436.2	906.4	1036.7	1406.7	1468	1197.3	1258.9	808.8	893.7	1225.3	1356.3	1021.4	1156
P68371	Tubulin beta-4B chain	4	67	55	High	17	49.8	0	187.4	227.8	242.7	297.4	275.6	316.6	338.8	322.5	291.8	255.9	460.8	417.3	158.2	139.8	221	235.4	202.4	189.7	109.5	124.9	179.7	203.7	143.8	165.3
O75643-1	U5 small nuclear ribonucleoprotein 200 kDa helicase	4	7	3	High	4	244.4	0	28.9	34.8	14.6	18.9	3.5	7.9	86.8	91.9	53.7	53.4	21	27.4	130.5	111.2	38.2	47.6	16.1	9.9	88	87.7	30.2	49.6	11.5	13.5
P63104-1	14-3-3 protein zeta/delta	3	16	25	High	5	27.7	0	135.7	155.2	265.5	333.9	81.4	105.8	356.3	366.1	748.8	764	229.3	226.9	330.7	281.6	735.7	560.1	230.8	189.5	184	200.9	360.2	405.6	127.9	142.6
P46782	40S ribosomal protein S5	3	8	24	High	3	22.9	0	18	20.2	52.9	83.9	47.7	49.5	48.9	56.7	176.3	171.6	100.4	123	44.8	41.6	152.7	144.5	120.6	109.7	28.1	35	118.6	122	69.3	74.4
P62241	40S ribosomal protein S8	3	8	19	High	3	24.2	0	26.2	29.4	39.2	54.7	22.1	25.3	65.7	48.9	102.2	99	61.9	56.4	61.6	57.3	112.9	103.7	58.9	62.2	48.5	51.2	72	75.6	46	59.5
P05387	60S acidic ribosomal protein P2	3	10	41	High	3	11.7	0	53.5	69.8	94	114.3	97.6	118.6	156.5	133.8	227.4	202.1	218.9	194.5	124	127.4	191.1	193.8	172.2	160.3	75.2	96	122.7	151.4	105.4	142.3
Q02543	60S ribosomal protein L18a	3	9	16	High	3	20.7	0	82.8	95.2	113.8	148.1	110.8	107.6	214.4	223.2	277.7	282.4	293.7	282.1	197.6	167	215.1	193	229.3	203.2	121.7	154.5	140.5	191.5	165.1	188.2
P62829	60S ribosomal protein L23	3	7	27	High	3	14.9	0			231.2	288.4	114.9	123.4			453	398.8	214.1	186.6			215.4	198.5	110.5	96.7			161.6	194.7	80.8	84.5
P62750	60S ribosomal protein L23a	3	4	18	High	3	17.7	0	10.9	18.2	7	9.9	9.8	9.3	32.2	36.6	22.9	27	25.4	18.1	28.8	23.3	31.1	25.8	22.8	17.1	22	28.3	25.7	18.6	14.1	17.5
P63173	60s ribosomal protein l38	3	7	36	High	3	8.2	0	84.1	105.7	258.5	274.5	245.1	283.4	104.7	90.4	369.3	344.3	273.5	261.1	37	39.1	168.5	164.8	112.1	107.2	26.3	33.1	125	159.7	67.4	96.7
P23526-1	Adenosylhomocysteinase	3	6	9	High	3	47.7	0	41	54.2	41.5	43.6	74	85.3	132.6	120.6	102.2	98.2	235.9	220	131.1	123.9	94.2	100.9	187.6	217.4	87.9	86.2	62.5	85.3	137.9	163.5
P12236	ADP/ATP translocase 3	3	20	27	High	6	32.8	0	7.4	8.1	109.3	120	31.8	30	16.7	22.1	190.3	164.6	69.8	64.8	16.3	16.2	108.1	146.9	39.2	46.4	11.3	14.7	105.9	131.1	38.2	33.5
O14617-1	AP-3 complex subunit delta-1	3	6	4	High	3	130.1	0			24	35.9	6.5	6.6			84.2	89.1	40.5	48.4			77.5	88	56.7	65.5			59.8	81.9	46.1	51
P54136-1	arginine--tRNA ligase, cytoplasmic	3	7	7	High	3	75.3	0	13.8	14.9	27.9	44	18.9	25.1	46.3	45.5	139	124	66.2	60.7	66.3	66.3	161.4	198.1	97.5	119.5	76.1	63.1	196.6	145.1	121.6	93.5
Q12797	Aspartyl/Asparaginyl beta-hydroxylase	3	11	6	High	3	85.8	0	82.2	86.2	189	199.2	115.4	129.2	110.2	94.1	303.9	260.7	149.3	116.7	81.9	90.5	257	278.5	101.4	132.8	69.2	85.1	185.9	245.2	91.3	111.5
Q08211	Atp-dependent rna helicase a	3	5	5	High	3	140.9	0	3.7	7.2	18.3	13.6	11.9	10.4	11.5	18.7	49.7	53.3	44.2	48.4	13.4	15.3	36.4	48.8	27.9	30.1	15	18.4	38.4	50.6	28.1	35.9
O00148	ATP-dependent RNA helicase DDX39A	3	7	10	High	3	49.1	0	25	31.7	70.6	85.8	25.1	34.1	67.2	73.7	188.4	176.7	54.7	64.3	55.3	62	166	191.4	58	63.6	53.1	52.1	135.9	149.5	40.3	48
O00571	ATP-dependent RNA helicase DDX3X	3	10	7	High	3	73.2	0	60.6	65.6	159.7	183.2	67.4	75.8	95.6	83.3	277	267	114	116.9	78.2	68.7	261.1	228.9	103.6	105.7	63.4	73.7	217.7	238.3	99	107.6
P60953	Cell division control protein 42 homolog	3	11	30	High	3	21.2	0	47.6	46.4	69.4	95.2	74.7	86.6	148.2	173.2	273.3	327.5	279	333.1	87.7	74.9	158.5	107.2	137.4	112.1	59.7	75.2	97	124.7	89.6	88.1
P53618	Coatomer subunit beta	3	5	3	High	3	107.1	0	15.7	16.9	30.1	25.5	34.1	47.6	35	32.8	56	63.4	86.1	81.4	48.7	49.4	93.3	84.8	103.4	118.5	38.7	44.2	66.2	77.2	86.6	106.3
Q99829	Copine-1	3	8	11	High	3	59	0	19.6	31.4	15.1	18.6	9.3	9.8	64.1	50.8	42.5	40.1	27.9	37.2	52	49.2	36.7	34.1	25.9	24.4	37.3	43.1	30.3	43.3	19.2	28.4
Q7L576-1	cytoplasmic FMR1-interacting protein 1	3	5	4	High	3	145.1	0	12.3	17.9	11.6	9.6	11.5	7.1	63.5	52.3	36.2	39.3	36.8	41.8	58.6	49.3	30.9	27.4	43.6	37.2	87.8	45.9	22.1	26.3	24.5	38
Q16531	DNA damage-binding protein 1	3	4	3	High	3	126.9	0	20.4	26.4	70.3	123.6			76.4	77.1	196.3	176.1			87.2	96.3	111.1	125.9			65.5	96.2	106.9	114.9
Q9ULG1	DNA helicase ino80	3	4	2	High	3	176.6	0			36.1	33.8	12.6	16			215.2	225.4	163	175.1			81.7	82.8	51.4	63.4			65	84.4	59.8	60.8
P31689-1	DnaJ homolog subfamily A member 1	3	4	12	High	3	44.8	0	53.6	65.5			32.9	34.3	103.6	97.4			56.1	42.5	87.3	84.6			38.9	39.7	82	78.8			32.5	35.3
O60884	DnaJ homolog subfamily A member 2	3	10	18	High	3	45.7	0	44.2	54	110.7	145.9	57	69.8	74.9	68	194.9	216.4	90.8	94.6	49.7	60.6	153.9	157	67.9	74.5	62	60.9	143.5	198.2	60.4	89.4
P39656	Dolichyl-diphosphooligosaccharide--protein glycosyltransferase 48 kDa subunit	3	4	10	High	3	50.8	0			55.4	76	6	14.7			143.4	151	27.3	28			130.8	147.9	24.7	32			113.8	143.2	24.1	34.1
Q969X5	Endoplasmic reticulum-Golgi intermediate compartment protein 1	3	8	14	High	3	32.6	0	96.4	108.2	176	206.9	225.7	274.1	112.4	96.9	232.8	183.2	263.4	229.5	59.4	91.5	114.4	163	154.7	199.6	49.7	76.8	109.2	132.1	118.5	173
P60842	Eukaryotic initiation factor 4A-I	3	9	11	High	3	46.1	0	24.4	26.7	31.4	55.5	22.9	44.2	80.2	71.7	121.2	103.9	88.5	79.1	70.1	79.2	105.7	113.9	77.6	79.2	46.7	70.1	104.6	115.7	84.9	103.2
Q9UK99	F-box only protein 3	3	5	7	High	3	54.5	0	55.6	42	176.5	161.2	146.2	102.8	42.7	34.5	232.3	203.1	125.1	117.3	26.9	36.7	117.5	109.2	80.1	89	29.1	23	93.4	104.3	64	79.3
P04406-1	glyceraldehyde-3-phosphate dehydrogenase	3	6	11	High	3	36	0	6.7	9.4	48.7	65.8	4	4.1	17.5	16.2	121.9	111	10.5	12.7	17.8	20.7	143.8	174.7	14.8	14.7	13.4	14.8	85	116.2	9.1	9.5
P62873	Guanine nucleotide-binding protein G(I)/G(S)/G(T) subunit beta-1	3	11	11	High	3	37.4	0	162.9	171.8	228.2	244.1	260.2	287	253.6	290.4	377.6	428.9	395.1	504.9	113.9	86	138.6	100.6	133.7	99.1	64	93.4	125.5	150	89.9	145.9
P0DMV8	heat shock 70 kDa protein 1A	3	22	18	High	9	70	0	67.4	82.3	51.4	53.6	68.8	85.2	229.5	225.4	159.3	140.2	164.8	155.1	185.4	210.4	112.4	115.3	122.9	114.3	132.7	158	87.6	111.2	85.6	100.2
P22626	heterogeneous nuclear ribonucleoproteins A2/B1	3	7	12	High	3	37.4	0	48.7	56.9	45.7	56.4	68.9	84.4	100.7	92.1	63.3	58.6	84.5	94.4	62.1	77.5	35.9	43.4	48.4	46.4	61.7	71.3	31.5	36.5	47.1	43.7
P16402	Histone H1.3	3	7	14	High	3	22.3	0	30	38.1	104.2	139	90.5	117.5	68.2	68.9	229.3	240.4	190.2	197.9	31.6	29.3	124.2	121.8	115	110.5	22.5	21.8	90.5	85.6	79.1	80.4
P62805	histone H4	3	11	29	High	3	11.4	0	133.9	144.5	215	245.3	228.8	281.4	282.8	547.5	429.2	852.9	483.5	911	42.3	24.6	81.1	55.9	78.2	61.2	25.7	43.1	62.2	86.7	87.3	101.4
P52292	Importin subunit alpha-1	3	4	12	High	3	57.8	0	28.2	36.6	7.8	6.3	45.9	55.3	112	86.8	19.9	21	134.5	106.3	98.2	103.8	20.6	20.7	109.1	116.4	85.9	96.2	16.2	21.5	99.1	103.8
Q27J81	Inverted formin-2	3	6	4	High	3	135.5	0	15.8	17.5	9.6	9.5	12.6	18	51.7	62.8	43.1	39	49	49.7	57.7	56.8	44.1	45.4	49.6	60.4	48.7	64.7	34.3	36.5	40.2	48.7
Q13620-1	Isoform 2 of Cullin-4B	3	4	4	High	3	102.2	0	19.8	26.8	5.4	3.6	12.7	12.7	85.3	73.4	17.7	17.9	62.9	45	83.6	106.1	19.4	20.7	58.9	70.3	62	78.8	14.4	16.4	35.8	44.3
Q9Y2Z0-2	Isoform 2 of Protein SGT1 homolog	3	4	14	High	3	37.8	0	7.9	12.4	28.3	41.5			32.1	34.9	90.9	75.6			31.5	29.5	70.3	85.5			25	25.1	59.7	60.5
Q14145	Kelch-like ECH-associated protein 1	3	6	9	High	3	69.6	0	89.3	92.6	78.7	63.9	12.5	12.7	122.6	114.5	111.8	131.1	31.1	24.2	76.5	93.2	66	82	21.8	31.4	62.7	66.7	47.8	61.9	21	25.7
P02533	Keratin, type I cytoskeletal 14	3	36	26	High	12	51.5	0	306.6	576.2	881.8	1914.7	508.1	1117.2	354.9	261.7	964.4	672.1	591.1	430.1	200.5	205.3	418.6	391.2	289.8	269	169	163.8	335.8	393.4	234.7	244.5
P00338-1	L-lactate dehydrogenase A chain	3	4	11	High	3	36.7	0	13.1	28.2	48	70.5	49.5	70.7	56.4	76.3	127.2	121.2	150.7	150.2	80.9	82.1	165.1	166.2	164.4	168.6	43.4	56.2	95.7	103.9	95.3	116.5
Q9NZR2	Low-density lipoprotein receptor-related protein 1B	3	6	1	High	3	515.2	0	13	14.8	21.9	31.4	13.8	19.8	46.8	45.9	81.4	89.3	49.7	53.2	36.3	41	62.8	59.2	21.8	23.1	35.2	39.9	41.3	63.7	18.8	31.7
Q15046	Lysine--tRNA ligase	3	9	5	High	3	68	0	14.4	22.3	49.2	55.5	78.1	89.3	54.5	54.3	149	142.2	271.8	262.7	50.6	56.5	142.3	148.4	251	260.9	42.6	48.2	114.7	118.6	189.7	220.6
Q9UPN3	Microtubule-actin cross-linking factor 1, isoforms 1/2/3/5	3	7	1	High	4	837.8	0	2.4	4.6	6.1	5.6	7.5	11.4	23.7	22	51.5	57.5	44.2	83.9	13.7	8.3	16.7	12.5	28	16.7	9.4	10.3	13.4	16.4	13.9	19.6
Q9NUJ1	Mycophenolic acid acyl-glucuronide esterase, mitochondrial	3	6	14	High	3	33.9	0	22.6	24	4	5.4	4.9	8.4	56.2	52	16.4	21.3	22.5	22.9	56.9	69.2	27.6	25.5	32.9	34.6	52.5	48.1	24.1	32.3	30.7	35.4
Q9UM47	Neurogenic locus notch homolog protein 3	3	8	3	High	4	243.5	0	8.6	7.5	89.7	112	138.8	180.5	12.4	12.4	121.2	126.2	190.2	175	11.8	13.9	89.9	85.7	110.1	118.6	10.7	10.6	59.4	96.1	97.6	123.9
P19338	Nucleolin	3	5	8	High	3	76.6	0	31.2	56.4	41.5	68.1	43.7	70.1	36.7	50.6	53.4	74.7	76.1	89.6	25.1	21.1	41.6	48.3	64.9	78.1	19.7	24.6	35.2	34.6	64.2	71.6
P32119	Peroxiredoxin-2	3	11	19	High	4	21.9	0	45.8	52.6	43.8	54.7	36.2	47.8	103.7	86.1	110.1	91.9	90.5	70.8	122	113.1	112.8	126.1	87.6	104.6	50.3	59.3	45.5	67.3	44.5	55.1
P30041	Peroxiredoxin-6	3	4	14	High	3	25	0			50	63.8	63.4	73.7			105.6	113.8	117	131.1			85.5	85.9	99.5	86.4			65.1	78.5	52.4	66.2
Q9Y263	Phospholipase A-2-activating protein	3	8	7	High	3	87.1	0	14.6	21.6	20.3	14.3	30.7	45.7	36.9	43.7	87.1	90.2	86.9	95.9	46.2	41.4	91.2	115.3	97.1	91.3	28.8	40	86.3	95.5	65.6	89.6
Q9Y2S7	Polymerase delta-interacting protein 2	3	6	10	High	3	42	0	54.3	54.3	106.6	119.1	23.3	32.9	76.4	66.2	128	134.8	39.7	36.6	99.7	92.2	266.4	156.1	62.5	41.4	65.7	78.6	119	134.4	30.6	29.1
P26599	Polypyrimidine tract-binding protein 1	3	7	12	High	3	57.2	0	11.2	9.9	11.4	9.1	26.2	38.3	25.4	29.9	47.5	73.3	96.4	121	23	25.2	42.1	45.6	61.9	74.6	17.5	27.3	37.8	53.5	66.5	101.7
Q06323-1	Proteasome activator complex subunit 1	3	18	17	High	3	28.7	0	29	17.9	53.8	58.9	27.7	38.4	122.7	121.2	200.7	207.7	175.8	164.6	209.7	249.4	274.7	321.8	309	375.7	138.3	159.6	171.1	218.5	215.7	259.4
Q9UL46	proteasome activator complex subunit 2	3	14	21	High	3	27.4	0	17.4	24.3	26.5	21.1	11.4	10.4	80.5	92.1	94.4	106.8	65.8	77.6	152.3	192.8	152.4	166.1	118.1	134.1	91.2	115.4	116.7	136.4	81.6	91
P61289-1	Proteasome activator complex subunit 3	3	7	15	High	3	29.5	0	31.9	23.9	23.1	26	20.8	23.3	73.3	72.7	51.8	47.3	73	67.3	91.7	110.8	44.2	49.2	99.3	131.2	68.1	93.3	37.7	34.7	68.8	104.8
Q99873	protein arginine N-methyltransferase 1	3	7	10	High	3	41.5	0	43.5	52.1	27.7	30.6	23.1	27.2	124.2	99.4	60.9	56.4	96.5	90.9	110.9	112	45.4	59.2	65.5	65.7	75.9	83.6	39	42.6	59.1	65.5
P07237	Protein disulfide-isomerase	3	9	8	High	3	57.1	0	131.4	161.3	450.8	592.7	234.5	283.6	177	150.5	623.6	510.7	283.6	225.8	118	161.4	458.9	541.9	202.5	264.9	96.3	153.1	333	518.6	139.4	245.1
Q9Y219-1	Protein jagged-2	3	7	4	High	3	133.3	0	55.1	57.1	24	27.8	14.8	16.9	111.9	118	89.1	82.9	44.7	49.5	73.8	79.2	50.4	55.8	32.9	28	66.2	89.3	57.3	74.6	29.2	33.8
P35241-1	radixin	3	32	17	High	10	68.5	0	64.6	93.6	8.8	11.3	26.2	35.4	173.5	173	19.1	21.2	70.5	70.5	152.8	104.2	24.2	13.6	73.1	55.7	100.6	108.2	12.5	17.9	45.8	52.9
P43487	Ran-specific GTPase-activating protein	3	9	22	High	3	23.3	0	78.9	107.8	88.3	117.6	38.4	43.1	282.5	229.4	220.9	199.4	145.7	119.7	280.7	280	208.6	197.5	163.2	157.9	152.8	193	108	167.7	87.5	105.9
P62140	Serine/threonine-protein phosphatase PP1-beta catalytic subunit	3	35	43	High	10	37.2	0	15.8	22.7	59.5	66.1			52.9	54.4	148.5	183.8			38.8	41	109.8	76.6			32.8	41.3	75.2	79.8
A0MZ66	Shootin-1	3	3	5	High	3	71.6	0			44.4	56.7					136.9	137.8					116	84.2					70	75.6
P52788-1	Spermine synthase	3	7	17	High	3	41.2	0	35.2	58.7	20	21.2	11.4	12.8	46.1	38.6	61.5	71.5	42.4	42.3	73.2	68.7	59.2	67.5	26.9	31	31.2	48	57.4	61.3	32.3	29.9
P28290	Sperm-specific antigen 2	3	10	4	High	3	138.3	0	31.2	29	86.8	86.7	42.9	48.2	75.1	88.6	210.1	279.7	118.8	174.4	38.3	43.1	114.3	96.6	61.4	55	29.5	32.4	69.2	73.6	43	51.7
P63208	s-phase kinase-associated protein 1	3	14	31	High	3	18.6	0	158.6	194.9	294.6	371.6	132.4	164.1	209.3	218.6	456.2	496.1	212.1	211.4	86	100.4	229.7	256.3	133.5	118.5	156.7	177.3	310.5	393.6	131.7	171.7
Q14247-1	Src substrate cortactin	3	10	6	High	3	61.5	0	92.2	83.4	206	221.8	97.7	109.1	226.4	270.1	573.8	583.6	245.7	255.7	68.8	42.1	220.2	173	71.3	48.6	34.8	42.7	136.2	176.1	39.2	58.1
P31948	stress-induced-phosphoprotein 1	3	8	6	High	3	62.6	0	26.8	35.5	99.2	131.2	79.8	119.8	59.4	67.1	284	232.4	184.1	157.8	59.4	58.9	293.3	288.2	185.5	161.7	42.4	53.8	209.1	242.7	114.1	178.5
Q13148-1	TAR DNA-binding protein 43	3	7	14	High	3	44.7	0	19.5	15.4	64.8	79.3	34.6	28.8	43	49.7	277.2	287.8	116.5	131	30.9	32.4	233.9	230.7	98.5	104.4	20.1	33	182.2	211.6	66.3	87.2
Q8NBS9-1	Thioredoxin domain-containing protein 5	3	4	9	High	3	47.6	0	36.6	54.9	88.6	120.9	41.6	44.7	44.9	44.7	86	83.1	40.8	38.2	48.9	74.4	70.7	115.4	51.9	52.9	39.1	50.7	90.3	90.6	37.6	54
P57088	Transmembrane protein 33	3	4	13	High	3	28	0	11.9	8.6	6.3	9.8	21.3	29.8	28.5	29.1	24.9	23.1	51.7	46.1	27.7	27.6	27	29.7	46.8	47	26.9	24.7	15.5	26.3	47.3	34.2
P68366	Tubulin alpha-4A chain	3	66	41	High	13	49.9	0	189	222.1	374.7	451.4	315	374.4	328.5	292.8	636.1	588.6	554.6	507.9	242	261.9	478.8	529.6	415.9	454.5	199.6	246.2	439.4	472.5	361	416.6
O95407	Tumor necrosis factor receptor superfamily member 6B	3	10	15	High	3	32.7	0	66	72	119.1	121.7	65.5	68.7	85.2	69.9	168.9	166.7	87.7	73.6	115.9	148.1	181.7	196.4	98.3	121.9	64.4	83.6	107.6	125.5	55.1	68.4
Q9UMX0-1	Ubiquilin-1	3	9	8	High	3	62.5	0	71.7	72.2	24.1	24.1	9.6	15.2	89.1	88.9	42.5	41.5	24.2	19.8	141.5	151.7	39.9	44.7	19.7	25.2	104.7	116	29	28.5	14.9	15.7
Q9NZ01-1	Very-long-chain enoyl-CoA reductase	3	8	10	High	3	36	0	10	8.2	109.4	129.1	69.7	80.3	23.3	25.3	255.6	225.7	119.5	101.6	16.4	15.4	219.5	199.2	122.9	91	12.7	12.8	164.5	156.2	92.5	72.8
Q9P0J1	[Pyruvate dehydrogenase [acetyl-transferring]]-phosphatase 1, mitochondrial	2	4	8	High	2	61	0	6.1	4.9	7.7	10	9.2	8.8	24.5	20.6	30.5	41.6	36.7	45.2	25.9	30.5	28.8	23.5	37.9	41.6	17.8	21.8	20.2	37.7	30.9	45.9
P62258-1	14-3-3 protein epsilon	2	13	19	High	4	29.2	0	28.4	38.7	43.6	58.9	33.6	39.5	92.1	92.6	146.8	159.4	75.5	80.5	80.3	68	150	143.8	82.1	70.5	46.7	62.2	82.7	102.8	57.2	53
P27348	14-3-3 protein theta	2	8	20	High	4	27.7	0	6.1	5.1	4.3	8.8			34.2	36.1	14.1	15.8			30.5	27	21.5	21.9			33.3	26.4	18	17.5
Q02218	2-oxoglutarate dehydrogenase, mitochondrial	2	2	2	High	2	115.9	0			48.7	55.9					91.8	78.6					89.6	77.6					64.8	66.5
P25398	40S ribosomal protein S12	2	4	18	High	2	14.5	0			181.5	220.7	27.9	35.6			343.2	329.1	62.2	65.7			285.5	246	48.2	49			188.3	210.4	35.4	39.1
P62249	40S ribosomal protein S16	2	5	15	High	2	16.4	0	64.2	72.5	16.4	31.7	28	32.1	142.1	138.5	40.1	39.9	66.7	77.1	130.1	127	33.6	38	57.4	60.3	86.4	93.6	26.6	29.5	40.3	49
P62269	40S ribosomal protein S18	2	5	11	High	2	17.7	0	10.7	18	13.9	24.2	43.3	38.2	54.1	47.1	59.5	59.6	109.3	103.2	36.4	48.1	43.6	54.9	96.7	126.8	27.1	30.7	29.1	37.6	114	151.8
P60866	40S ribosomal protein S20	2	5	19	High	2	13.4	0	32	42.2	16.2	15.6	25.4	33.5	78.4	65.9	31.7	28.3	59.6	47	77.2	64.1	28.8	21.4	42.3	53	48.4	40.2	21.5	22.8	39.7	31.5
P62266	40S ribosomal protein S23	2	7	27	High	2	15.8	0	43.6	45.8	73.3	97.9	7.3	5.5	98.4	103.9	185.1	204.1	19.2	24.5	41.6	33.6	105.5	98.7	9.8	13.7	25.4	39.6	74.2	94.6	10.2	10.6
P61247	40S ribosomal protein S3a	2	5	9	High	2	29.9	0	9.8	10.6	75.5	110	7.4	8	19.1	14	178.6	199.9	18.7	26.6	18.7	15.2	162	144.1	19.9	17.5	11.2	15.3	104.5	131.8	16.7	13.8
P62081	40S ribosomal protein S7	2	5	12	High	2	22.1	0	42	21.5	39.3	42.5	43.9	41.5	36.3	33.2	86.8	96.5	70.4	75.3	29.2	30.2	104.9	97.2	72.2	58.4	22.5	23.4	71.7	84.8	53.2	64.7
P21589-1	5'-nucleotidase	2	3	7	High	2	63.3	0			12.6	15.3	17.4	25.6			35.8	39.7	33.1	37.8			20.5	23.5	28	19.4			18	14.4	15.8	22.5
P62906	60S ribosomal protein L10A	2	6	11	High	2	24.8	0	32.1	50.6	49.9	64.3	56.6	65.3	90.6	84.3	148	152.4	140.1	138	74.7	60.7	108	114.1	129.2	114.8	58.8	71.5	106.4	135	105.2	114.5
P26373-1	60S ribosomal protein L13	2	3	9	High	2	24.2	0	29.9	49	30	39.5	25	25.2	87.3	82.6	60.2	43.5	59.4	47.1	90.7	70.7	48.9	30.9	52	48	53.1	64.2	24.1	24.1	38.9	31
P40429	60S ribosomal protein L13a	2	2	9	High	2	23.6	0					65.2	77.9					122.5	105.8					97.9	85.6					59.3	69.5
P83731	60S ribosomal protein L24	2	4	11	High	2	17.8	0	25	26.2	53.3	51.6	19.3	30.6	63.6	61.2	111.5	101.1	50	49.8	54.9	64	74.3	71.4	35.9	34.4	58.9	43.2	53.5	62.6	28.7	35
P46776	60S ribosomal protein L27a	2	5	14	High	2	16.6	0	12.9	12.1	33.5	48.9	36.8	43	34.9	32.1	99	97.4	95.7	93.5	22.4	25.2	70.7	76.3	90	91.3	18.2	18	77.9	80.5	88.8	68.7
P46777	60S ribosomal protein L5	2	2	9	High	2	34.3	0			30.4	41.3					61.9	64.2					47.2	49.6					32.5	39.8
Q02878	60S ribosomal protein L6	2	8	11	High	2	32.7	0	35.3	43.4	22.3	24.8	22.8	29	99.5	97.5	50	56.2	63	58.8	77.5	82.7	77.5	78.9	53.4	49.5	58.4	81.7	39.9	46.7	27.5	54
P18124	60S ribosomal protein L7	2	4	10	High	2	29.2	0	15.6	16.7	47.6	46.7	10.2	13.1	50.4	44.4	103.7	114.7	32.1	33.8	27.9	30	103.1	111.9	24.4	23.8	21.1	25.6	84.7	92.4	17.7	21.3
P62917	60S ribosomal protein L8	2	6	12	High	2	28	0	30	38.2			33.5	32.5	57.1	53.7			54.6	44.9	44.7	40.8			44.8	42	37.7	36.3			33.1	27.9
P52209	6-phosphogluconate dehydrogenase, decarboxylating	2	4	6	High	2	53.1	0	17.2	20.4	7	10.1	4.9	9.6	61.9	56.9	21.3	28.3	17.6	15	58.6	55.6	18.7	21.7	20.4	18	48.6	45.4	19.3	17.7	16.3	20.5
O15145	Actin-related protein 2/3 complex subunit 3	2	7	11	High	2	20.5	0	29	33.8	123.2	112.3	43.5	43.8	163.7	225.7	433	541.6	170.5	211.1	78.5	79.9	153.7	120.8	70.5	62.7	44.9	42.7	73.5	100	49.6	65.3
Q9H9F9	actin-related protein 5	2	5	8	High	2	68.3	0			7.8	7.6			28.2	38.5	69.4	77.6			7.5	9.7	37.5	43.1			12.6	15.2	34.3	35.6
Q9UJY4	ADP-ribosylation factor-binding protein GGA2	2	3	6	High	2	67.1	0	5.8	9.9	4.6	9.1	6.6	5	132.7	89.3	21	24.3	77.7	61.8	168.1	226.1	22.3	10.1	104.4	160.2	141.7	149.1	14.6	15.6	103.9	103.2
Q92572	AP-3 complex subunit sigma-1	2	2	11	High	2	21.7	0			72	90.1	27.4	34.6			92.7	58.1	49.3	43.6			54.8	47.6	43.4	41			32.9	33.4	21.9	27.7
P14868	Aspartate--tRNA ligase, cytoplasmic	2	4	5	High	2	57.1	0	16.8	21.2	126.3	420.3	21.5	19.2	62.7	54	207.2	174.2	59.5	58.2	48.8	58.7	156	270.4	50.9	40.7	34.6	37.8	149.2	165.7	41	31.4
P53396-1	ATP-citrate synthase	2	4	3	High	2	120.8	0			107.5	114	18.3	16.9			210.5	187.3	87.5	110.7			232.9	212.8	65.7	65			211.5	197.3	67.7	62.9
Q6PJG6-1	BRCA1-associated ATM activator 1	2	3	4	High	2	88.1	0					8.9	12.4					27.1	26.5					25.1	27.8					18.6	27.6
Q9Y6D5	Brefeldin A-inhibited guanine nucleotide-exchange protein 2	2	3	2	High	2	201.9	0	14.4	17.7	4.2	5.8			38.4	36.4	17.6	19.1			31.4	37.7	9.6	16.9			33.7	45.6	13.8	19.5
P12830	Cadherin-1	2	5	4	High	2	97.4	0	39.6	62.7	56	98.2	7.7	5.4	112	112.4	142.3	154.2	24.5	23.5	77.5	52.4	91.8	76.3	17.3	16.1	65.4	40.3	75.1	72.3	14.7	16.9
P63098	Calcineurin subunit B type 1	2	8	19	High	2	19.3	0	31.6	30.1	76.9	78.6	48.8	67.1	102.6	118.4	253.2	290.2	174.9	196.5	63.9	64.7	133.2	98.1	101.5	91	45.7	53	76.5	96.6	69.3	80.6
Q9HB71	Calcyclin-binding protein	2	2	7	High	2	26.2	0			52	62.1					175.9	158.7					155.4	145.1					104.7	123.1
P62158	Calmodulin	2	5	22	High	2	16.8	0	32.1	37.9	121.3	128.8	45.4	60.6	233.2	225.9	619.1	623.2	171.9	138.8	20.7	19.3	133.3	104	68.3	50.3	13.9	19.6	70.6	89.3	38.1	44
Q9NPF0	CD320 antigen	2	5	7	High	2	29	0	99	99.7	52.3	55.1	143.3	130.3	162.1	141.7	77.9	67	238.3	224.4	70.5	76.9	36	43.9	114.1	142.2	63.9	65.4	21.1	34.6	119.6	133.7
Q9UBF2	Coatomer subunit gamma-2	2	3	3	High	2	97.6	0					21.8	27					62.7	71.6					67.2	71.5					65.8	89.8
Q15021	condensin complex subunit 1	2	7	2	High	2	157.1	0	12.9	13.8	30.8	25.5	31.8	39.4	50	53.3	164.8	176.8	183.4	192.6	48.6	46.7	108.8	127.9	123.7	156.8	43.3	65.4	115.6	169.7	126.1	185.4
Q86VP6-1	cullin-associated nedd8-dissociated protein 1	2	8	3	High	2	136.3	0	15.9	15.7	41.4	48.6	34.5	41.6	71.7	60.8	143.6	150.8	105.7	101.1	75.2	73.8	186.4	159.9	115.7	113.1	52	59.4	121.4	160.7	92.3	97.3
O00483	Cytochrome c oxidase subunit NDUFA4	2	6	27	High	2	9.4	0	77	83.6	97.9	112.3	50.3	44.4	137.4	116.4	173.2	170.6	73.8	56.7	100.8	96.2	131.3	150.9	55.7	59.3	66.2	84	104.2	126.1	48.5	47.4
Q14008	Cytoskeleton-associated protein 5	2	3	2	High	2	225.4	0	25.7	30.4	24.9	27.1			87.7	97.3	68.6	47.6			73.8	72.6	53.7	53.7			61.7	65.6	39.9	37.3
P33993-1	DNA replication licensing factor MCM7	2	3	4	High	2	81.3	0	25	26.4			9.6	12.4	75.6	76.1			50.2	51.5	67.4	76.6			43.3	49	60.8	85.9			37.2	37.2
Q96EY1-1	DnaJ homolog subfamily A member 3, mitochondrial	2	3	5	High	2	52.5	0			23.2	25.9					56.5	56.6					45.2	46.3					43.1	46.7
Q9UBS4	DnaJ homolog subfamily B member 11	2	2	7	High	2	40.5	0			40.6	63.9	81	88			97.6	87.2	113.3	82.4			60.4	65.2	61.8	74.3			65.7	89	53.8	60
P04844-1	Dolichyl-diphosphooligosaccharide--protein glycosyltransferase subunit 2	2	5	7	High	2	69.2	0	13.7	20.7	20.9	27.1	18.8	26.3	70.5	51.3	59.7	66.8	60.1	65.7	53.5	51.1	56.4	74.2	48.7	53.6	50.1	45.3	59.4	65	47.5	53.6
Q14258	E3 ubiquitin/ISG15 ligase TRIM25	2	6	4	High	2	70.9	0	53.4	57	38.9	52.6	11.4	13.1	179	185.6	133.3	139.8	41.2	44.2	154.3	129.4	107.1	87.6	35.2	38.1	91.9	120.1	68.4	76.1	23.7	27.9
Q12929	Epidermal growth factor receptor kinase substrate 8	2	5	5	High	2	91.8	0	26.2	33	12.4	14.3	22.8	21.3	83.2	96.5	40.8	47	93.9	127.3	67.1	33.3	42.1	29.7	86.7	44.4	32.3	45.1	26.8	33	40.4	62.9
P16422	Epithelial cell adhesion molecule	2	2	8	High	2	34.9	0	46.4	37.3	15.7	10.9			70.9	98.7	47.4	45.7			31.6	31.2	27.7	36.5			26	33.7	32.2	31.6
Q96RT1	Erbin	2	2	2	High	2	158.2	0			64.3	73					143.1	201.1					97.1	82.2					69	70.4
P38919	Eukaryotic initiation factor 4A-III	2	2	8	High	2	46.8	0	19.1	21.2			5.2	5	51.1	58.9			14.9	20.1	45.2	51.3			13.6	15.5	36.3	27.4			12.6	15.3
P41091	eukaryotic translation initiation factor 2 subunit 3	2	3	4	High	2	51.1	0	20.8	21.7	16.2	20.3	19	22.7	54.3	53.3	47.5	50.7	81.9	64.2	47	49.5	55.1	63.5	57.3	65	39.5	45	49.5	49.8	49	52.4
B5ME19	eukaryotic translation initiation factor 3 subunit C-like protein	2	4	3	High	2	105.4	0	27.5	42.5	9.8	18.8	10.8	14.9	137.3	131.7	48	33.3	66	60.6	139.4	131	34.2	37.3	57.1	48.5	114.2	127	28.2	40.5	48.3	55.7
P60228	Eukaryotic translation initiation factor 3 subunit E	2	4	5	High	2	52.2	0	15.2	14.7	26.4	35.5	18.5	24.3	28.5	35.1	92.7	104.4	67.8	63.1	34.9	25.3	97.5	96.9	57.3	56.5	17.2	66.5	78.5	96.4	44.1	51.6
Q13347	Eukaryotic translation initiation factor 3 subunit I	2	6	8	High	2	36.5	0	15.7	20.8	8.4	13	8.3	8.4	67.5	66.2	45.7	44.5	20.3	29.1	62	73.1	30.8	35.4	29.6	23.4	50	68.1	30.3	39.9	29.4	29.9
Q9Y262	eukaryotic translation initiation factor 3 subunit L	2	3	7	High	2	66.7	0			10.1	18.2	16.2	21.6			33.9	37.7	41.4	35.1			34.8	40.1	48.7	45.1			28.7	37.4	41.4	45.1
P78344-1	Eukaryotic translation initiation factor 4 gamma 2	2	6	2	High	2	102.3	0	14.6	16.5	22.9	32.2	26.6	29	56.3	55	75.2	84.1	95.5	88.3	56.1	59.7	121.9	105.5	105.5	94.7	40.3	51	82.1	93.6	65.6	66.4
O60841	Eukaryotic translation initiation factor 5B	2	5	3	High	2	138.7	0	6.9	11.7	22.8	28.8	6.8	12.5	54	52.7	98.3	112.4	40.9	44.1	49.7	65.5	91.2	131.7	46.5	53.3	69.7	65.2	86.8	117.6	56.8	54.7
O43592	Exportin-T	2	6	4	High	2	109.9	0	2.9	2.8	11.8	11.6	4.3	7.8	16.4	14.9	36.1	41.3	15.7	16.1	9.2	6.2	34.7	36.3	22.5	18.6	10.1	12.6	28.1	40.5	15.1	17.4
Q9BSJ8	Extended synaptotagmin-1	2	2	4	High	2	122.8	0					8.5	8.5					23.1	24.3					17.9	22.6					18.8	29.1
Q96CS3	FAS-associated factor 2	2	4	9	High	2	52.6	0	9.6	12.3			15.2	19.4	40	38.3			54.6	70.7	42.7	63.5			89.2	106.7	47.1	52.8			78.9	101.1
P51114-1	Fragile X mental retardation syndrome-related protein 1	2	3	5	High	2	69.7	0	12.1	18.4	33.3	39			60.9	64.2	105.8	86.2			71.7	62	75.8	79.8			55.6	64.9	50.1	61.9
Q8TEQ6	gem-associated protein 5	2	7	2	High	2	168.5	0	24	23.1	24.9	25.7	10.4	9.1	106.1	111.1	133	139.6	77.5	76.8	69.1	82.9	110	103.1	62.4	58.3	55.6	85.9	78.8	92.8	41.2	59.9
Q06210-1	glutamine--fructose-6-phosphate aminotransferase [isomerizing] 1	2	3	4	High	2	78.8	0	14.3	18.2	20.7	22.5	10.6	13.5	47.9	44.3	61.2	57.3	28.8	26.2	44.2	41.6	52.3	50.1	30.5	21.8	40.9	46.5	40	46.7	24	30.7
P41250	Glycine--tRNA ligase	2	3	4	High	2	83.1	0	6.9	9.6			11.3	12.3	27	29.1			30.8	22.4	23.5	27.8			24.9	27.1	20.8	21.9			20.2	29.3
P62826	GTP-binding nuclear protein RAN	2	7	15	High	2	24.4	0	18.5	23.5	19.9	19.5	29	35.1	84.4	72.9	73.2	67	100.9	95.5	85.2	89.5	69.1	88.7	107.5	135.3	52	61.2	53.4	60.4	77.1	86.8
P63096-1	Guanine nucleotide-binding protein G(i) subunit alpha-1	2	20	25	High	6	40.3	0			79	97.5	27.7	43.5			150	207.3	56.2	76.3			79.8	79.3	26.5	29.3			62.1	91	19.5	28.8
P04899-1	guanine nucleotide-binding protein G(i) subunit alpha-2	2	22	22	High	6	40.4	0	297.3	380.1	860.1	1044.9	607.2	750.3	713	898.4	1788.5	2135.3	1292.1	1592.5	197.6	161.1	543.1	459	412.4	334.6	234	294.5	501.1	651.9	364.7	511.8
Q9Y450-1	HBS1-like protein	2	6	4	High	2	75.4	0	30.2	29.3	51.9	58.2	40.7	52.5	104.5	110.5	167.3	174.6	131.7	132	85.7	89	151.6	152.9	112.4	104	82.5	79.9	130.9	140.7	96.4	115.2
P52597	Heterogeneous nuclear ribonucleoprotein F	2	11	13	High	4	45.6	0	68.8	79.9			78.9	68.6	88.2	88.5			104.6	106.7	61.9	58.4			72.7	81.2	43.3	41.2			68.2	65.5
P31943	Heterogeneous nuclear ribonucleoprotein H	2	13	11	High	4	49.2	0	89.4	93.3	90.2	101.3	91.6	89.4	157.5	148.2	169.3	176.7	180.3	163.3	108.6	108.9	129.2	131.9	133.5	129.4	78	80.5	99.4	107	93	98
Q86YZ3	Hornerin	2	2	3	High	2	282.2	0	59.4	56.3			35.6	17.2	469.1	131.5			135.6	39.2	88.1	96.1			86.5	20.9	83.4	58.9			17.5	22.9
O60684	Importin subunit alpha-7	2	6	8	High	2	60	0	19.8	27.8	9.4	16.5	4.7	12.1	77.9	86.9	62.8	71.1	26.9	23.1	94	89.4	53.6	63.1	26.8	35.6	70.6	97	50.1	71	21.3	28.4
Q96P70	Importin-9	2	7	5	High	2	115.9	0	2.5		5.1	4.9	10.1	11.6	14.7	17.9	17.1	19.3	36	37.3	13.7	13.7	14.4	13.2	58.8	55.7	12.3	13.9	11.4	15	27.4	34.3
Q12905	Interleukin enhancer-binding factor 2	2	3	9	High	2	43	0	4.3	3.8			10.3	12.7	13.3	13.7			36.4	51.9	7.6	15.2			28.7	29.8	11.4	12.5			28.3	38.6
Q9Y5L0-1	Isoform 1 of Transportin-3	2	2	4	High	2	107.9	0					4.3	4					21.8	20.1					15.3	26.3					10.3	18.5
Q9H857-2	Isoform 2 of 5'-nucleotidase domain-containing protein 2	2	2	8	High	2	64.1	0	20.7	16.8			4.3	1.9	41.4	40.1			17.4	20.4	29.5	41			10.9	11.3	27.4	21.6			12.9	13.5
Q92841-1	Isoform 2 of Probable ATP-dependent RNA helicase DDX17	2	2	4	High	2	72.3	0					67.7	81.3					112.1	98.6					80.7	74.5					66.2	75.8
Q93008-1	Isoform 2 of Probable ubiquitin carboxyl-terminal hydrolase FAF-X	2	5	1	High	2	290.3	0	32.6	34	13	17.5	8	11.7	144	137.4	70.5	66.6	46	51.8	208	221.1	75.3	56.4	49.1	43.6	98.1	172.5	42.4	64.1	42	47.4
P06753-2	Isoform 2 of Tropomyosin alpha-3 chain	2	8	13	High	3	29	0	89.2	122.4	124.7	167.1	80.7	110.3	251.6	272.3	388.2	379.1	234.3	250.1	187.4	89	249.2	162.3	156.7	104.6	43.9	63.4	102.3	119.8	68.3	64.3
Q03405-2	Isoform 2 of Urokinase plasminogen activator surface receptor	2	3	11	High	2	31.2	0			11.8	18.1	61.9	59.1			33.8	27.6	102	91.9			25.5	26.8	81.6	87.6			14.7	26.6	56.2	74.7
Q12792-3	Isoform 3 of Twinfilin-1	2	3	12	High	2	41	0	17.3	28			17.2	28.1	68.7	63.6			66.1	60.8	53.7	48.9			57	43.1	37.4	42.6			30.4	44.7
P08779	Keratin, type I cytoskeletal 16	2	24	22	High	10	51.2	0			123.3	334.5	71	196.7			132.5	102.4	86.3	85.4			75.7	75.8	62.1	63.7			67.2	79.3	48.1	51.1
Q04695	Keratin, type I cytoskeletal 17	2	26	22	High	9	48.1	0	8	18.3	15.6	62.4	14.4	34.7	21.8	28.5	33.8	40.2	27	29.7	18.9	17.1	33.6	33.8	16.4	15.5	15.1	15.7	29.1	34	13.9	18.6
Q8N1N4	Keratin, type II cytoskeletal 78	2	4	6	High	3	56.8	0			116.4	166.1					198.2	180.1					174.8	171.8					127.3	133.3
P46379-1	Large proline-rich protein BAG6	2	3	2	High	2	119.3	0			26.7	26	16.7	18.5			87.9	85.3	55.4	47.3			70.9	75.8	41	38.7			45.9	49.4	26.9	29.2
Q14764	major vault protein	2	3	6	High	2	99.3	0			3.5	4.4	1.8	3.6			17.4	26.3	11.6	12.1			18.4	23.6	9.6	13.7			17.1	20.2	7.3	12.4
O15479	Melanoma-associated antigen B2	2	4	7	High	2	35.3	0	30.2	32.8	22.9	31.2	21.4	27.9	76.5	57.7	88	70.4	57.5	61.6	57	50.9	77.1	77.3	63.8	56.2	30.9	39.7	52.1	60.7	37	37
Q9H936	Mitochondrial glutamate carrier 1	2	3	11	High	2	34.4	0	21.1	27.7	68	79			35.3	30.4	113.1	114.8			24.6	28.5	85.9	81.9			19.6	19.8	61.9	81.7
Q96T76-1	MMS19 nucleotide excision repair protein homolog	2	4	3	High	2	113.2	0	14.4	16.4	4.9	6.7	4.8	4	75.7	67.7	13.9	18.7	17.1	14.4	73.5	66.1	19.2	15.3	25.8	18.2	72.4	62.6	21.6	16.3	14	14.1
P53985	Monocarboxylate transporter 1	2	2	9	High	2	53.9	0			9.6	5.4		3.3			18.6	21.5	13.1	13.2			15.9	17.8	11.7	14.1			14.8	14.8	9.3	13.7
P60660	Myosin light polypeptide 6	2	5	15	High	2	16.9	0	68.5	81.4	29.3	34.2	179.1	201.5	131.2	130.5	48.9	39.7	335.2	319.1	44.1	31.3	20.1	25.6	134.7	78.2	14.7	33.4	26.2	18.1	73	80.8
Q9NX02	NACHT, LRR and PYD domains-containing protein 2	2	2	3	High	2	120.4	0			9.8	8.2	11.8	9.5			39.8	48.2	45.3	42.9			51.3	53.1	26.6	34			42.2	47.9	26.4	25.7
Q9BXJ9	N-alpha-acetyltransferase 15, NatA auxiliary subunit	2	3	4	High	2	101.2	0	11.9	14	51.6	65.9			36.6	41	125.6	106.9			35.9	29	110.3	106.3			22.4	26.4	93.3	93.5
P46531	Neurogenic locus notch homolog protein 1	2	4	2	High	3	272.3	0	63	69	12.5	22	9.6	12.4	57.6	59.2	51.4	50.2	56.4	45.3	32.6	32.3	27.3	32.8	23	37.2	22.9	33.6	22.6	37.4	21.9	36.3
Q14697-1	Neutral alpha-glucosidase AB	2	2	4	High	2	106.8	0					26.2	34.7					75.3	78.9					59.8	78.7					64.3	64.2
Q6P4R8-1	nuclear factor related to kappa-B-binding protein	2	3	3	High	2	138.9	0			19.2	19.7	3.9	4.4			168	176.3	91.9	121.8			65.9	76.7	23.3	37.4			57	53.6	23.3	30.2
P62937	peptidyl-prolyl cis-trans isomerase A	2	7	11	High	2	18	0	172.2	242.4	165.9	261.4	102.2	155.2	208.6	186.5	221.4	186.8	131.5	114.3	184.7	180.6	190.3	180.3	117.4	111.1	119.7	168.8	107.5	141.2	66.9	80.8
P23284	peptidyl-prolyl cis-trans isomerase B	2	3	10	High	2	23.7	0	53.5	71.1			57.2	81.6	99.4	91.1			86.5	80.2	89.1	114			95.6	107	65.1	92.1			76	92.3
Q02790	Peptidyl-prolyl cis-trans isomerase FKBP4	2	2	10	High	2	51.8	0			5.3	10.5	7.6	9.4			27.9	26.5	37.9	35.3			30.3	33.1	26.3	36			18.9	27.8	27.9	41.6
O15254	Peroxisomal acyl-coenzyme A oxidase 3	2	2	3	High	2	77.6	0	33.4	44.3	26.3	29.7			48.3	47.9	47	58.2			44.9	47.6	64.4	50.6			31.6	44.8	44.1	48.6
Q00325-1	Phosphate carrier protein, mitochondrial	2	4	6	High	2	40.1	0	51.9	57.5	34.1	46.3	39.5	52.1	105.3	136.7	74.2	60.5	85.8	86.6	87.6	93	32.4	41	53.7	65.8	60.1	97.6	29.1	37.2	53.8	63.6
P00558	phosphoglycerate kinase 1	2	3	8	High	2	44.6	0	4.1	4.4			11.3	10.8	14.5	11.1			56.3	65	11.8	12.2			58.3	50.2	6.1	9.8			25.4	33.9
P13796	Plastin-2	2	18	11	High	5	70.2	0	26.3	21.7	23.6	23.5	11.8	18	99.5	116.2	124.8	162.5	66.3	86.6	53.9	34.3	73.2	49	31.2	15.8	18.6	36.4	35.6	45.9	11.8	16.3
A1L390	Pleckstrin homology domain-containing family G member 3	2	4	4	High	2	134.3	0	6.6	5.5	16.4	19			37.8	51.5	74.4	89.6			9.6	2.3	27.7	16.8			2.4	5.7	14.2	21.1
P26196	Probable ATP-dependent RNA helicase DDX6	2	4	7	High	2	54.4	0	6.8	11.2	18.4	23.5	14.5	14.8	24	30	62.1	67.3	58.7	58.5	42.1	25.8	57.1	52.9	39.3	45.1	14.5	23.2	48.1	54.2	51.5	45.1
Q5GLZ8-1	Probable E3 ubiquitin-protein ligase HERC4	2	2	3	High	2	118.5	0			8.6	8.7	10.5	16.4			37.8	41.7	42.2	46.8			39	51.8	49.9	54.7			31.4	38.4	24.6	37.1
O60568	Procollagen-lysine,2-oxoglutarate 5-dioxygenase 3	2	4	4	High	2	84.7	0	6	3.9	8.7	7.7	11.3	15.5	8.9	16.6	18.6	23.4	41.1	37.5	12.9	10.4	24.1	21.2	36.6	32.8	12.4	15.1	16.9	24	23.1	29.6
P28065	Proteasome subunit beta type-9	2	5	9	High	2	23.3	0	6.8	10.3			27.1	44.6	47.9	39.6			106.4	88.1	51.7	62.9			112.1	131.7	28	35.5			74.6	74.1
Q14156-1	protein EFR3 homolog A	2	2	5	High	2	92.9	0					21.3	32					82.4	91.1					84.1	91.9					124.5	99.6
O60502	protein O-GlcNAcase	2	5	3	High	2	102.8	0	32.6	43.2	8.5	13.9	11.5	24.2	103.1	96.9	47.4	45.6	45.3	48.9	104.6	116.7	50.4	57.4	58.5	83	70.4	75.5	29.2	33.8	38.4	35.4
Q96FQ6	Protein S100-A16	2	7	29	High	2	11.8	0	45.3	62.3	54.2	63.9	75.4	107.1	75.3	82.3	96.5	128.9	131.5	155.3	43.6	44.2	46.6	48.3	48.8	47.3	33.5	32.5	47.2	62.8	49.7	60
P06703	protein S100-A6	2	5	31	High	2	10.2	0			12.6	18.8	8.1	15.2			69.2	70.7	52.2	57.9			72.4	80.3	48.2	67.2			70.4	120.9	59.3	89.5
Q14160	protein scribble homolog	2	2	2	High	2	174.8	0	7.7	10	20.3	26.7			30.5	33.1	55	51.9			25	34.1	46.2	38.9			29.4	32.1	29.6	35.1
Q14517	Protocadherin Fat 1	2	3	1	High	2	506	0			23.1	28.8	7.1	8.5			60.4	61.3	21.5	18.4			37.1	42	15	19.7			30.9	43.7	12	16.5
P27694	Replication protein A 70 kDa DNA-binding subunit	2	2	5	High	2	68.1	0	8.6	10.2			25.1	30.6	19.6	27.9			70.9	73.1	26.4	20.5			66.2	77.3	15.6	16.7			58.6	63.9
Q14257	Reticulocalbin-2	2	3	12	High	2	36.9	0			46.1	37.5	9.7	8.3			82.9	80.3	20.9	22			72.1	83.9	20	25.1			52	73.7	14.4	13.1
Q8NFJ5	Retinoic acid-induced protein 3	2	5	6	High	2	40.2	0			110	111.3	70.9	65.3			203.5	204.4	113.3	98.9			136.2	128.3	62.5	44.8			106.9	99.9	41.7	37.3
P11908	ribose-phosphate pyrophosphokinase 2	2	2	8	High	2	34.7	0	3.2	2.9			8.5	8.5	14.2	15.7			32.7	24	24.9	25			26.6	30.8	15.2	20.4			20.9	21.4
P16615	Sarcoplasmic/endoplasmic reticulum calcium ATPase 2	2	6	4	High	2	114.7	0	23.9	35.4	14.3	29.7	27.7	41.7	70.4	60.6	59.8	60	93.9	74.9	64	81	45.7	67.2	86	105	52.5	63.8	33	44.5	63	90.7
Q9UHD8-1	Septin-9	2	2	5	High	2	65.4	0	18.9	20.4			37.7	38.9	35.3	46.7			78.3	75.1	41.7	28.4			59.8	53.1	26.5	26.8			46.6	45
P62714	serine/threonine-protein phosphatase 2A catalytic subunit beta isoform	2	4	8	High	2	35.6	0	17.1	17.9	7.9	12.8	40.8	46.9	48.4	41.8	32.9	23.9	108.9	107.1	35.6	45.3	24.6	26.4	91.3	89.8	27.5	30.6	20.6	20.8	64.7	84.8
Q96FS4	signal-induced proliferation-associated protein 1	2	5	4	High	2	112.1	0	4.1	3.9	16.2	17.3	11	16.6	15.3	19.3	56	67.8	26.4	32.1	7.3	8.4	48.5	48.2	23.2	27.8	5.8	14.7	31.8	44	20.8	28.4
O75533-1	splicing factor 3B subunit 1	2	2	3	High	2	145.7	0					4.2	11.7					16.5	18.1					15.6	19.7					18.2	19
Q7KZF4	staphylococcal nuclease domain-containing protein 1	2	3	3	High	2	101.9	0	5.3	12.9			16.4	18	18	16.2			37	39.4	8.1	20.9			36.8	31.6	14.4	11.9			28.8	38.9
Q9UEW8	STE20/SPS1-related proline-alanine-rich protein kinase	2	2	4	High	2	59.4	0			38	31.1					45.2	48.8					63.6	63.7					51	61.1
Q8TC07-1	TBC1 domain family member 15	2	3	3	High	2	79.4	0			9.8	7.5	17.3	21			31	27.2	69.5	75.6			31.7	33.7	81.6	83.5			23.9	31.5	66.6	79.1
O43156	TELO2-interacting protein 1 homolog	2	3	3	High	2	122	0			18.6	28.9	12	13.6			109.9	122.7	60.4	56			84.5	93.4	30.1	27.4			82	91.9	43.6	51
Q9BUF5	Tubulin beta-6 chain	2	25	17	High	7	49.8	0	14.6	21.8	66.1	73	31	35.3	40.6	38.6	99.2	90.2	44.9	36.8	28.7	32.6	93.9	100	40.3	50.4	22.1	36.1	70.3	71.7	30.3	32.5
P17706-1	Tyrosine-protein phosphatase non-receptor type 2	2	3	5	High	2	48.4	0	4	9.4			9.3	11.5	33	29			45.8	48.5	28.7	39.5			63	77.6	29.8	28.8			53.3	57.5
Q9Y4E8	ubiquitin carboxyl-terminal hydrolase 15	2	3	2	High	2	112.3	0			26.4	30	2.6	3.9			105	104.2	25.2	23.2			122.9	129.8	36	35.1			103	107.2	33.5	32.6
Q70CQ2	Ubiquitin carboxyl-terminal hydrolase 34	2	3	1	High	2	404	0			10.9	10.4	5.8	6			51.7	58.9	18	28.9			30.6	38.1	14.2	14.9			34.6	43.7	14.7	15.1
P45974-1	Ubiquitin carboxyl-terminal hydrolase 5	2	6	3	High	2	95.7	0	19.9	24	10.3	13.7	21.7	24.3	76.8	108.6	50.8	60.1	86.9	85.6	100.5	105.4	60.8	63.1	95.8	119.7	56.5	76.8	33	45.4	72.2	81.6
O95155	Ubiquitin conjugation factor E4 B	2	2	2	High	2	146.1	0			5.1	5.8					27.5	24.7					20.8	20.7					22.7	26.7
P68036	Ubiquitin-conjugating enzyme E2 L3	2	6	31	High	2	17.9	0			39	44.2	32.9	36.5			46.6	39.7	39.5	45.1			39.7	38	35.5	27.9			35.3	38.8	32	39.1
P46939	Utrophin	2	2	1	High	2	394.2	0					8.3	9					27.5	30.6					28.6	18.9					24.8	23.3
P54725-1	UV excision repair protein RAD23 homolog A	2	4	12	High	3	39.6	0			8.6	9.2	3.8	7.8			45	41.2	18.8	20			39	58.6	19.2	19.9			44.2	57.2	21.5	19.3
Q8TDZ2	[F-actin]-monooxygenase MICAL1	1	4	2	High	1	117.8	0	6.2	5.8	7.3	10.3			21.9	22.9	30.6	36.7			23.2	22.2	35.8	37.9			21.1	20.9	32.2	42.8
P54922	[Protein ADP-ribosylarginine] hydrolase	1	3	3	High	1	39.5	0			160.1	165.4	67.5	62			181.6	161.2	73.5	72.6			138.5	146.1	69.9	77.6			93.3	142.6	38	59.3
P61604	10 kDa heat shock protein, mitochondrial	1	1	12	High	1	10.9	0			13.6	13					30.5	28.5					22	31.5					23.3	28.3
Q15029	116 kDa U5 small nuclear ribonucleoprotein component	1	3	3	High	2	109.4	0			11.9	12.7					51.2	40.6					38.9	40.3					34.4	41.4
P31946	14-3-3 protein beta/alpha	1	7	15	High	3	28.1	0					7.2	14.1					41.1	51.2					47.1	34.3					30.7	35
P61981	14-3-3 protein gamma	1	9	15	High	3	28.3	0	6.8	10	10.8	17.1	7.5	14.7	42.2	60.2	70.9	89.2	61.4	76.3	24.8	16.7	42.4	36.2	36.4	30.7	15.6	26.9	36	41.6	22.5	30.8
P46783	40S ribosomal protein S10	1	6	5	High	1	18.9	0	99.3	92.3	95.9	109.6	124.9	164.6	214.8	214.4	213.2	222.1	299.3	313.1	212.9	178.7	217	182.7	297.5	248.8	120.8	169.1	127.5	168.5	170.6	241.4
P62263	40S ribosomal protein S14	1	1	7	High	1	16.3	0
P62841	40S ribosomal protein S15	1	3	15	High	1	17	0	2.4	2.6	14.8	16.9			12.6	13.2	27.6	31.1			9.9	10.9	43.5	34.4			8.7	9.4	37.8	35.3
P62244	40S ribosomal protein S15a	1	3	6	High	1	14.8	0	42.9	40.8	82.3	83.2	37.1	38.3	99.4	87.8	150.8	133.4	85	81.7	70.3	76.9	114	86.8	71.7	59.9	48.2	53.2	68.3	80.2	42.5	43.4
P39019	40S ribosomal protein S19	1	1	5	High	1	16.1	0
P62847-1	40S ribosomal protein S24	1	3	9	High	1	15.4	0	15	16.1	15.2	18.5	23.7	27.4	45	56.1	33	31.1	71.3	83.8	52.1	55.3	34.8	29.8	59.9	59.2	40.2	52.5	19.4	22.9	50.3	57.9
P62851	40S ribosomal protein S25	1	1	7	High	1	13.7	0			32.4	60.7					80	105.2					198.3	81.8					53.8	48.4
P62854	40S ribosomal protein S26	1	1	8	High	1	13	0	14	19					30.9	37.1					26.9	21.1					16.8	19.5
P62857	40S ribosomal protein S28	1	3	17	High	1	7.8	0	6.6	11.7	17.7	30.9	25.8	30.6	29	24.3	48.4	53.9	78.9	74.1	18	21.4	29	33.3	39.9	49.5	11.2	15.6	25	29.7	34.9	41.7
P62861	40S ribosomal protein S30	1	4	17	High	1	6.6	0	78.1	98.3			73.4	97.1	206.7	234.8			186.8	177.5	111.9	111.8			113.7	86.4	83.2	79.5			64.1	81.1
P62753	40S RIBOSOMAL PROTEIN S6	1	4	7	High	1	28.7	0	10.3	11.5	31.1	40.5	39.2	47.3	24.3	24.2	59.3	68.3	88.9	97.8	20.5	21.9	67.1	49.4	90.2	82.2	18.2	18.5	46.4	56.8	68.7	84.1
P08195	4F2 cell-surface antigen heavy chain	1	1	2	High	1	68	0					7.8	11.5					27.3	26.2					20.5	25.8					16.7	23.6
P54619-1	5'-AMP-activated protein kinase subunit gamma-1	1	2	6	High	1	37.6	0			7.6	11.1					31.9	31					31.1	45.2					26.1	29.3
P05386	60S acidic ribosomal protein P1	1	4	14	High	1	11.5	0	16.3	12.1	68	82.2	18	26	33.9	29	109.1	104.9	35.3	29	32.7	24	91	76.2	31	30.6	23	21.3	59.9	77.4	18.1	25.2
Q96D46	60S ribosomal export protein NMD3	1	1	2	High	1	57.6	0	7.2	7.6					22.1	25.8					22.3	20					21.9	21.1
P62913	60S ribosomal protein L11	1	3	5	High	1	20.2	0	23.4	22.2	25.5	35.5	16.8	21	54.3	53.6	62.9	46.8	50.4	46.9	128.1	141	94.5	105.2	95.1	108	137.4	96.1	97.4	62.7	110	67.5
P30050-1	60S ribosomal protein L12	1	1	10	High	1	17.8	0			10.9	20.1					50.8	36.8					26.6	35					30.4	30
P50914	60S ribosomal protein L14	1	5	6	High	1	23.4	0	27.2	34	9.7	8.9	19.8	21.8	70.8	69.1	20.9	18.8	56.5	53.5	61.8	67.2	25.3	21.2	52.4	58	50.9	54.9	21.5	22.6	46.2	42.4
Q6P5R6	60S ribosomal protein L22-like 1	1	3	20	High	1	14.6	0	17	15.4	20.9	26.6	7.4	14.5	16.1	19	36.7	27.9	18.4	13.7	10.1	10.4	24.3	14.5	13.8	11.2	11.2	9.5	10.6	23.5	7.2	14.6
P62888	60S ribosomal protein L30	1	2	10	High	1	12.8	0	16	21	30.5	23.2			36.2	25.9	54.5	53.6			18.1	24.2	39	37.4			16.2	18.7	39.5	37.6
P49207	60S ribosomal protein L34	1	1	7	High	1	13.3	0	37	41.7					98.7	89.4					88.8	93.2					66.5	67
P61513	60S ribosomal protein L37a	1	1	20	High	1	10.3	0			15.7	22.4					33.8	33.4					19.6	20.5					20.7	20.1
Q9UBM7	7-dehydrocholesterol reductase	1	3	2	High	1	54.5	0	16.4	21.1	19.7	17.5	16.2	15.8	42.5	31.9	47.5	34.8	32.6	33.6	45.9	47.8	54.6	60	37.2	44.7	31.2	41	42.9	44.2	29.2	31.1
P24752	Acetyl-CoA acetyltransferase, mitochondrial	1	2	4	High	1	45.2	0			5.5	7.6					21.3	29.6					22.5	20.2					14.8	20.7
Q8N556-1	actin filament-associated protein 1	1	2	2	High	1	80.7	0			26.6	25	12.1	9.5			75	88.8	24.3	36.2			87.8	62.9	17.1	12.3			39.6	58.1	12.5	13.6
P68133	Actin, alpha skeletal muscle	1	82	31	High	11	42	0	136.4	83.4	199.9	174	254.3	166.8	99.6	180.9	195.5	310.8	227.9	367.8	178.5	47	238.2	73.1	360.6	131.8	53.5	50.7	72.2	86.1	115.4	116
Q92747	Actin-related protein 2/3 complex subunit 1A	1	6	11	High	2	41.5	0	20.7	23.7	9.5	9.8	12.4	15.8	79.9	104.7	38.7	53.6	44.6	65.8	37.4	37.1	25.8	24	27.6	21.1	33.9	39.3	19.7	29.5	19.9	24.1
Q9BPX5	actin-related protein 2/3 complex subunit 5-like protein	1	2	8	High	1	16.9	0	35	31.6			33.3	27.9	84.9	118.4			86.2	95.4	26.5	23.2			25.4	20.4	19	17.6			15.4	22.4
Q8N3C0	Activating signal cointegrator 1 complex subunit 3	1	1	1	High	1	251.3	0			18.2	20.2					34.5	36.1					28.7	29.5					23.1	31.9
O95433	activator of 90 kDa heat shock protein ATPase homolog 1	1	2	3	High	1	38.3	0			15.8	22.4	9	11.9			49.3	48.1	22.5	21.6			63.5	49.7	26.7	24.2			37.8	52.5	19	21.8
Q9H845	Acyl-CoA dehydrogenase family member 9, mitochondrial	1	1	4	High	1	68.7	0
P84077	ADP-ribosylation factor 1	1	2	27	High	2	20.7	0					17.9	16.6					44	46.5					44.5	41.4					29.6	46.5
P18085	ADP-ribosylation factor 4	1	3	27	High	2	20.5	0	6.8	2.5			5.9	6.4	15.7	12.1			19.6	12.5	20.4	22.3			16.5	18.8	11.1	19			14.1	12.2
Q02952-1	A-kinase anchor protein 12	1	5	1	High	1	191.4	0	4.4	6.6	23.8	41.1	22.8	35	24.4	31.1	119.3	117	104.1	114.3	36.7	28.7	96.9	69.5	90.8	81.2	18	19.3	61.7	63.8	75	78.7
Q9NRG9-1	Aladin	1	4	3	High	1	59.5	0	9.2	11	18	32.1	5.9	3.1	28.3	37.7	59.3	70.3	19	17.4	16	19.9	31.8	44.5	14.1	14.8	18.5	23	41.3	48.9	13.2	14.1
Q8IZ83	Aldehyde dehydrogenase family 16 member A1	1	2	2	High	1	85.1	0					2.5	5.1					14.4	16.6					8.4	10.7					9.7	7.6
P30837	Aldehyde dehydrogenase X, mitochondrial	1	2	2	High	1	57.2	0	11.9	16.2	37	50.7			16.3	16.7	52.3	50.9			20.8	16.9	46.7	58			17.2	17	45.4	57
P61163	Alpha-centractin	1	1	5	High	1	42.6	0			8.9	10.6					37.6	35.4					38.9	36.7					35.2	26.4
Q13155	aminoacyl tRNA synthase complex-interacting multifunctional protein 2	1	2	3	High	1	35.3	0			29.8	35.9	27.4	30.7			93.8	94.8	93.4	84.3			91.3	93.9	63.5	75.6			67.6	80.6	46.3	50.9
Q9UJX3-1	Anaphase-promoting complex subunit 7	1	3	3	High	1	66.8	0	3.6	6.5	5.6	5.2	5.2	8.1	22.4	24.8	27.3	32.5	26.2	21.7	19.2	13.3	19.8	22.6	21.4	22.5	21.7	22	22.7	22.9	25	25.7
O95782	AP-2 complex subunit alpha-1	1	3	2	High	1	107.5	0			4.5	16.3	5.8	9			21.5	25.6	19	17.4			23.2	18.8	15.1	15.7			14.7	18.6	17	17.5
P63010-1	AP-2 complex subunit beta	1	1	2	High	1	104.5	0			9.8	25.3					53.7	52.8					43.7	38.4					35.4	52.5
Q2VPB7	AP-5 complex subunit beta-1	1	2	2	High	1	93.9	0	7.1	7.9		7.3			21.3	34.1	14.5	26.4			23.1	17.9	13.5	12.6			16.2	20.5	12.2	14.2
Q13625-1	Apoptosis-stimulating of p53 protein 2	1	3	2	High	1	125.5	0	2.6	4.3	3.4	3.2		4.3	16.6	14	11.3	17.5	17.1	18.7	8.9	7.3	10.6	10.1	13.3	15.6	11.1	12.4	13.4	12.9	10.8	19
Q9Y2X7-1	ARF GTPase-activating protein GIT1	1	4	2	High	1	84.3	0			13.9	12.6	17.6	20.5			51.2	57.5	84.5	93.3			22.9	27.5	35.9	41			25.1	30.5	40.9	47
Q8WWN8	Arf-GAP with Rho-GAP domain, ANK repeat and PH domain-containing protein 3	1	3	1	High	1	169.7	0			7.2	11	7.7	9.5			15.3	20.2	14.8	18.5			14.4	14.4	15.5	14.1			15.4	18.2	16.7	32.4
P08243-1	Asparagine synthetase [glutamine-hydrolyzing]	1	3	4	High	1	64.3	0	13.7	18.2	16.7	16.8			52.3	51.4	42.8	41.8			38.4	28.8	27.4	29.4			26.6	33.9	30.4	33.1
Q9UBB4-1	Ataxin-10	1	2	4	High	1	53.5	0	6.4	5.2			5.3	4.7	29.6	30.5			19.1	20	24	24.2			21.8	18.7	18.6	25.7			16.1	21
P54252	Ataxin-3	1	3	4	High	1	41.8	0	3.7	4.6	1.9	2.1	8.1	12.3	15.7	15.1	16.8	26.9	37.2	40.9	17.7	19.7	18.4	22.4	31.8	52.5	14.6	17.2	16.5	21.7	41.9	59.8
P36542-1	ATP synthase subunit gamma, mitochondrial	1	2	10	High	1	33	0			10.1	10.7	5	8			32.5	34.4	21.2	23.8			21.6	27	16.5	23.3			21.5	31.6	17.2	19.7
Q5T2N8	ATPase family AAA domain-containing protein 3C	1	5	3	High	1	46.4	0	25.2	28.7	45.5	61.1	11.9	10.8	95.5	106	111	120.6	23.1	26.6	89.4	114.3	100.4	93.3	17.2	15.9	97.2	146.2	89.4	117.2	15.4	20.9
P61221	ATP-binding cassette sub-family E member 1	1	3	2	High	1	67.3	0	11.9	15.4	21.5	37.5	13	18.5	38.5	36.8	104.6	102.3	60.9	50.7	32.8	38.6	96.4	101.5	48.8	51.1	33.6	37.5	82.8	91.8	40.5	46.9
P17858-1	ATP-dependent 6-phosphofructokinase, liver type	1	1	3	High	1	85	0					13.8	14					41.5	50.1					38.4	45.2					29	42.2
Q92499	ATP-dependent RNA helicase DDX1	1	1	3	High	1	82.4	0					6.2	8					16.7	23					16.7	19.6					16.5	16.4
O43491-1	band 4.1-like protein 2	1	1	1	High	1	112.5	0			32.9	25.9					73.3	78.2					63.9	64.6					56.6	44.5
Q9Y4K1	beta/gamma crystallin domain-containing protein 1	1	3	1	High	1	188.6	0	5.9	5.3	5.3	5.9	8.8	8.2	20.4	30.4	18.3	21.7	23.2	34.8	14.4	13.5	11	15	15.2	9.3	11.1	14.6	9.2	14.8	13.6	13.8
Q13425-1	Beta-2-syntrophin	1	2	2	High	1	57.9	0	30.2	28.8			77.8	84.7	77.8	80.2			177.5	178.9	63.7	43.5			164	94.4	27.7	39.1			67.3	81.4
Q9UHR4	Brain-specific angiogenesis inhibitor 1-associated protein 2-like protein 1	1	2	4	High	1	56.8	0			28.2	23.6	16.5	24.1			68.1	85.6	50.2	61.4			46	28.5	31.3	34.2			20.7	37.3	22	25.9
Q7L273	BTB/POZ domain-containing protein KCTD9	1	1	4	High	1	42.5	0					6.2	10.2					37.4	33.6					26.9	32.7					25.9	31.8
Q13895	Bystin	1	3	3	High	1	49.6	0	3.6	8	13.1	21.3			20.6	23.1	44	43.7			16.7	20.2	33.2	46.1			20.4	20.3	35.8	38.8
Q13557	Calcium/calmodulin-dependent protein kinase type II subunit delta	1	1	3	High	1	56.3	0			19.8	28.2					67	55.8					54.8	66.3					40.9	49.8
Q99439	Calponin-2	1	2	6	High	1	33.7	0	21.3	23.2	31.5	30.6			32.3	36.6	40.9	53			37.4	23.4	54.9	42.2			22	31.5	32.9	49.7
P27797	Calreticulin	1	3	3	High	1	48.1	0	20.9	25.9	18.3	23.5	14.9	26.8	41.8	33.4	24.8	21.1	30.9	22.9	41.3	42.1	27.5	19.9	28.3	39	34.4	41.8	24.3	26.1	26.5	28.9
P17612	cAMP-dependent protein kinase catalytic subunit alpha	1	1	3	High	1	40.6	0			16.5	18.1					50.3	44					46.5	73.1					62.8	49.5
P10644	cAMP-dependent protein kinase type I-alpha regulatory subunit	1	1	3	High	1	43	0			9.9	13.8					42.1	37.6					43.4	50.3					33.7	38.3
Q96DG6	Carboxymethylenebutenolidase homolog	1	3	7	High	1	28	0	10.3	10.1	6.8	8.2			35.8	39.2	22.6	17.3			36.3	41.8	16.8	18.6			28.6	33.5	13.8	20.4
Q8N752	casein kinase I isoform alpha-like	1	3	3	High	1	39.1	0	16.5	18	79.4	67.8			49.3	53.4	200.4	234			41.5	30.4	177.2	176			23.8	28.9	131.4	156.3
P31944	Caspase-14	1	1	5	High	1	27.7	0
Q03135	Caveolin-1	1	1	12	High	1	20.5	0			20.5	14.8					38	46.3					20.4	15.6					14.5	25.2
Q92600	CCR4-NOT transcription complex subunit 9	1	2	7	High	1	33.6	0			5	3.2					16.4	18					10.3	9					8.3	11.1
Q9Y5K6	CD2-associated protein	1	2	2	High	1	71.4	0	7.2	10.8	11.3	12.5			27.2	26.3	36.9	43.4			22.2	21	33	28.9			16.2	22	18.3	32
P16070	CD44 antigen	1	2	2	High	1	81.5	0	15.3	20.7			19.2	22.5	37.7	33.4			40.6	43.6	25.2	21.3			31.6	22.7	19	19.4			18.1	18.9
P29373	Cellular retinoic acid-binding protein 2	1	1	7	High	1	15.7	0					17.6	19.2					51.7	39.1					60	56.3					25.9	29.1
O43264	Centromere/kinetochore protein zw10 homolog	1	1	2	High	1	88.8	0					44.8	32.3					70.2	91.7					81.6	37.4					33.9	36.5
Q9Y6K0	Choline/ethanolaminephosphotransferase 1	1	2	5	High	1	46.5	0			9.9	12.5	8.2	8.7			26.1	30.8	17.7	16.7			22.9	30.1	17.9	19.6			14.4	20.7	13.6	18.7
O14578	Citron Rho-interacting kinase	1	1	1	High	1	231.3	0					11.8	19.4					37.5	48.4					26.6	17.1					39.4	31
Q14677-1	Clathrin interactor 1	1	3	2	High	1	68.2	0	10.1	7.5	16.4	15	16.6	24.9	12.4	22.4	46.2	51.6	48.2	55.1	16.2	8.5	41.9	46.2	38.7	40.2	7.2	10.5	28.1	39.9	19.2	36.2
Q9P2I0	Cleavage and polyadenylation specificity factor subunit 2	1	3	2	High	1	88.4	0			10	9.4	4.5	7.8			39.5	56.8	15.5	15.3			36.9	34	13.2	14.7			38.6	43.2	14.8	18.9
O43809	Cleavage and polyadenylation specificity factor subunit 5	1	1	13	High	1	26.2	0					4.6	3.9					6.5	11.1					10.3	12.4					8.4	11.9
Q16630	Cleavage and polyadenylation specificity factor subunit 6	1	1	5	High	1	59.2	0			11.3	11.9					22.1	25.8					17.6	14.2					17.6	17.5
O75153	Clustered mitochondria protein homolog	1	1	1	High	1	146.6	0			19.8	26.9					63.4	54.8					52.2	49.4					32.7	50
Q14019	coactosin-like protein	1	2	11	High	1	15.9	0	4.9	4.8	5.7	2.7			13.8	13.7	11	11.9			20.2	23.8	13.2	17.9			15.3	16.3	9.3	11.5
O14579-1	coatomer subunit epsilon	1	1	8	High	1	34.5	0					17.7	15.3					10.9	12					37.9	40.9					30	30.6
O75534	cold shock domain-containing protein E1	1	1	2	High	1	88.8	0					29.8	28.4					64.4	55.8					49.2	44.2					48.9	43.9
Q14011	Cold-inducible RNA-binding protein	1	1	12	High	1	18.6	0					18.2	29.9					32.1	36.3					15.7	32.3					11.2	20.1
Q9BPX3	Condensin complex subunit 3	1	3	2	High	1	114.3	0	7.3	7.8	7	7.3	6.8	7.4	42.2	53	30.1	25.8	30.9	36.8	27.7	23.4	28.6	33.9	24.7	26.2	19.4	22	27.2	31.1	20.7	25.7
Q9UP83-1	conserved oligomeric Golgi complex subunit 5	1	1	1	High	1	92.7	0
P61201-1	COP9 signalosome complex subunit 2	1	1	6	High	1	51.6	0
Q9H9Q2	COP9 signalosome complex subunit 7b	1	1	7	High	1	29.6	0					4.5	7.2					17.7	25.2					23.1	26.5					25.5	33.5
Q04656-1	copper-transporting ATPase 1	1	4	2	High	1	163.3	0	5.4	4.8	5.3	6.2	4.3	7.4	11.8	10.7	10.7	10.5	14	8.9	13.2	14.5	10.8	14.1	12.8	14.5	4.8	13.5	9.9	9.6	12.1	15.4
Q9ULV4	coronin-1C	1	3	3	High	1	53.2	0	16.1	23.5	32.9	33.3			32.3	39.7	84.9	87.5			29.5	20.9	53.3	47.5			17	22.1	43.6	42.1
Q9UQ03-1	Coronin-2B	1	1	5	High	1	54.9	0					6.9	12.6					28.3	28.3					18.5	21					19	29.1
P24468	COUP transcription factor 2	1	1	4	High	1	45.5	0					9.3	11.3					35.1	42.7					41.7	53.6					43.7	42.1
P12277	Creatine kinase B-type	1	1	3	High	1	42.6	0					11.4	13.4					35.4	30.4					48.5	42.2					31.6	32.7
P17812	CTP synthase 1	1	3	3	High	1	66.6	0			11.8	21.1	5.8	13			33	39.4	16.5	24.6			23.6	29	18.3	19.1			29.4	38.2	15	18.1
Q13616	Cullin-1	1	1	3	High	1	89.6	0					11.9	10.1					31.7	29.8					31.5	36.9					21.4	30.9
Q93034	Cullin-5	1	1	3	High	1	90.9	0			5.8	8.2					16.7	23.6					19.6	25.7					20.2	28.1
P06493	Cyclin-dependent kinase 1	1	6	7	High	1	34.1	0	19.6	33.3	15	22.7	14.4	18.9	78.6	87.6	93.4	104.8	56.9	65.3	65.9	65.9	89.8	99.3	58.3	48.2	62.5	89.2	85.8	110.5	52.1	74.2
O14976	Cyclin-G-associated kinase	1	1	1	High	1	143.1	0			9.6	15.4					34.8	36.5					27.6	40.1					30.5	25.7
Q9Y6G9	Cytoplasmic dynein 1 light intermediate chain 1	1	1	4	High	1	56.5	0
Q7Z7A3	Cytoplasmic tRNA 2-thiolation protein 1	1	1	5	High	1	36.4	0
Q5M775-1	Cytospin-B	1	1	1	High	1	118.5	0
Q9Y4B6	DDB1- and CUL4-associated factor 1	1	3	1	High	1	168.9	0	6.5	12.9	6.9	8.4	5.9	10.8	39.5	43.6	27.8	24.5	32.3	25	39	51.3	27.6	36.1	32.5	43.6	45.9	53.6	34.3	31.5	32.9	42.6
Q96N67	Dedicator of cytokinesis protein 7	1	3	1	High	1	242.4	0	10.2	10.7	18.2	21.8	21.3	27.7	38.9	52.6	73	97.5	74	107.5	27.3	22.5	42.6	42	36.2	37.5	12.9	27	30.1	46.1	30.4	41.8
Q9BZ29-1	Dedicator of cytokinesis protein 9	1	4	1	High	1	236.3	0	7.3	7.7	7.5	10.9	3.7	5.5	22.6	21.8	28.9	28.9	16.1	13.8	15.2	23.8	29.3	34.2	16.5	18.5	22.1	27.5	24.8	35.3	17.9	28.6
Q15392	Delta(24)-sterol reductase	1	2	4	High	1	60.1	0
P54886	delta-1-pyrroline-5-carboxylate synthase	1	3	3	High	1	87.2	0	5.8	9.8	9.4	10.5	7.9	7.8	16.1	22.2	15.3	19	17.6	14.6	13.6	19.5	16.3	18.7	16.6	15.5	22.8	21.9	16.2	19.5	21.1	23
Q02413	Desmoglein-1	1	1	2	High	1	113.7	0					14.3	18.7					30.8	24.7					19.4	18.6					13.2	16.1
Q9Y295	developmentally-regulated GTP-binding protein 1	1	2	8	High	1	40.5	0					2.2	3.9					9.5	15					10.9	8					9.9	12.1
P10515	Dihydrolipoyllysine-residue acetyltransferase component of pyruvate dehydrogenase complex, mitochondrial	1	1	2	High	1	69	0			18.5	26.2					83.7	98.9					105.4	113.1					88.5	96.7
Q16555-1	Dihydropyrimidinase-related protein 2	1	2	3	High	1	62.3	0			10.9	9.6	9.3	7.3			33.2	38.9	29.8	29.6			33.1	27.4	31.9	20.8			30.5	29.2	21.5	30.9
Q9P265	Disco-interacting protein 2 homolog B	1	1	1	High	1	171.4	0	6.7	9.3					55.5	54.1					43.6	57.9					50.8	67
Q13444	Disintegrin and metalloproteinase domain-containing protein 15	1	3	2	High	1	92.9	0	5.2	7.1	14.9	17.1	11.4	16.4	43.1	37.4	92.7	93.7	90.9	88.8	13.7	13	27.9	33.8	15.1	25.4	15.3	26.5	33.9	56.3	29.3	46.7
P25205	DNA replication licensing factor mcm3	1	1	2	High	1	90.9	0					7.9	7.8					26.4	26.4					31.7	41					24.1	26.5
P11387	DNA topoisomerase 1	1	1	2	High	1	90.7	0			16.3	16					41.6	39					35.7	38.8					24.5	28.6
O95602	DNA-directed RNA polymerase I subunit RPA1	1	1	1	High	1	194.7	0					5.1	5.6					14.2	19.3					18.1	18.2					15.1	17.1
P30876	DNA-directed RNA polymerase II subunit RPB2	1	2	1	High	1	133.8	0	5.1	7.9					56.8	54.8					53.3	42.6					55.7	61.5
O75190	DnaJ homolog subfamily B member 6	1	4	6	High	1	36.1	0				4.6	6.8	4	14.2	12.5	11.6	12.8	18.8	14.7	9.8	11	8.5	11.6	14.7	12.1	18.3	11.6	20.5	13.8	13.1	15.6
Q99615-1	DnaJ homolog subfamily C member 7	1	1	2	High	1	56.4	0					11.3	10.3					39.9	36.5					30.5	33.5					30.2	35.9
O60762	Dolichol-phosphate mannosyltransferase subunit 1	1	1	3	High	1	29.6	0					14.8	19.9					28.5	30.1					28.3	26					28.9	30.4
P45985	Dual specificity mitogen-activated protein kinase kinase 4	1	2	4	High	1	44.3	0			7.3	8.1	7.3	6.7			28.1	32.6	29.4	35.8			25.6	34.3	31.7	35.4			25.2	29.2	38.4	48.8
Q99956	Dual specificity protein phosphatase 9	1	1	4	High	1	41.8	0
Q6XZF7	Dynamin-binding protein	1	2	1	High	1	177.2	0
Q96FJ2	Dynein light chain 2, cytoplasmic	1	2	12	High	1	10.3	0					41.7	74.3					74.4	63.2					46.2	40.3					44.6	35.9
Q9P0J7	E3 ubiquitin-protein ligase KCMF1	1	4	4	High	1	41.9	0	4.2	9.1	7.6	22.2	16.2	19.8	18.4	17.5	16.1	16.4	70.1	81.8	21.3	21	17.8	18	83.4	88.9	19.1	27.5	17.3	20.1	80.8	80.2
Q6UWE0	E3 ubiquitin-protein ligase LRSAM1	1	1	2	High	1	83.5	0			23.4	25.8					69.5	76					51.5	50.6					42	61.9
Q5XPI4	E3 ubiquitin-protein ligase RNF123	1	1	1	High	1	148.4	0
Q8IWV8	E3 ubiquitin-protein ligase UBR2	1	5	1	High	1	200.4	0	3.2	5.2	6.8	16	12	10.8	28.9	25.2	71.8	65.7	84.6	77.8	31.3	23	67	67.7	78.7	80.7	25.8	23.1	72.5	61.3	77.6	72.5
O94874-1	E3 UFM1-protein ligase 1	1	2	3	High	1	89.5	0	5.2	5.7			3.9	7.6	17.7	19			16.2	12.9	13.3	14.9			14.2	13.9	15.8	20.4			16.1	21
Q32P44	Echinoderm microtubule-associated protein-like 3	1	1	3	High	1	95.1	0
Q9NZN4	EH domain-containing protein 2	1	1	2	High	1	61.1	0			14.7	20.9					55	68.9					53.7	67.7					61.3	91
Q9H223	EH domain-containing protein 4	1	2	3	High	1	61.1	0					8.7	18.4					51.5	57.3					60.7	58.9					52.4	56.3
P24534	Elongation factor 1-beta	1	1	6	High	1	24.7	0					26.8	28					67.6	54.9					41.3	40.1					34.4	36.1
P29692	Elongation factor 1-delta	1	1	3	High	1	31.1	0					21.5	26.2					57.6	55.8					47.9	45.5					26.4	29.3
P49411	elongation factor Tu, mitochondrial	1	1	4	High	1	49.5	0					9.1	13					24.1	18.2					26.1	27.6					19.6	21.9
P50402	Emerin	1	1	5	High	1	29	0					38.2	35					42.9	32.5					40.4	32.6					25.6	15.2
P14625	Endoplasmin	1	4	4	High	2	92.4	0			21.5	23.8					43	39.8					34.8	45.4					37.1	56.3
Q9H6S3	epidermal growth factor receptor kinase substrate 8-like protein 2	1	2	3	High	1	80.6	0	15.8	24.3			29.9	40.9	60.6	54.7			108.9	123.7	55.1	37.1			118.3	65.5	23.5	31			58.2	67.4
Q9UHF1	Epidermal growth factor-like protein 7	1	6	8	High	1	29.6	0	106.5	116.8	158.4	171.9	40.1	48.9	139	123.2	200	192	61.8	53.8	60.3	64.8	80.1	108.9	27.4	28.2	66.9	88.5	96.2	139.5	24.9	28.8
Q6NXG1-1	epithelial splicing regulatory protein 1	1	4	2	High	1	75.5	0	11.6	11.2	9.3	11.4	15	15	27	35.3	28.4	39.8	43.1	47.8	25	23	35.4	34.5	43.6	34.7	26.4	23	23.2	33.9	36.8	37.3
P27105	erythrocyte band 7 integral membrane protein	1	1	6	High	1	31.7	0			34.6	32.4					62	73.2					57.2	45.8					40.7	56.1
O14681	Etoposide-induced protein 2.4 homolog	1	3	6	High	1	38.9	0	4.7	2.9	4.3	2.4	8	5.6	8.5	15.5	12.9	14.6	13.6	18.1	14.2	18	14.3	10	17.3	16.2	15.6	14.7	10.9	13.1	22.1	21.1
O43324-1	Eukaryotic translation elongation factor 1 epsilon-1	1	1	6	High	1	19.8	0					10	12.9					26.2	27.7					23.9	22					23.5	18.1
Q9BY44-1	Eukaryotic translation initiation factor 2A	1	2	3	High	1	64.9	0					12.1	12.6					23	21.6					27.5	35.9					35.2	19.5
P55884	Eukaryotic translation initiation factor 3 subunit B	1	3	2	High	1	92.4	0	8.2	8.5	22.5	24.3	18.1	24.9	27.4	33.2	69.9	70.6	73.6	65.4	33.3	39.4	67.4	73.7	90	92.7	25.9	31.6	52.5	60.6	66.2	81.2
Q9UBQ5	Eukaryotic translation initiation factor 3 subunit K	1	1	9	High	1	25	0	7.1	10.8					37.6	41.1					34.7	28.8					31.7	34.4
Q7L2H7	Eukaryotic translation initiation factor 3 subunit M	1	4	5	High	1	42.5	0	4.2	11.3	8.1	11			64	79.5	76.7	85.6			78.5	71.5	81.5	83.9			85.2	105.8	84.9	124.6
Q04637	eukaryotic translation initiation factor 4 gamma 1	1	2	1	High	1	175.4	0	2.7	3.2	3.7	5.2			12.6	16	20	21			10.6	13.4	18.6	22.5			12.4	15.2	13.9	27.5
P23588	eukaryotic translation initiation factor 4B	1	1	4	High	1	69.1	0
P06730	Eukaryotic translation initiation factor 4E	1	1	6	High	1	25.1	0
Q96QU8	Exportin-6	1	2	1	High	1	128.8	0	6.2	33			6.2	16.5	27.3	18.6			28.8	20.9	59.2	60.2			33.2	32.3	50.3	52.3			36.8	34.8
Q08945	FACT complex subunit SSRP1	1	1	4	High	1	81	0			9.7	7.9					37.9	54.3					28.2	32.4					26.3	28.8
Q01469	Fatty acid-binding protein, epidermal	1	2	7	High	1	15.2	0	35.5	49			57.6	69.7	71.1	58.9			109.1	101.3	55.3	49.4			72.2	65.7	27.3	31.7			42.1	57.6
P51648	Fatty aldehyde dehydrogenase	1	3	5	High	1	54.8	0	7.5	7.5	4.8	6.2	4.5	4.9	23.2	20.5	24.1	27	21.3	21.7	20.2	27.7	28.1	27.1	21.5	21.7	17.6	24.6	19.4	20.2	20.7	22.9
Q9UK22	F-box only protein 2	1	1	9	High	1	33.3	0					5	9.6					36.1	34.7					65.4	57.4					26.8	41.4
Q9NRD1	F-box only protein 6	1	3	8	High	1	33.9	0		3.8	5.2	9			13.7	15.9	29.3	34			13.1	17.9	24.7	30.8			13.1	15.6	21	30.5
Q9Y3I1	F-box only protein 7	1	1	4	High	1	58.5	0	6.5	10.1					25.7	24					22.5	22.8					25	29.7
Q9Y4F1	FERM, RhoGEF and pleckstrin domain-containing protein 1	1	1	1	High	1	118.6	0					24.9	33.6					72.7	89.9					46.2	37.3					29.8	41.2
Q5D862	Filaggrin-2	1	5	0	High	1	247.9	0	55.4	73.9	107.2	168.6	83.2	131.1	70	54.8	155.9	129.2	115.8	100.2	51.5	63.2	151.1	159.4	88	109.3	48.6	42	129	108.4	79.4	66.1
P57678	Gem-associated protein 4	1	1	3	High	1	120	0	3.9	3.9					26.1	27.2					19	17					16.3	28.3
Q9UKN8	General transcription factor 3C polypeptide 4	1	2	2	High	1	91.9	0			6.7	9.9	5.7	9			37.8	40.5	30.8	39.1			27.9	29.2	23.6	27.5			33	30	24.1	31.3
P78347	General transcription factor II-I	1	1	3	High	1	112.3	0			5.9	6.4					32.5	35.8					16.7	18.7					21.3	27.1
Q9NQX3	Gephyrin	1	1	5	High	1	79.7	0	3.4	4.6					16	17.3					15.7	11.7					11.3	12
P53611	Geranylgeranyl transferase type-2 subunit beta	1	1	5	High	1	36.9	0					6.6	8					17.6	21.5					18.5	24.2					15.7	19
P06744	glucose-6-phosphate isomerase	1	3	3	High	1	63.1	0	11.6	15.2			4.7	5.1	35	34			26.3	30.4	46.1	44.1			23.5	29.9	30.9	28.9			19.7	26.3
P47897	glutamine--tRNA ligase	1	3	1	High	1	87.7	0	15.4	15.2	59.1	87.7	11.6	22.4	43.4	48.1	116.4	117.7	36.2	37	45.1	50.7	83.9	94	30.1	37.8	29.5	38.1	55.9	81.1	21.9	25.9
O76003	glutaredoxin-3	1	1	4	High	1	37.4	0
Q8NEC7-1	Glutathione S-transferase C-terminal domain-containing protein	1	1	2	High	1	71	0					6.7	7.7					21.8	22.5					19.6	21.5					26	22.7
A6NDG6	glycerol-3-phosphate phosphatase	1	2	7	High	1	34	0			7.8	8.3	2.9	5.7			25.4	33.9	13	11.1			19.5	16.7	9.7	15.7			18.3	21.4	6.5	10.3
Q7L5D6	Golgi to ER traffic protein 4 homolog	1	3	5	High	1	36.5	0	4.9	7.3	9.1	12.9	5.9	4.9	30	24.1	65.9	51.3	29.1	22.3	28	27.3	47.8	62.9	24.4	29.4	22.6	25.8	49.1	57	19.6	18.5
Q14451	Growth factor receptor-bound protein 7	1	2	3	High	1	59.6	0			19.3	18.3					58.2	58.6					63.8	55.6					46.9	46.7
P52735	Guanine nucleotide exchange factor VAV2	1	1	2	High	1	101.2	0			3.6	9.7					20.4	23.8					27.8	36.5					31.4	38.8
Q9UBI6	guanine nucleotide-binding protein g(i)/g(s)/g(o) subunit gamma-12	1	3	22	High	1	8	0
O95837	Guanine nucleotide-binding protein subunit alpha-14	1	2	5	High	1	41.5	0			9	11.2					25.4	30.4					23.7	25.8					17.5	25.1
O94927	HAUS augmin-like complex subunit 5	1	1	3	High	1	71.6	0			9.3	9.8					37.9	35.1					32.9	33.9					25.6	34.1
O00165	HCLS1-associated protein X-1	1	1	9	High	1	31.6	0	8	13.5					20.7	22.3					20.1	19					18.6	17.1
Q6AI08	HEAT repeat-containing protein 6	1	1	1	High	1	128.7	0
P17066	Heat shock 70 kDa protein 6	1	22	13	High	7	71	0	21.1	27.5	37.9	52.9	14.1	16.8	64.2	50.7	90.4	83.6	41	35.3	46.5	32.9	71.1	72.4	25.5	31.3	39	40.8	52.6	48.2	22.4	21.6
Q92598	Heat shock protein 105 kDa	1	2	2	High	1	96.8	0	6.7	11.2			4.6	5.6	29.4	30.3			31.5	24.2	25.1	33			21.2	25.2	27.6	30.9			18.5	27.1
Q14527	Helicase-like transcription factor	1	1	2	High	1	113.9	0					5.9	2.3					33.5	46.5					44.8	44.5					32.9	38
Q86YV9	Hermansky-Pudlak syndrome 6 protein	1	1	2	High	1	82.9	0			6.6	6.9					22.1	19.3					23.6	21.4					28.2	24.6
Q32P51	Heterogeneous nuclear ribonucleoprotein A1-like 2	1	2	5	High	1	34.2	0					41.6	42.2					79	96.6					70.7	71.6					46.5	65
P51991-1	Heterogeneous nuclear ribonucleoprotein A3	1	1	4	High	1	39.6	0
Q14103	heterogeneous nuclear ribonucleoprotein D0	1	3	2	High	1	38.4	0	84.1	103.4	88	90.9	68.1	74	120.3	148.7	116.6	124.1	113	121.1	111.6	113.2	90.4	104.8	86.5	102.7	68.1	78.6	59.8	84	55.5	73.8
Q00839	Heterogeneous nuclear ribonucleoprotein U	1	1	2	High	1	90.5	0			32	28.7					59.5	52.5					34	38					25.3	28.8
Q9Y241	HIG1 domain family member 1A, mitochondrial	1	3	24	High	1	10.1	0	6.1	10.3	13.8	16.1	18	19.4	23.4	26.2	34.9	39.6	59.7	54.3	12	9.8	14.6	17.5	19.3	30.9	8.5	15.7	19.4	18.3	20.8	37
P12081	Histidine--tRNA ligase, cytoplasmic	1	2	3	High	1	57.4	0			7.5	9.5	8.1	11			28.5	26.2	30	29.1			25.5	28.8	27.5	34.3			22.2	26.7	25.7	32.6
Q969S8-1	Histone deacetylase 10	1	1	3	High	1	71.4	0			11	15.8					40.6	34.8					32.9	35.3					27.9	34.2
Q9UBN7-1	histone deacetylase 6	1	1	2	High	1	131.3	0			5.3	7.6					20.9	18.2					20.8	22.7					12	18.1
P07305	Histone H1.0	1	1	5	High	1	20.9	0			85	93.6					124.9	104.3					81.8	72.8					47	43.4
Q96QV6	Histone H2A type 1-A	1	7	24	High	2	14.2	0			74.5	61.8	20.8	25.1			100.5	246.8	32.4	74.8			34.4	31.4	14	16.8			25.8	35.2	11.2	14.9
Q16777	Histone H2A type 2-C	1	11	22	High	2	14	0	103.5	107.1	246.2	232.8	105.3	119.1	198.7	312.1	355	718	180.1	326.2	88.5	107.7	94.5	70.1	77	59.7	65.7	86.1	67.4	96	68.8	60.1
P68431	Histone H3.1	1	6	40	High	4	15.4	0			112.7	145.5	130.5	148.9			326	547.1	247.1	507.5			105.9	120.6	108.2	106			79.6	90.9	66.3	70.9
Q71DI3	histone H3.2	1	7	40	High	4	15.4	0			13.3	15.7					27.2	53.8					20.6	14.5					18.3	16.8
P84243	histone H3.3	1	7	40	High	4	15.3	0			14.7	24.4					54.8	129.3					20.5	14.9					13.8	20.1
Q86X55	Histone-arginine methyltransferase CARM1	1	4	4	High	1	65.8	0	4.1	7.6	7.9	4.4	6.8	13.9	23.7	23.5	27.8	25.4	33.2	32.7	22.3	20.9	23.3	24.2	33	31.9	15.5	19.8	13.5	22.8	22.6	33.5
P05534	HLA class I histocompatibility antigen, A-24 alpha chain	1	7	8	High	2	40.7	0	42.1	51.7	14.8	17.3	33.8	41.8	77.4	86.6	37	39	82.8	93.2	89.8	93	23	25.6	59.3	79.8	67.5	77.1	25.3	33.2	58.4	81.6
P01889	HLA class I histocompatibility antigen, B-7 alpha chain	1	7	9	High	2	40.4	0					24.7	31.6					43.9	40					38.6	36.3					23.8	32.6
O00629	Importin subunit alpha-3	1	1	3	High	1	57.9	0					3	4.8					13.7	17.5					10.5	19.2					9.8	17.2
Q9UI26	Importin-11	1	1	2	High	1	112.5	0			6.3	10.6					21.1	16.4					19.2	21.7					18.6	23.1
Q15181	Inorganic pyrophosphatase	1	1	5	High	1	32.6	0	21	23.3					65	69.9					62.1	59.4					58.3	74.2
Q9BY32-1	Inosine triphosphate pyrophosphatase	1	1	7	High	1	21.4	0			6.6	8.3					16.7	15.1					23.6	25.8					18.1	22.8
Q9NPH2	Inositol-3-phosphate synthase 1	1	2	2	High	1	61	0	9.5	11.7	12.1	16.5			45.4	45.3	43.7	43.2			47.1	47	86.4	58.6			35	43.4	75.8	39
Q9H0C8	Integrin-linked kinase-associated serine/threonine phosphatase 2C	1	3	5	High	1	42.9	0	7.7	5.8	6.1	7	7	9.9	23.3	27.6	37.4	27.1	27.2	31.1	21.5	24	33.3	34.7	42.5	32.7	22.9	26.5	34.1	36.5	33.3	38.1
P19525	interferon-induced, double-stranded RNA-activated protein kinase	1	4	2	High	1	62.1	0	9.2	10.8	12.1	9.7	12.8	16.2	32	24.9	39.1	37.6	48	48	30.7	30.8	38.4	35.6	53.2	71.6	22.6	27.1	26.8	48.1	49.8	59.9
P51617	interleukin-1 receptor-associated kinase 1	1	3	3	High	1	76.5	0	4.1	3.8	2.5	5.3			18.5	19.3	14.8	14.9			15.3	18.8	15.5	19.7			15.8	19.8	12.9	15.2
Q9Y547	Intraflagellar transport protein 25 homolog	1	1	8	High	1	16.3	0			10.4	9.7					29.6	29.1					37.6	33.2					25.7	30.2
Q9NVI1-1	Isoform 1 of Fanconi anemia group I protein	1	3	1	High	1	142.5	0	8.5	16.1	6.7	7.2	5.9	7.6	49.7	42.8	35	43.2	28.2	20.6	35.1	43.4	24.4	28.3	24.4	28.4	34.2	45.5	28.4	36.3	21.5	24.6
O60936-1	Isoform 1 of Nucleolar protein 3	1	2	9	High	1	24.3	0			7.8	9.4	11.4	10.3			21.8	24.3	19.7	23.8			24.7	23.1	24.4	27.3			18.3	29.4	24	28
Q63HN8-4	Isoform 2 of E3 ubiquitin-protein ligase RNF213	1	1	0	High	1	596.1	0	4.7	6.2					25.7	22.9					30.5	24.4					63.9	33.4
O75449-1	Katanin p60 ATPase-containing subunit A1	1	3	2	High	1	55.9	0					10.7	12.5					109.7	77.3					81.5	96.1					75.8	61.1
P19013	Keratin, type II cytoskeletal 4	1	16	7	High	4	57.3	0					4.9	4.2					9.9	16					9.4	11.6					12.3	16.9
P13647	keratin, type II cytoskeletal 5	1	29	12	High	7	62.3	0	234	479.6	234.7	455.9	262.3	548	271.9	177.2	276.3	190.5	337.3	216.7	101	106.5	108.8	105.6	138.5	113.5	80.8	93.4	93.2	108	105.3	122.1
Q7RTS7	Keratin, type II cytoskeletal 74	1	3	4	High	2	57.8	0	135.6	189.4					113.7	90					55.8	50.8					29.6	36.2
O95678	Keratin, type II cytoskeletal 75	1	17	10	High	6	59.5	0					73.8	263.7					76.7	50.8					32	19.1					25	25
O15066	Kinesin-like protein KIF3B	1	2	3	High	1	85.1	0	6.3	8.6	5.7	11.5			26.2	24.7	38.6	33.4			34	23.2	27.5	31.7			26.2	18.3	27.1	28.8
Q6PKG0-1	La-related protein 1	1	2	1	High	1	123.4	0			14.6	16	14.4	12.8			40.3	45.2	40.9	33.3			34.8	33.3	26.1	26.1			35.2	38	25	41
Q96AG4	Leucine-rich repeat-containing protein 59	1	1	4	High	1	34.9	0	16.6	21.8					42.4	35.4					46.2	58.2					34.1	41.6
P50851-1	Lipopolysaccharide-responsive and beige-like anchor protein	1	1	1	High	1	318.9	0					5.7	5.5					64.7	52.2					31.1	92.5					63.4	60.1
P07195	L-lactate dehydrogenase B chain	1	4	4	High	1	36.6	0	7.5	10.1	13.6	21.3	21.6	26.9	25.1	27.2	54.3	66.1	85.1	76.6	24.1	27.6	52.7	48.5	77.4	77.7	25.7	23.1	38.4	51.4	55.7	71.7
Q6PCB7	long-chain fatty acid transport protein 1	1	1	4	High	1	71.1	0
O60488-1	Long-chain-fatty-acid--CoA ligase 4	1	3	2	High	1	79.1	0	9.1	9.8					36.9	35.7					35.9	41.3					24.2	32.9
Q7Z4W1	L-xylulose reductase	1	3	7	High	1	25.9	0	7.5	11.2	2.9	3.7	4.7	4	20.7	24.4	9.7	16.2	18	14	13.4	17.4	11.1	13	12.8	19.2	17.1	26.2	12.1	11.7	19.6	18.3
Q9HBW0	Lysophosphatidic acid receptor 2	1	3	6	High	1	39.1	0	5.1	11.7	4.9	8.8	8.3	6.9	21.5	26.1	15.6	22.6	23.8	25.8	21.1	18.3	11.3	9.9	17.4	19.2	15.8	21.8	12	17.2	20.5	21.3
P42785-1	lysosomal Pro-X carboxypeptidase	1	2	4	High	1	55.8	0			20.5	19					80.7	78.4					54.1	61.2					53.2	59.6
P14174	Macrophage Migration inhibitory factor	1	4	8	High	1	12.5	0	105.1	141.1	77	104.1	68.9	79.3	142.1	131.3	98.5	95.9	80	70.7	110.4	133.7	89.3	104.2	62	72.2	88.6	100.8	67.1	77.3	57	55
Q8NDA8-1	Maestro heat-like repeat-containing protein family member 1	1	1	1	High	1	181.1	0
P43243	Matrin-3	1	1	2	High	1	94.6	0
P56192	Methionine--tRNA ligase, cytoplasmic	1	1	1	High	1	101.1	0					32.8	33.2					50.8	46.3					37.8	36.9					24.5	29.7
Q16891	MICOS complex subunit Mic60	1	1	3	High	1	83.6	0					4.2	3.9					14	16.1					9.5	13					12.1	11.6
Q15555	Microtubule-associated protein RP/EB family member 2	1	3	4	High	1	37	0			11.7	12.5	8.4	11			39.6	44.3	26.5	30.2			43.5	39.2	35	38.6			27.1	32	20.1	25.5
Q504T8	Midnolin	1	3	4	High	1	49.2	0			7.6	5.8	5.5	5.5			25.2	26.3	26.2	24			22.9	24.9	22.5	20.2			23.7	25.1	24.4	28.2
Q8N8R3-1	mitochondrial basic amino acids transporter	1	1	8	High	1	32	0			9.2	13					20.8	29.8					20.8	19.4					18.6	21.6
Q3ZCQ8	Mitochondrial import inner membrane translocase subunit TIM50	1	2	3	High	1	39.6	0			51.1	53.7					88.5	81					67.3	70.5					71.1	78.7
Q15785	Mitochondrial import receptor subunit TOM34	1	3	5	High	1	34.5	0	4.5	7.4	12.3	12.4	7.5	9.6	20.7	19.8	58.1	55.5	20.8	19.3	22.9	20.9	52.3	66.2	21.7	24.7	17.4	23.4	45.9	45.4	21.5	18.3
Q9Y619	mitochondrial ornithine transporter 1	1	6	9	High	1	32.7	0	8.4	11.1	18.4	21.5	40.7	47.8	12.5	15.1	28.9	29.8	59.2	58.9	10.6	12.1	15.6	23.5	37.8	48.4	11.1	15.2	15.2	27.1	49.9	57.4
P28482	mitogen-activated protein kinase 1	1	1	7	High	1	41.4	0					6.3	8					23.4	26.6					40.9	48.6					45.1	41.5
O15427	Monocarboxylate transporter 4	1	2	2	High	1	49.4	0	24.2	43.7	42.4	51.4			65.2	95.9	87.8	87.8			54.3	54.7	63.3	66.2			41	52	43.6	49
Q9NZM1	Myoferlin	1	1	1	High	1	234.6	0			15.5	16.8					50.6	57.3					42.6	54.4					38	46.3
Q6WCQ1	Myosin phosphatase Rho-interacting protein	1	2	1	High	1	116.5	0			23	24.4	28	28.5			38.8	32.2	57.4	41			26.2	23.4	43	35.4			23.6	20.7	34.3	29.6
P35580	Myosin-10	1	3	1	High	2	228.9	0			8	10.7					41.5	44.9					40.4	52.4					33.5	43.7
Q8WXR4	Myosin-IIIB	1	3	1	High	1	151.7	0	24	27.9	26.8	35.2	25.5	34.5	66.9	67.1	63.3	73.2	85.3	82.7	71.6	55.5	69.3	59.3	80.9	69.3	41.4	48.1	36.6	49.8	46.2	59.7
O75251	NADH dehydrogenase [ubiquinone] iron-sulfur protein 7, mitochondrial	1	1	13	High	1	23.5	0
Q6N069	N-alpha-acetyltransferase 16, NatA auxiliary subunit	1	1	2	High	1	101.4	0
Q96JN8-1	Neuralized-like protein 4	1	1	1	High	1	166.8	0			7.1	5.9					59.5	61.4					38	37.8					51.9	53.4
P61601	Neurocalcin-delta	1	1	4	High	1	22.2	0
O15240	Neurosecretory protein VGF	1	1	3	High	1	67.2	0			7.3	8.5					16.7	14					13	20.9					16.1	16.7
Q15233	Non-POU domain-containing octamer-binding protein	1	3	5	High	1	54.2	0			3.6	7.4	2.6	6.9			20	27.8	12.6	15.8			18.5	20.8	11.1	18.1			17.1	23.6	15.6	14.6
Q96KG9	N-terminal kinase-like protein	1	2	3	High	1	89.6	0					9.3	12.8					43.6	48.9					45.8	42.6					29.7	42
Q9Y266	nuclear migration protein nudC	1	3	6	High	1	38.2	0	5.6	5.5	5.9	2.3	4.4	3.6	18.1	23.4	21.8	26	14.4	15.4	20.4	17.3	26	26.6	12.7	19.2	16	20.9	16.7	20	13.4	16.6
P57740	Nuclear pore complex protein Nup107	1	1	2	High	1	106.3	0			7.1	9					25.2	32					26.3	24.2					48.3	26.3
Q8WUM0	Nuclear pore complex protein Nup133	1	1	1	High	1	128.9	0			13.4	14.1					37.9	51.3					23.8	29.8					29.7	32.5
O75694	nuclear pore complex protein nup155	1	1	2	High	1	155.1	0			6.3	7.5					18.4	23.9					9.8	14.1					16.5	14.6
Q12769	nuclear pore complex protein Nup160	1	2	1	High	1	162	0			5.3	3.7	9.8	11.4			14.6	22.5	21	20.5			15.4	18.8	17.3	23.9			18.9	23.2	18.4	20.2
P15531	Nucleoside diphosphate kinase A	1	6	29	High	3	17.1	0				1.8					15.3	18.8	13.5	18.4			9.4	8.6	8.2	8.7			8.1	7.8	9.2	11.6
P22392	nucleoside diphosphate kinase b	1	5	23	High	3	17.3	0			18.2	26.6	75.4	78.3			60.2	43	193.6	183.1			52.1	63.8	142.9	154.3			39.8	37.2	116.2	120.1
P55209	Nucleosome assembly protein 1-like 1	1	5	3	High	1	45.3	0	60.6	106	104.8	155.3	59.6	106.9	165.7	133.4	253.4	225.2	172.4	138.8	178.4	198.3	321.1	354.3	187.6	193	153.7	175.6	264.5	287.4	144	188.7
Q99733	Nucleosome assembly protein 1-like 4	1	1	3	High	1	42.8	0	17.7	27.8					38.4	45.6					51.3	56.8					46.9	50.6
P36551	Oxygen-dependent coproporphyrinogen-III oxidase, mitochondrial	1	3	2	High	1	50.1	0	14.2	17.3	32.5	33.4	13.7	12.2	27.9	24.7	89.1	71.4	27.2	25.4	26.9	28.6	67.3	85.3	23.3	27.3	20.5	22.2	60.4	63.5	19.6	20.2
O95428	Papilin	1	3	2	High	1	137.6	0					6.5	10.6					18	26.1					18.7	17.8					17	19.2
O14908-1	PDZ domain-containing protein GIPC1	1	2	7	High	1	36	0	7.9	10.7			11	8.5	27	39.5			33	44.1	25.5	27.6			26.2	20.5	25.6	27.5			31.1	31.6
Q8WV60	Pentatricopeptide repeat-containing protein 2, mitochondrial	1	1	3	High	1	43.9	0			31.7	32.7					46.4	31.2					33	31.1					25.3	29.2
Q96IV0	Peptide-N(4)-(N-acetyl-beta-glucosaminyl)asparagine amidase	1	1	2	High	1	74.3	0			8	10.1					29.4	35.4					39.5	58.3					37.4	40.3
P42356	phosphatidylinositol 4-kinase alpha	1	3	1	High	1	236.7	0	7	9.7	9.4	10	4.5	5.4	22.2	24.4	16.9	24.8	9.9	13.1	19.1	17	21.5	18.9	7.4	10.2	23.4	24	19.3	22.2	10.9	12
Q14558	Phosphoribosyl pyrophosphate synthase-associated protein 1	1	1	4	High	1	39.4	0			8.1	7.2					28.4	27.4					17.4	22.3					23.4	21.5
Q6NYC8	Phostensin	1	1	2	High	1	67.9	0			12.9	14.7					37	32.9					34.9	23					27.9	27.1
Q9Y446	Plakophilin-3	1	2	2	High	1	87	0	53	48.5			16.1	12.6	90.4	111			43.3	42	77.4	85.5			42.2	36.5	51	58.9			26.6	28.7
Q8NC51-1	Plasminogen activator inhibitor 1 RNA-binding protein	1	1	4	High	1	44.9	0
P68402-1	platelet-activating factor acetylhydrolase IB subunit beta	1	1	4	High	1	25.6	0					18.2	23.3					64.7	51.3					75.6	69.5					40.9	55.3
Q13310	Polyadenylate-binding protein 4	1	2	2	High	1	70.7	0			44.9	44.6	8.9	15.6			83.6	86.4	27.1	25.4			59.8	48.7	21.6	21.3			37.2	54.1	19.8	23.5
A5A3E0	POTE ankyrin domain family member F	1	49	8	High	6	121.4	0	11.9	13.8	27.3	41.8	7.1	10.7	42.8	41.6	79.2	80.8	22.5	19.3	20.7	17.1	33	20.8	21.5	28.1	16.9	19.8	15	21.7	22.6	20.8
P0CG39	POTE ankyrin domain family member J	1	27	5	High	4	117.3	0	36.8	42.6	9.4	18.7	73	88.9	106.7	98.9	47.1	43.3	215.9	235.3	32.2	11.4	36.3	37	88.7	49.1	12.2	13.5	26.6	27.7	35.6	46.2
Q6P2Q9	Pre-mRNA-processing-splicing factor 8	1	3	1	High	1	273.4	0	4.6	9	6	5.2	10.2	10.3	35.2	43.6	38.9	50	52.3	53.3	26.9	27.2	31.9	29.8	36.2	40	30.3	31.5	32.7	38.5	37.2	42
Q9HCG8	Pre-mRNA-splicing factor CWC22 homolog	1	3	2	High	1	105.4	0	3.2	3.8	3.1	3.5	3.4	5.7	15	14.9	17	16.1	13.1	17.3	15	19.6	14.1	12.6	12.9	20.4	15.6	16.1	10.7	19.2	13.2	17.8
O76071	Probable cytosolic iron-sulfur protein assembly protein Ciao1	1	3	7	High	1	37.8	0		2	6.3	8.1	2.5	5.6	13	13.9	26.9	28.2	12.6	13.8	11.6	11.2	19.6	18.1	10.2	10.4	11.1	14.9	20.4	26.7	8.6	9
O00469-1	procollagen-lysine,2-oxoglutarate 5-dioxygenase 2	1	1	2	High	1	84.6	0			15.7	22.5					60.8	75.7					69.5	49.9					41.2	54.9
P07737	profilin-1	1	3	11	High	1	15	0	14	15.8	25.3	32.3	12.6	15.2	31.6	28.8	58.3	57.7	22.7	18	35.1	35.3	66.6	70.6	31.4	26.7	31.3	32.7	49	52.9	25.1	23.5
Q8WUM4	Programmed cell death 6-interacting protein	1	2	2	High	1	96	0			14.5	20.5	12.4	12.7			84.8	69.3	36.1	38.6			65.2	69.2	37.1	38.7			45.9	64.4	32.9	40.1
P35232	Prohibitin	1	1	10	High	1	29.8	0					7.2	7.2					18.6	17.1					17.1	18.3					13.7	20.4
Q99623	Prohibitin-2	1	4	4	High	1	33.3	0	7.1	9.2	13.6	18.1	56.9	89.6	23.5	18.5	49.5	51.5	106.6	110.7	21.2	24.1	52.6	53.2	76.6	87.2	22.4	23.4	43.5	47.6	71	86.1
Q15185	Prostaglandin E synthase 3	1	2	8	High	1	18.7	0			16.9	20.9	7.2	10.7			50.8	35.1	28.6	31.6			61.7	51.2	35	38.2			31.5	38.9	20.8	25.9
Q969U7	Proteasome assembly chaperone 2	1	3	5	High	1	29.4	0			14	18.7	10	14.2			72.1	80	43.9	47.2			64.6	67.9	52.1	44.6			52	61.2	44.6	52
O60888-1	Protein CutA	1	3	10	High	1	19.1	0	27.7	42.8	79.5	108	47.6	66.1	13.8	10.2	21	28.9	28	28.3	14.2	21.6	35.6	42.3	36.2	35.6	13.9	24.9	35.8	52.9	24.7	38.9
Q5TDH0	Protein DDI1 homolog 2	1	2	4	High	1	44.5	0	6.9	1.9	11.2	15.1			33.6	24.8	55.3	42			27.4	34.4	50.8	64.6			23.1	25.6	51.3	50.1
Q8NCA5	protein FAM98A	1	2	3	High	1	55.4	0	4.2	5.8	7.6	9.7			11.4	12.1	24.6	33.8			12.8	9.4	19.5	16.5			9.6	13.5	12.9	14.6
Q9HC24	Protein lifeguard 4	1	3	3	High	1	27	0	8.1	8.8	12.2	12.2	8.9	16.9	102.6	73.3	197.3	132.2	153.2	93.4	155	175.9	295.5	321.9	195.4	238.3	133	108.5	249.2	204.9	184.1	151.7
Q9BPW8	Protein NipSnap homolog 1	1	1	6	High	1	33.3	0			9.2	8.6					33.9	37.5					40.7	43.2					29.2	41.7
O14974	Protein phosphatase 1 regulatory subunit 12A	1	2	2	High	1	115.2	0			61.8	73.8					193	265					128.5	87.6					71	92.3
Q9HCY8	protein S100-A14	1	3	11	High	1	11.7	0	54.7	69.8	63	75	46.3	54.5	99.9	97.8	109	110.4	78.1	78.4	45.1	46.1	35.4	40.6	39.2	41.1	36.7	44.2	35.2	45.2	30.8	31
P26447	Protein S100-A4	1	1	8	High	1	11.7	0
Q01105	Protein SET	1	3	11	High	1	33.5	0	2.3		3	5.6		7.1	14.2	19.5	29.5	42.3	19.4	19.5	12.6	16	21.7	27.8	11.1	14.6	7.9	9.6	11.4	7.6	14.1	6.2
Q9H2V7	Protein spinster homolog 1	1	1	5	High	1	56.6	0						4.8					9.2	14.3					11.5	11.4					9.7	12.2
Q969Z0-1	Protein TBRG4	1	1	3	High	1	70.7	0					7.3	11.6					39.5	41.2					37.9	43.1					32.2	41.4
Q15436	protein transport protein Sec23A	1	1	3	High	1	86.1	0					3	11					28.9	25.3					27.6	32.6					29.6	36.9
Q15437	protein transport protein Sec23B	1	1	3	High	1	86.4	0					4.8	5.8					13.2	14					11	13					12.1	10.8
P61619	Protein transport protein Sec61 subunit alpha isoform 1	1	3	5	High	1	52.2	0	5.2	10.9	9.3	15.9	11.2	13.6	10.9	10.9	25.5	24.8	10.4	14.5	7.7	8.7	20.2	22.2	7.4	9.9	7.6	9.9	14.3	23.5	10.4	8.5
Q08AM6	Protein VAC14 homolog	1	1	1	High	1	87.9	0	6.8	5.1					22.5	20.4					22	16					16.6	25.2
Q8TB72-1	pumilio homolog 2	1	3	2	High	1	114.1	0	4.6	4.4	4.8	9.4	3.5	6.4	14.5	17.2	41	43.9	20.2	26.9	6.5	12.3	34.6	38.4	17.5	21.8	13.1	13.5	30.3	36.6	15.6	20.5
Q7L2E3-1	Putative ATP-dependent RNA helicase DHX30	1	1	2	High	1	133.9	0
Q8IZP2	Putative protein FAM10A4	1	2	4	High	1	27.4	0			43.2	50.1					148	120.3					151.5	151.8					120.6	144.2
Q6P996-1	Pyridoxal-dependent decarboxylase domain-containing protein 1	1	2	2	High	1	86.7	0					4.4	6.5					9.4	12.8					12.6	13.5					14	13.5
Q96C36	Pyrroline-5-carboxylate reductase 2	1	1	4	High	1	33.6	0
P31150	Rab GDP dissociation inhibitor alpha	1	2	4	High	1	50.6	0			3.1	4.3					11.6	12.8					14.5	12.5					7.7	12.3
Q9H2M9	Rab3 GTPase-activating protein non-catalytic subunit	1	1	2	High	1	155.9	0			5.9	10.5					24.9	24.1					30.4	28.6					23.3	30.4
Q9UJ41-1	Rab5 GDP/GTP exchange factor	1	1	3	High	1	79.3	0	8.8	12.4					30.2	33.3					29	28.3					30.2	30.5
Q9HA92	Radical S-adenosyl methionine domain-containing protein 1, mitochondrial	1	4	3	High	1	48.7	0			4.3	5.9	7.6	14			10.5	10.4	14.1	20.5			14.4	12.1	12.7	13.1			12.3	12.1	20	14.8
P52306-1	Rap1 GTPase-GDP dissociation stimulator 1	1	6	3	High	1	66.3	0	12.3	32.2	13.7	13.6	14.7	16.7	61.8	54.4	67.7	68.7	75.1	68.1	84.4	93.3	78.6	92.4	79.1	90.1	58	78.9	53.4	80.8	62.2	86.7
P61026	ras-related protein rab-10	1	3	6	High	1	22.5	0	13.3	22.7	27.3	43.4			35.1	40.8	86.9	90.9			43.2	42.1	84.6	97			35.2	36.8	70.7	82.7
P61224-1	Ras-related protein Rap-1b	1	2	7	High	1	20.8	0
P63244	Receptor of activated protein C kinase 1	1	1	3	High	1	35.1	0	17.6	16.2					33.1	31.2					34.4	28.4					22.6	27.3
Q13546	Receptor-interacting serine/threonine-protein kinase 1	1	4	2	High	1	75.9	0			16.8	21.2	8.3	7.1			56	50.5	23.9	27.7			72.2	65.3	19.6	29.2			56.6	64	24.1	21.3
P23469	Receptor-type tyrosine-protein phosphatase epsilon	1	1	2	High	1	80.6	0			4.9	7.8					12.7	16.8					23.1	21.4					22.2	18.2
P49795	Regulator of G-protein signaling 19	1	1	6	High	1	24.6	0					13.3	19.7					41.8	39.2					30.9	29.4					20.7	21.3
P40937-1	Replication factor C subunit 5	1	1	6	High	1	38.5	0					2.8	4.4					6.3	15.4					11.2	11.3					14.8	12.3
O15085-1	Rho guanine nucleotide exchange factor 11	1	1	2	High	1	167.6	0			7.2	12.5					28.2	25.9					14.9	17.6					20.6	29.8
Q9NZN5	Rho guanine nucleotide exchange factor 12	1	1	1	High	1	173.1	0					8.5	12.3					36.8	33.9					37.7	38.8					37.3	32.2
Q13464	Rho-associated protein kinase 1	1	1	2	High	1	158.1	0					3.5	3.5					11.8	12.6					12.2	13.8					13.9	16.6
A6NFN3	RNA binding protein fox-1 homolog 3	1	1	4	High	1	33.9	0			17.7	26.4					51	52					38.2	51.8					36.2	45.2
Q9H0A0	RNA cytidine acetyltransferase	1	1	1	High	1	115.7	0
Q9BWH6	RNA polymerase II-associated protein 1	1	2	2	High	1	152.7	0	4.4	4.1			2.8	5.5	14.2	11.3			15.4	9.7	15.2	15.5			13	14	13.5	15.2			11.7	13.8
Q14498-1	RNA-binding protein 39	1	1	4	High	1	59.3	0					8.7	7.1					14.1	20.8					17.7	17.6					18.6	18.9
O43865	S-adenosylhomocysteine hydrolase-like protein 1	1	1	5	High	1	58.9	0			6.5	5.6					23.6	34.1					33.7	37.5					16	21.5
Q9Y6Y8	SEC23-interacting protein	1	2	2	High	1	111	0			2.1	2.9	4.9	5.6			11	14.2	17.9	19.7			5.8	6.1	10.5	10.9			7.1	7.9	11.7	15.9
Q15019	septin-2	1	4	4	High	1	41.5	0	7.4	7.7	4.2	6	10.8	15.5	25.1	28	15.3	17.3	50.5	56.5	20.9	18.9	15.6	15.5	148.3	190.1	16.2	20.1	10.9	13.5	35.4	40.4
Q16181	Septin-7	1	1	8	High	1	50.6	0					2.7	6.1					37.3	43.1					21	16					17.4	23.7
O15269	serine palmitoyltransferase 1	1	1	4	High	1	52.7	0					6.6	3.9					24.3	26.5					22.7	26.9					25.9	29.9
Q5VT25-1	Serine/threonine-protein kinase MRCK alpha	1	1	1	High	1	197.2	0
Q9Y5S2	Serine/threonine-protein kinase MRCK beta	1	1	1	High	1	194.2	0			7.9	6.9					20.2	29.2					18.5	17.1					15.9	22.5
Q96Q15-1	Serine/threonine-protein kinase SMG1	1	2	0	High	1	410.2	0	14.7	21.1	6.5	12.8			39.9	40.6	39.1	35.8			42	56.8	35	33.2			25.6	35.5	25.6	34.5
Q9UHD2	Serine/threonine-protein kinase TBK1	1	2	3	High	1	83.6	0			28.6	30.2					86	94.7					67.1	59.3					65	68
Q66LE6	Serine/threonine-protein phosphatase 2A 55 kDa regulatory subunit B delta isoform	1	3	3	High	1	52	0	14.6	21.4	14.9	20.3	22.5	28.6	65.5	59.2	50.3	56	75.7	81.5	85.4	71.9	62.5	69.9	89.5	98.3	43.9	63.1	48.8	50	61.4	84.5
Q14738-1	Serine/threonine-protein phosphatase 2A 56 kDa regulatory subunit delta isoform	1	6	2	High	1	69.9	0	15.5	20	13.8	19.4	17.5	19.5	60.3	74.4	44	49.4	44.5	50.8	75.7	65.1	55	54.9	53.1	55.5	62.7	69	48.3	57.2	40.4	55
Q16537	Serine/threonine-protein phosphatase 2A 56 kDa regulatory subunit epsilon isoform	1	3	3	High	1	54.7	0	5.1	8.1	7.9	5.4	4.9	9.9	17.3	19	20.5	15.3	16.1	18.4	24.8	18.2	18.7	19.3	18	14.6	19.5	23.7	18.8	21.4	24.9	16.7
P30154	Serine/threonine-protein phosphatase 2A 65 kDa regulatory subunit A beta isoform	1	10	10	High	4	66.2	0			12.3	15					53.4	55					64.2	62.4					58.4	65.3
O00743	Serine/threonine-protein phosphatase 6 catalytic subunit	1	3	5	High	1	35.1	0	9.5	15	12.3	14	10	13.6	40.6	35	46.1	46.9	31	31.3	33.9	38.4	38.1	46.3	29.8	31.9	23.8	30.8	23.1	33.2	21.8	28.4
Q8TEL6	Short transient receptor potential channel 4-associated protein	1	3	2	High	1	90.8	0	4.2	6.1	5.9	6.3	9.2	5.2	15.2	18.5	27.8	35.4	20.6	21.3	18.7	21.2	44.9	49.2	31.1	39	17.2	20.5	43.9	44.7	33.3	35.2
P45954	Short/branched chain specific acyl-CoA dehydrogenase, mitochondrial	1	1	5	High	1	47.5	0					3	4.2					7.4	6.7					12.8	7.5					6.8	12.8
O76094	Signal recognition particle subunit SRP72	1	1	3	High	1	74.6	0					4.6	5.8					13.3	14.7					14.8	17.1					8.2	14.1
P40763	Signal transducer and activator of transcription 3	1	2	2	High	1	88	0			11.6	7.3	11.4	6.8			15.7	24.1	15.9	14.6			38.8	33.2	32.6	34.9			25.8	26	25.4	27.2
P0DJJ0	SLIT-ROBO Rho GTPase-activating protein 2C	1	4	3	High	1	53.5	0	9.4	16.9	7	8.3	39.9	37.4	22.7	26.4	24.2	35	90.3	102.1	17.2	21.8	28.7	25.7	78.7	61.1	21.9	21.5	27.5	25.7	60.2	82.1
Q13126-1	S-methyl-5'-thioadenosine phosphorylase	1	2	6	High	1	31.2	0			5.4	8					18.9	18.4					13	19.8					14.4	16.2
P11166	Solute carrier family 2, facilitated glucose transporter member 1	1	3	2	High	1	54	0	55.4	66.6	61.4	69.8	30.6	38.6	139.4	172.4	121.6	135.4	76.5	83.9	142.9	106.7	102.5	67.3	78.3	59.7	90.4	125.6	54.3	74.1	46.4	61.9
Q9Y5X3	sorting nexin-5	1	1	6	High	1	46.8	0
Q96R06	Sperm-associated antigen 5	1	1	2	High	1	134.3	0					5.2	10.6					29	30.2					23.1	26.4					28.1	29.4
P26368	Splicing factor U2AF 65 kDa subunit	1	1	2	High	1	53.5	0			49.6	54					122.8	126.8					82	98					66.8	83.9
Q9H2G2-1	STE20-like serine/threonine-protein kinase	1	1	2	High	1	142.6	0
Q9UJZ1	Stomatin-like protein 2, mitochondrial	1	2	4	High	1	38.5	0	8.2	9.1			11.5	13	27.3	31.2			31.7	42	28	28.8			33.6	36.2	31.7	38.7			28.7	50.1
Q8WXE9-1	Stonin-2	1	6	1	High	1	101.1	0	613	429.7	725.1	507.2	633.6	478.4	251.9	291.9	306.1	357.4	235.3	309.5	316.4	156.4	369.8	206.9	329.8	145.7	97.8	117.7	127.4	132.3	90.4	111.7
P38646	Stress-70 protein, mitochondrial	1	2	2	High	1	73.6	0			7.9	11.3	6.5	10.7			48.7	42.9	30.2	22.1			33	46.1	23.2	32.8			30.1	35.3	25.3	21.3
O95347-1	structural maintenance of chromosomes protein 2	1	2	2	High	1	135.6	0			2.5	5.1	5.2	3			13.2	13	12.9	17.1			11.7	10.2	22.1	22.7			12.2	12.7	19.5	22.9
Q92922	SWI/SNF complex subunit SMARCC1	1	2	2	High	1	122.8	0					11.3	14.5					82.8	96.6					53.3	61.9					75.2	74.3
O00560-1	Syntenin-1	1	3	8	High	1	32.4	0	4.8	2.8	3.1		4.7	3.8	11.1	9.7	16.2	12.7	19.2	19	13.3	12.7	12.2	12.8	17.9	22.5	8.2	11	11	16.2	14.2	17.2
Q6P3X3	tetratricopeptide repeat protein 27	1	2	2	High	1	96.6	0					12.5	10.1					30.2	31.8					33.1	28.9					26.6	26.2
P30048	Thioredoxin-dependent peroxide reductase, mitochondrial	1	2	5	High	1	27.7	0			24.2	33.8	10.6	9.6			66	47.3	27	21.6			53.9	61.9	24.3	33.2			49.5	52.4	14.5	25.5
Q86V81	THO complex subunit 4	1	1	10	High	1	26.9	0					17.6	28.6					52.9	89.4					23.3	25.4					31.5	48.6
P26639-1	Threonine--tRNA ligase, cytoplasmic	1	2	2	High	1	83.4	0			14.1	22.2	18.8	36.6			43	51.4	46.8	57			39.1	45.1	49	43.3			36.4	39.1	38.6	50.8
Q9BV44	THUMP domain-containing protein 3	1	1	4	High	1	57	0			7	11.9					39	37.2					45.3	42.2					30.3	44.9
P04183	Thymidine kinase, cytosolic	1	4	8	High	1	25.5	0	11.6	14.4	10.2	12	30.5	35.3	33	30.4	32	36.7	90.4	81.4	17.6	17.6	28.4	32.5	63.5	66.8	23.9	28.3	24.7	41.2	65.4	74.1
P04818	thymidylate synthase	1	3	4	High	1	35.7	0	9.1	14.3	14.1	17.3	21.3	22.5	28.1	35.2	47.7	58.9	59.6	62.2	30.3	32.6	42.3	39.2	50.4	41.6	29.8	32.4	58.4	62.1	69.3	62.2
Q6YHU6	Thyroid adenoma-associated protein	1	1	1	High	1	219.5	0			5.9	5.3					25.4	29.7					25.6	88.3					25.1	40
Q9BQ70	Transcription factor 25	1	2	4	High	1	76.6	0			8.8	8.6	8.2	11.3			38.6	31	46	44			24.7	30.2	35.3	30.1			18.9	27.2	23.5	33.4
P01137	Transforming growth factor beta-1	1	1	5	High	1	44.3	0	9.1	6					23.3	26.6					16.7	15.9					15.8	23.5
P30536	translocator protein	1	1	15	High	1	18.8	0
P55084	Trifunctional enzyme subunit beta, mitochondrial	1	1	3	High	1	51.3	0
P67936	Tropomyosin alpha-4 chain	1	3	8	High	2	28.5	0					16.1	20.6					61.5	54					58.3	31.3					27.6	35.7
P07477	Trypsin-1	1	3	8	High	1	26.5	0	43.7	43.6	52.1	51.7	30.2	34.5	43.1	33.6	54.5	36.5	40.3	18.9	36.4	30.1	43.3	39.4	28.8	31.1	35.6	30	43.6	34.8	32.1	21.9
Q13885	Tubulin beta-2A chain	1	51	40	High	13	49.9	0	44.7	47.4	76.6	80.5	52.8	55.8	70.1	59.5	91	108.4	68	71.3	49.5	58.2	66.3	76.1	39.5	51.6	41.5	50.2	55.4	77.2	43.3	54.9
Q15813	Tubulin-specific chaperone E	1	1	3	High	1	59.3	0					19.9	28.2					47.3	59.9					37.8	38					30.8	35.1
P08138	Tumor necrosis factor receptor superfamily member 16	1	2	5	High	1	45.2	0			6.8	3.8					12.6	11.7					15.3	11.8					8.8	13.6
P07948-1	Tyrosine-protein kinase Lyn	1	4	4	High	2	58.5	0	66.9	76.2	87.2	106.6	78.1	97.2	127.9	135.6	178	175.1	175.1	174.7	33.2	27.9	50.8	36.2	66.9	60	31.7	47.9	42.3	71.2	59	81
P07947	tyrosine-protein kinase Yes	1	5	4	High	2	60.8	0			24.2	29.9	10.1	12.2			58.8	63.7	33.8	31.7			39.9	43.9	19.3	19.3			30.8	35.1	14.2	24.8
Q9H3S7	Tyrosine-protein phosphatase non-receptor type 23	1	1	2	High	1	178.9	0
P09661	U2 small nuclear ribonucleoprotein A'	1	1	10	High	1	28.4	0			6.2	7.7					10.4	11.9					10.6	9.6					8.3	12.9
O15042	U2 snRNP-associated SURP motif-containing protein	1	3	1	High	1	118.2	0	3.7	4.3	8.4	18	17.2	20.2	13.9	17.9	34.9	36.6	46.9	43.2	16.7	17.5	33.2	35.6	44.2	37.1	16.9	19.6	30.6	35.5	37.3	40
Q9UPU5	Ubiquitin carboxyl-terminal hydrolase 24	1	3	1	High	1	294.2	0	5.3	5.3	4	6.9	10.6	11	20	21.3	27.4	25.5	30.3	27.4	25.3	17.3	30.9	30.2	24.5	30.4	18.2	20.7	32.5	32.8	30.6	26.7
P61077-1	Ubiquitin-conjugating enzyme E2 D3	1	1	16	High	1	16.7	0					4.7	6.7					18.1	16					13.9	15.3					8.8	13.7
O60701	UDP-glucose 6-dehydrogenase	1	1	4	High	1	55	0	6.5	6.4					20.3	18.6					14.4	18.7					15.8	17.5
Q9NYU1	UDP-glucose:glycoprotein glucosyltransferase 2	1	2	1	High	1	174.6	0	11.8	16.3	9.8	16.7			36.2	38.5	29.2	37.3			48.2	65.1	46.9	45.3			50.1	54.9	29.4	41.6
P30085-1	UMP-CMP kinase	1	1	6	High	1	22.2	0					14	13.8					36.6	33					48.1	41.8					37.5	42.5
O15063	Uncharacterized protein KIAA0355	1	3	2	High	1	115.9	0	6	5.8	5.8	8.9	5.5	9.6	12.9	14.7	17.1	15.2	17.4	16.9	21.8	14.1	36.7	16.7	21.3	13.4	19	18.5	23.5	21.1	15.5	19.1
Q9BY89-1	Uncharacterized protein KIAA1671	1	1	1	High	1	196.6	0
O94832	Unconventional myosin-Id	1	1	1	High	1	116.1	0					15.8	22.5					53.9	52.7					50.2	47.8					33.1	45.6
Q9Y224	UPF0568 protein C14orf166	1	3	5	High	1	28.1	0	12.4	13			37.2	46.5	29.9	42.1			109.9	119.1	23.4	26			72.1	71.2	22.8	25.7			80.7	87.8
O75436-1	Vacuolar protein sorting-associated protein 26A	1	1	4	High	1	38.1	0
Q96AX1	Vacuolar protein sorting-associated protein 33A	1	2	5	High	1	67.6	0			3.4	4.3	3.6	9.1			17.6	21.6	25.6	29			19.6	22.2	21.5	20.4			17.3	17.5	21.9	21.9
Q8N1B4	Vacuolar protein sorting-associated protein 52 homolog	1	2	3	High	1	82.2	0			3.2	6.2	5	7.4			15.4	17.2	20.5	27.1			14.1	12.6	19.1	19.4			10.4	19.2	17.2	20.9
Q96JC1-1	Vam6/Vps39-like protein	1	1	2	High	1	101.7	0					4.9	3.9					17.6	21.1					18.7	19.8					22.8	23.8
P50552	Vasodilator-stimulated phosphoprotein	1	1	4	High	1	39.8	0	33.5	36.3					92.7	95					83.3	49.6					27.9	45.4
P18206	Vinculin	1	1	2	High	1	123.7	0			12.2	12.8					33.6	38.6					31.2	32					26.4	24.9
P21281	V-type proton ATPase subunit B, brain isoform	1	1	3	High	1	56.5	0			12.4	17					37.8	56					43.4	41.7					29.5	37.9
Q9BZH6	WD repeat-containing protein 11	1	1	1	High	1	136.6	0			11	14.7					34.7	29.4					27.9	35.1					23.7	38.1
Q9GZS3	WD repeat-containing protein 61	1	4	7	High	1	33.6	0	8.4	13.3	19.5	72.2	4	24.3	22.5	23.6	117	115.2	36.9	43.2	38.3	33.8	159.7	176.8	41.8	49.3	22.3	30.9	128.1	152.7	40.3	48.5
Q7Z5K2-1	Wings apart-like protein homolog	1	1	1	High	1	132.9	0					5.9	3.2					21	22.7					20.3	16.7					21.2	28.1
Q92504	Zinc transporter SLC39A7	1	6	6	High	1	50.1	0	16.8	13.5	30.2	30.4	29.7	29	48.7	40.8	101.3	91	82	88.4	9.5	20.2	39.9	43.8	35	36.8	10	17.5	30	57.7	29.8	45.9
